# Supplementary material
Source: publisher figshare collection journal article supplement (https://acs.figshare.com/ndownloader/files/4608733)

# **A Samarium(II)–Mediated, Stereoselective Cyclization for the Synthesis of Azaspirocycles**

Giuditta Guazzelli, Lorna A. Duffy, David J. Procter\*

*School of Chemistry, University of Manchester, Oxford Road, Manchester,  
M13 9PL, UK.*

Email. david.j.procter@manchester.ac.uk.

## **Contents**

|          |                                                                 |
|----------|-----------------------------------------------------------------|
| S 1      | General Experimental                                            |
| S 2      | Preparation of Samarium Iodide                                  |
| S 3-46   | Experimental                                                    |
| S 47-107 | <sup>1</sup> H and <sup>13</sup> C NMR spectra of new compounds |
| S 108    | X ray crystal structures                                        |

## General Experimental

All experiments were performed under an atmosphere of nitrogen, using anhydrous solvents, unless stated otherwise. Glassware for inert atmosphere reactions was oven-dried and cooled under a flow of nitrogen. THF was distilled from sodium/benzophenone, CH<sub>2</sub>Cl<sub>2</sub> and diisopropylamine were distilled from CaH<sub>2</sub>. DMPU was distilled from CaH<sub>2</sub> and stored under N<sub>2</sub>. All other solvents and reagents were purchased from commercial sources and used as supplied.

<sup>1</sup>H NMR and <sup>13</sup>C NMR were recorded on a Bruker 400, Bruker 500 or a 500 Varian spectrometer, with chemical shift values being reported in ppm relative to residual chloroform ( $\delta_{\text{H}} = 7.27$  or  $\delta_{\text{C}} = 77.2$ ) as internal standards unless otherwise stated. All coupling constants (*J*) are reported in Hertz (Hz).

Low-resolution mass spectra were recorded on a Fissions VG Trio 2000 quadrupole mass spectrometer or a Thermo LTQ FT spectrometer. Spectra were obtained using electron impact ionisation (EI) and chemical ionisation (CI) techniques, or positive and/or negative electrospray ionisation (ES). High-resolution mass spectra were recorded on a Thermo Finnigan MAT 95XP mass spectrometer.

Infra-red spectra were recorded using a JASCO FT/IR 410 spectrometer or using an ATI Mattson Genesis Series FTIR spectrometer as evaporated films or neat using sodium chloride windows.

Melting points were measured on a Sanyo Gallenkamp variable heater apparatus and are uncorrected.

Column chromatography was carried out using Fischer Scientific 35 – 70  $\mu$ , 60A silica gel. Routine TLC analysis was carried out on aluminium sheets coated with Merck silica gel 60 F254, 0.2 mm thickness. Plates were viewed using a 254 nm ultraviolet lamp and dipped in aqueous potassium permanganate, p-anisaldehyde, Dragendorff's reagent or DNP.

## Preparation of Samarium Iodide (SmI<sub>2</sub>)

Samarium Iodide was prepared by a modification of the procedure of Imamoto and Ono.<sup>1</sup>

Samarium powder (2.00 g, 13.8 mmol, 1.2 eq) was added to an oven dried round bottomed flask, the flask sealed and flushed with N<sub>2</sub> for 20 min. THF (110 ml) was added and the resulting suspension bubbled with N<sub>2</sub> for 15 min. Finally, iodine (2.80 g, 10.8 mmol, 1 eq) was added and the flask flushed again with N<sub>2</sub> for 10 min. The flask was covered in aluminium foil and heated at 60 °C for 18 hours. The approx 0.1 M solution was allowed to cool to room temperature and then used directly.

---

<sup>1</sup> Imamoto, T.; Ono, M. *Chem. Lett.* **1987**, 501.

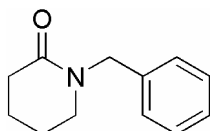

### 1-Benzyl-piperidin-2-one<sup>2</sup>

To a suspension of NaH (0.73 g, 30.3 mmol, 1 eq) in THF (40 ml) at 0 °C was added a solution of  $\delta$ -valerolactam (3.00 g, 30.3 mmol, 1 eq) in THF (40 ml) and the reaction mixture stirred for 30 min. The reaction was then warmed to room temperature and left to stir for a further 30 min until H<sub>2</sub> ceased to evolve. Benzyl bromide (3.60 ml, 30.3 mmol, 1 eq) was added dropwise and the reaction stirred for 18 hours. The reaction was quenched by the addition of H<sub>2</sub>O (100 ml) and extracted with CH<sub>2</sub>Cl<sub>2</sub> (3  $\times$  80 ml). The combined organic extracts were dried (MgSO<sub>4</sub>) and concentrated *in vacuo* to give 1-benzylpiperidin-2-one (4.07 g, 21.5 mmol, 71%) as a yellow oil;  $\delta_H$  (500 MHz, CDCl<sub>3</sub>) 1.80 (4H, m, CH<sub>2</sub>CH<sub>2</sub>), 2.49 (2H, t, *J* 6.5 Hz, CH<sub>2</sub>C(O)), 3.22 (2H, t, *J* 6.0 Hz, CH<sub>2</sub>N), 4.62 (2H, s, NCH<sub>2</sub>Ph), 7.25 (5H, m, 5  $\times$  Ar-CH);  $\delta_C$  (125 MHz, CDCl<sub>3</sub>) 20.7 (CH<sub>2</sub>), 22.5 (CH<sub>2</sub>), 31.8 (CH<sub>2</sub>), 46.6 (NCH<sub>2</sub>), 49.3 (NCH<sub>2</sub>Ph), 126.6 (Ar-CH), 127.4 (2  $\times$  Ar-CH), 127.9 (2  $\times$  Ar-CH), 136.7 (Ar-C), 169.0 (C(O)).

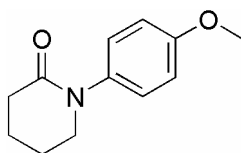

### 1-(4-Methoxy-phenyl)-piperidin-2-one<sup>3</sup>

To a solution of  $\delta$ -valerolactam (2.85 g, 28.7 mmol, 1.2 eq) in DMF (30 ml) was added, CuI (0.91 g, 4.79 mmol, 0.2 eq), K<sub>3</sub>PO<sub>4</sub> (10.2 g, 48.0 mmol, 2 eq), *N,N*-dimethylethylenediamine (0.51 ml, 4.79 mmol, 0.2 eq) and 4-bromoanisole (3.00 ml, 24.0 mmol, 1 eq) and the reaction was heated to reflux at 110 °C for 18 hours. The reaction was quenched by filtering through a plug of Na<sub>2</sub>SO<sub>4</sub> and washing with CH<sub>2</sub>Cl<sub>2</sub> (3

<sup>2</sup> Diez, A.; Castells, J.; Forns, P.; Rubiralta, M. *Tetrahedron* **1994**, 50, 6585.

<sup>3</sup> Wang, E, C.; Lin, H, J. *Heterocycles* **1998**, 48, 481.

× 30 ml). The combined organic extracts were then washed with H<sub>2</sub>O (4 × 40 ml) and dried (Na<sub>2</sub>SO<sub>4</sub>) and concentrated *in vacuo* to give the crude product. Purification by flash column chromatography on silica gel eluting with 70% EtOAc in petroleum ether (40-60) gave 1-(4-methoxy-phenyl)-piperidin-2-one (4.91 g, 21.6 mmol, 90%) as a yellow solid;  $\nu_{\max}$  (neat)/cm<sup>-1</sup> 3435, 2945, 1651 (C(O)), 1511, 1411, 1243, 1164, 1032, 830, 641, 448 and 409;  $\delta_{\text{H}}$  (500 MHz, CDCl<sub>3</sub>) 1.93 (4H, m, CH<sub>2</sub>CH<sub>2</sub>), 2.56 (2H, t, *J* 6.2 Hz, C(O)CH<sub>2</sub>), 3.60 (2H, t, *J* 5.7 Hz, NCH<sub>2</sub>), 3.80 (3H, s, OCH<sub>3</sub>), 6.91 (2H, d, *J* 8.8 Hz, 2 × Ar-CH), 7.15 (2H, d, *J* 8.8 Hz, 2 × Ar-CH);  $\delta_{\text{C}}$  (100 MHz, CDCl<sub>3</sub>) 21.5 (CH<sub>2</sub>), 23.6 (CH<sub>2</sub>), 32.8 (C(O)CH<sub>2</sub>), 52.0 (NCH<sub>2</sub>), 55.5 (OCH<sub>3</sub>), 114.5 (2 × Ar-CH), 127.4 (2 × Ar-CH), 136.3 (Ar-CN), 158.1 (Ar-CO) and 170.1 (C(O)); *m/z* (CI mode) 205 (M, 100), *m/z* (EI mode) 205 ((M), 70), 149 (50), 136 (45), 120 (15), 92 (10), 83 (100), 77 (5), 64 (5) and 55(3), (Found: (M), 205.1091. C<sub>12</sub>H<sub>15</sub>O<sub>2</sub>N requires *M*, 205.1097). mp (MeOH) 54-56 °C.

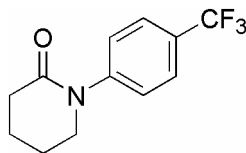

### 1-(4-Trifluoromethyl-phenyl)-piperidin-2-one

To a solution of  $\delta$ -valerolactam (2.58 g, 26.1 mmol, 1.2 eq) in DMF (36 ml) was added, CuI (0.86 g, 4.35 mmol, 0.2 eq), K<sub>3</sub>PO<sub>4</sub> (9.27 g, 43.5 mmol, 2 eq), *N,N*-dimethylethylenediamine (0.46 ml, 4.35 mmol, 0.2 eq) and 4-bromoanisole (3.00 ml, 21.7 mmol, 1 eq) and the reaction was heated to reflux at 110 °C for 18 hours. Aqueous saturated NH<sub>4</sub>Cl (15 ml) was then added and the aqueous layer was separated and extracted with EtOAc (3 × 50 ml). The combined organic extracts were then washed with H<sub>2</sub>O (3 × 100 ml) and dried (Na<sub>2</sub>SO<sub>4</sub>) and concentrated *in vacuo* to give the crude product. Purification by flash column chromatography on silica gel eluting with 70% EtOAc in petroleum ether (40-60) gave 1-(4-trifluoromethyl-phenyl)-piperidin-2-one (3.58 g, 14.7 mmol, 68%) as a yellow solid;  $\nu_{\max}$  (neat)/cm<sup>-1</sup> 2954, 2362, 1642 (C(O)), 1517, 1410, 1330, 1162, 1116, 1069, 838, 741, 700, 663, 603, 416 and 409;  $\delta_{\text{H}}$  (500 MHz, CDCl<sub>3</sub>) 1.89 (4H, m, CH<sub>2</sub>CH<sub>2</sub>), 2.52 (2H, t, *J* 6.0 Hz, CH<sub>2</sub>C(O)), 3.60 (2H, t, *J* 6.0 Hz, NCH<sub>2</sub>), 7.33 (2H, d, *J* 8.5 Hz, 2 × Ar-CH), 7.57 (2H, d, *J* 8.5 Hz, 2 × Ar-CH);  $\delta_{\text{C}}$

(100 MHz, CDCl<sub>3</sub>) 21.4 (CH<sub>2</sub>), 23.5 (CH<sub>2</sub>), 32.9 (C(O)CH<sub>2</sub>), 51.2 (NCH<sub>2</sub>), 123.9 (CF<sub>3</sub>, q, *J* 271 Hz), 126.1 (2 × Ar-CH), 126.2 (2 × Ar-CH), 128.5 (Ar-CCF<sub>3</sub>, q, *J* 32 Hz), 146.4 (Ar-CN) and 170.1 (C(O)); *m/z* (CI mode) 244 (M + H, 100), *m/z* (EI mode) 242 ((M-H), 60), 224 (25), 215 (20), 186 (90), 174 (100), 145 (60), 118 (20), 95 (20), 75(25), 69 (35), 55 (65), 49 (30) and 42 (50), (Found: (M), 243.0861. C<sub>12</sub>H<sub>12</sub>ONF<sub>3</sub> requires *M*, 243.0866). mp (MeOH) 81-83 °C.

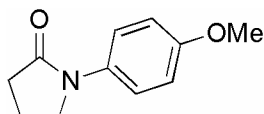

### 1-(4-Methoxy-phenyl)-pyrrolidin-2-one<sup>3</sup>

To a solution of pyrrolidin-2-one (8.00 ml, 104 mmol, 3 eq) in DMF (30 ml) was added, Cu powder (4.42 g, 69.6 mmol, 2 eq), K<sub>3</sub>CO<sub>3</sub> (4.80 g, 34.8 mmol, 1 eq) and 1-iodo-4-methoxy-benzene (8.14 g, 34.8 mmol, 1 eq) and the reaction was heated to reflux at 150 °C for 18 hours. The reaction was quenched by filtering through a plug of silica and washing with CH<sub>2</sub>Cl<sub>2</sub> (3 × 50 ml). Purification by flash column chromatography on silica gel eluting with 80% EtOAc in petroleum ether (40-60) gave 1-(4-methoxy-phenyl)-pyrrolidin-2-one (6.64 g, 34.7 mmol, 99%) as a yellow oil; *v*<sub>max</sub> (neat)/cm<sup>-1</sup> 2952, 1883, 1682 (C(O)), 1514, 1400, 1253, 1126, 1032, 908, 756, and 665; δ<sub>H</sub> (300 MHz, CDCl<sub>3</sub>) 2.11 (2H, m, CH<sub>2</sub>CH<sub>2</sub>N), 2.56 (2H, t, *J* 7.8 Hz, CH<sub>2</sub>), 3.77 (3H, s, OCH<sub>3</sub>), 3.78 (2H, m, NCH<sub>2</sub>), 6.88 (2H, d, *J* 9.0 Hz, 2 × Ar-CH), 7.47 (2H, d, *J* 9.0 Hz, 2 × Ar-CH); δ<sub>C</sub> (75 MHz, CDCl<sub>3</sub>) 18.0 (CH<sub>2</sub>), 37.5 (CH<sub>2</sub>), 49.2 (NCH<sub>2</sub>), 55.5 (OCH<sub>3</sub>), 114.0 (2 × Ar-CH), 122.2 (2 × Ar-CH), 132.7 (Ar-CN), 156.6 (Ar-CO), 173.9 (C(O)); *m/z* (CI mode) 192 (M + H, 100), 178 (30). *m/z* (EI mode) 191 (M, 40), 177 (10), 136 (100), 122 (35) and 68 (10). (Found: (M), 191.0936. C<sub>11</sub>H<sub>13</sub>O<sub>2</sub>N requires *M*, 191.0941).

<sup>4</sup>Klapars, A.; Jon, C.; Huang, X.; Buchwald, S.L. *J. Am. Chem. Soc.* **2002**, 123, 7727.

## General Procedure A: Preparation of lactam phosphonates

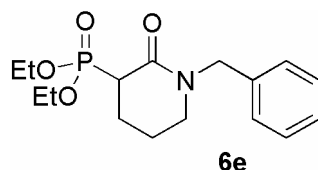

### (1-Benzyl-2-oxo-piperidin-3-yl)-phosphonic acid diethyl ester **6e**

LDA was formed by the addition of *n*-BuLi (1.93 M in hexanes, 8.23 ml, 15.9 mmol, 2 eq) to a stirred solution at -78 °C of diisopropylamine (2.24 ml, 15.9 mmol, 2 eq) in THF (20 ml) and left for 1 hour. A solution of (1.50 g, 7.94 mmol, 1 eq) in THF (10 ml) was added and the reaction mixture stirred for 30 min, at which point it was raised to room temperature and diethylchlorophosphate (1.15 ml, 7.94 mmol, 1 eq) was added and stirred for 18 hours. The solution was acidified to pH 1 by the addition of 1M HCl and the aqueous layer was separated and extracted with CH<sub>2</sub>Cl<sub>2</sub> (3 × 50 ml). The combined organic extracts were dried (Na<sub>2</sub>SO<sub>4</sub>) and concentrated *in vacuo* to give the crude product. Purification by flash column chromatography on silica gel eluting with 60% EtOAc in petroleum ether (40-60) gave (1-benzyl-2-oxo-piperidin-3-yl)-phosphonic acid diethyl ester **6e** (1.42 g, 4.80 mmol, 60%) as a brown oil;  $\nu_{\max}$  (neat)/cm<sup>-1</sup> 3469, 2982, 1625 (C(O)), 1493, 1451, 1355, 1286, 1247, 1165, 1026, 967, 752, 701 and 665;  $\delta_{\text{H}}$  (500 MHz, CDCl<sub>3</sub>) 1.40 (6H, m, 2 × CH<sub>3</sub>), 1.77 (1H, m, 1H from CH<sub>2</sub>CH<sub>2</sub>N), 2.20 (3H, m, 1H from CH<sub>2</sub>CH<sub>2</sub>N and 2H from CHCH<sub>2</sub>), 3.13 (1H, dt, *J* 26.7, 6.5 Hz, CHP), 3.30 (2H, m, NCH<sub>2</sub>), 4.29 (4H, m, 2 × OCH<sub>2</sub>), 4.57 (1H, d, *J* 14.8 Hz, 1H from NCH<sub>2</sub>Ph), 4.79 (1H, d, *J* 14.8 Hz, 1H from NCH<sub>2</sub>Ph), 7.34 (5H m, 5 × Ar-CH);  $\delta_{\text{C}}$  (125 MHz, CDCl<sub>3</sub>) 16.5 (2 × CH<sub>3</sub>), 21.5 (CH<sub>2</sub>), 23.3 (CH<sub>2</sub>), 41.8 (CH, d, *J* 136 Hz), 47.2 (NCH<sub>2</sub>), 50.3 (NCH<sub>2</sub>Ph), 62.1 (OCH<sub>2</sub>), 63.0 (OCH<sub>2</sub>), 127.4 (Ar-CH), 127.9 (2 × Ar-CH), 128.6 (2 × Ar-CH), 136.9 (Ar-CN), 165.1 (C(O)); *m/z* (CI mode) 326 (*M*, 100) and 90 (30). *m/z* (EI mode) 326 (*M*, 5), 205 (5), 177 (9), 158 (80), 132 (40), 104 (20), 90 (100), 80 (12), 64 (30), 55 (30) and 50 (10). (Found: (*M*), 325.1445. C<sub>16</sub>H<sub>24</sub>O<sub>4</sub>NP requires *M*, 325.1437).

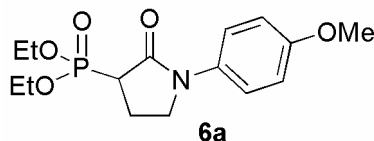

### 1-(4-Methoxy-phenyl)-2-oxo-pyrrolidin-3-yl]-phosphonic acid diethyl ester **6a**

As for general procedure A, a solution of LDA was prepared by the addition of *n*-BuLi (2.21 M in hexanes, 9.50 ml, 20.9 mmol, 2 eq) to a solution of diisopropylamine (3.00 ml, 20.9 mmol, 2 eq) in THF (40 ml), followed by the addition of 1-(4-methoxyphenyl)pyrrolidin-2-one (2.00 g, 10.4 mmol, 1 eq) in THF (30 ml) and diethylchlorophosphate (1.50 ml, 10.4 mmol, 1 eq) in THF (6 ml), after purification by flash column chromatography on silica gel eluting with 5% MeOH in EtOAc gave 1-(4-methoxy-phenyl)-2-oxo-pyrrolidin-3-yl]-phosphonic acid diethyl ester **6a** (2.83 g, 8.65 mmol, 83%) as a yellow oil;  $\nu_{\max}$  (neat)/cm<sup>-1</sup> 3467, 2984, 2050, 1686 (C(O)), 1513, 1443, 1323, 1296, 1181, 1121, 971, 832, 759, 665, 609, 559 and 430;  $\delta_{\text{H}}$  (300 MHz, CDCl<sub>3</sub>) 1.33 (6H, m, 2 × OCH<sub>2</sub>CH<sub>3</sub>), 2.47 (2H, m, CHCH<sub>2</sub>), 3.14 (1H, m, CHP), 3.73 (1H, m, 1H from NCH<sub>2</sub>), 3.78 (3H, s, OCH<sub>3</sub>), 3.94 (1H, m, 1H from NCH<sub>2</sub>), 4.20 (4H, m, 2 × OCH<sub>2</sub>CH<sub>3</sub>), 6.88 (2H, dd, *J* 9.0 and 2.3 Hz, 2 × Ar-CH), 7.46 (2H, dd, *J* 9.0 and 2.1 Hz, 2 × Ar-CH);  $\delta_{\text{C}}$  (75 MHz, CDCl<sub>3</sub>) 16.5 (2 × CH<sub>3</sub>), 20.5 (CH<sub>2</sub>), 42.4 (CH, d, *J* 141 Hz), 48.1 (CH<sub>2</sub>), 55.5 (OCH<sub>3</sub>), 62.5 (OCH<sub>2</sub>), 63.3 (OCH<sub>2</sub>), 114.1 (2 × Ar-CH), 122.2 (2 × Ar-CH), 132.2 (Ar-CN), 156.9 (Ar-CO), 168.3 (C(O)); *m/z* (CI mode) 328 (*M* + H, 100). *m/z* (EI mode) 327 (*M*, 100), 189 (20), 162 (20), 149 (35) and 136 (5). (Found: (*M*), 327.1227. C<sub>15</sub>H<sub>22</sub>O<sub>5</sub>NP requires *M*, 327.1230).

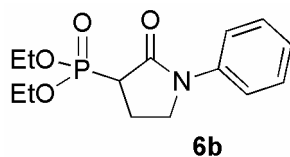

### (2-Oxo-1-phenyl-pyrrolidin-3-yl)-phosphonic acid diethyl ester **6b**

As for general procedure A, a solution of LDA was prepared by the addition of *n*-BuLi (1.92 M in hexanes, 13.0 ml, 24.8 mmol, 2 eq) to a solution of diisopropylamine (3.52



ml, 24.8 mmol, 2 eq) in THF (40 ml), followed by the addition of 1-phenylpyrrolidin-2-one (2.00 g, 12.4 mmol, 1 eq) in THF (6 ml) and diethylchlorophosphate (1.80 ml, 12.4 mmol, 1 eq) in THF (6 ml) after purification by flash column chromatography on silica gel eluting with 2% MeOH in EtOAc gave (2-oxo-1-phenyl-pyrrolidin-3-yl)-phosphonic acid diethyl ester **6b** (3.30 g, 11.6 mmol, 93%) as a yellow oil;  $\nu_{\max}$  (neat)/cm<sup>-1</sup> 3434, 3018, 1692 (C(O)), 1599, 1498, 1401, 1302, 1216, 1026, 973, 755 and 668;  $\delta_{\text{H}}$  (500 MHz, CDCl<sub>3</sub>) 1.35 (3H, t, *J* 7.0 Hz, OCH<sub>2</sub>CH<sub>3</sub>), 1.38 (3H, t, *J* 7.0 Hz, OCH<sub>2</sub>CH<sub>3</sub>), 2.51 (2H, m, CH<sub>2</sub>CH<sub>2</sub>N), 3.18 (1H, ddd, *J* 22.3, 9.9, 5.4 Hz, CHP), 3.84 (1H, m, 1H from NCH<sub>2</sub>), 4.03 (1H, m, 1H from NCH<sub>2</sub>), 4.25 (4H, m, 2 × OCH<sub>2</sub>), 7.17 (1H, t, *J* 7.4 Hz, Ar-CH), 7.38 (2H, m, 2 × Ar-CH), 7.59 (2H, m, 2 × Ar-CH);  $\delta_{\text{C}}$  (100 MHz, CDCl<sub>3</sub>) 16.4 (2 × CH<sub>3</sub>), 20.4 (CH<sub>2</sub>), 41.9 (CHP, d, *J* 142 Hz), 47.6 (NCH<sub>2</sub>), 62.6 (OCH<sub>2</sub>), 63.2 (OCH<sub>2</sub>), 120.3 (2 × Ar-CH), 125.0 (Ar-CH), 128.9 (2 × Ar-CH), 138.9 (Ar-CN), 168.5 (C(O)); *m/z* (CI mode) 298 (*M* + H, 100). *m/z* (EI mode) 297 (*M*, 100), 269 (20), 240 (10), 160 (35), 132 (60), 119 (90), 105 (20), 77 (60), 55 (55) and 40 (45). (Found: (*M* + H), 298.1211. C<sub>14</sub>H<sub>21</sub>O<sub>4</sub>NP requires *M* + H, 298.1203).

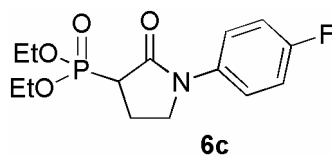

### [1-(4-Fluoro-phenyl)-2-oxo-pyrrolidin-3-yl]-phosphonic acid diethyl ester **6c**

As for general procedure A, a solution of LDA was prepared by the addition of *n*-BuLi (2.21 M in hexanes, 10.1 ml, 22.3 mmol, 2 eq) to a solution of diisopropylamine (3.20 ml, 22.3 mmol, 2 eq) in THF (20 ml), followed by the addition of 1-(4-fluoro-phenyl)-pyrrolidin-2-one (1.75 g, 11.2 mmol, 1 eq) in THF (30 ml) and diethylchlorophosphate (1.60 ml, 11.2 mmol, 1 eq) in THF (6 ml) after purification by flash column chromatography on silica gel eluting with 5% MeOH in EtOAc gave [1-(4-fluoro-phenyl)-2-oxo-pyrrolidin-3-yl]-phosphonic acid diethyl ester **6c** (2.55 g, 8.10 mmol, 73%) as a yellow oil;  $\nu_{\max}$  (neat)/cm<sup>-1</sup> 3435, 2097, 1640 (C(O)), 1510, 1217, 1025, 755, 665 and 441;  $\delta_{\text{H}}$  (400 MHz, CDCl<sub>3</sub>) 1.14 (3H, t, *J* 7.0 Hz, CH<sub>3</sub>), 1.15 (3H, t, *J* 7.0 Hz, CH<sub>3</sub>), 2.34–2.37 (2H, m, CH<sub>2</sub>CH<sub>2</sub>N), 2.96 (1H, ddd, *J*<sub>HP</sub> 22.2, *J* 5.4 and 10.0 Hz, CHP),

3.59 (1H, m, 1H from NCH<sub>2</sub>), 3.80 (1H, m, 1H from NCH<sub>2</sub>), 4.02 (4H, m, 2 × OCH<sub>2</sub>), 6.86 (2H, m, 2 × Ar-CH), 7.34 (2H, m, 2 × Ar-CH); δ<sub>C</sub> (100 MHz, CDCl<sub>3</sub>) 16.4 (2 × OCH<sub>2</sub>CH<sub>3</sub>), 20.3 (CH<sub>2</sub>), 42.2 (d, *J*<sub>CP</sub> 143 Hz, CHP), 47.9 (NCH<sub>2</sub>), 62.5 (OCH<sub>2</sub>), 63.3 (OCH<sub>2</sub>), 115.5 (Ar-C), 115.7 (2 × Ar-CH), 122.1 (2 × Ar-CH), 133.6 (d, *J*<sub>CF</sub> 294 Hz, Ar-CF), 168.5 (C(O)); *m/z* (CI mode) 333 (40), 316 (*M* + H, 100) and 59 (30). *m/z* (EI mode) 315 (*M*, 100), 178 (20), 150 (25), 137 (35) 123 (35), 83 (100) and 49 (30). (Found: (*M* + H), 316.1110. C<sub>14</sub>H<sub>20</sub>O<sub>4</sub>NFP requires *M* + H, 316.1108)

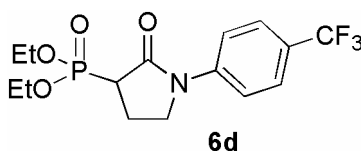

**[2-Oxo-1-(4-trifluoromethyl-phenyl)-pyrrolidin-3-yl]-phosphonic acid diethyl ester  
6d**

As for general procedure A, a solution of LDA was prepared by the addition of *n*-BuLi (2.50 M in hexanes, 7.50 ml, 17.5 mmol, 2 eq) to a solution of diisopropylamine (2.50 ml, 17.5 mmol, 2 eq) in THF (40 ml), followed by the addition of 1-(4-(trifluoromethyl)phenyl)pyrrolidin-2-one (2.00 g, 8.73 mmol, 1 eq) in THF (20 ml) and diethylchlorophosphate (1.30 ml, 8.73 mmol, 1 eq) in THF (5 ml) after purification by flash column chromatography on silica gel eluting with 2% MeOH in EtOAc gave [2-oxo-1-(4-trifluoromethyl-phenyl)-pyrrolidin-3-yl]-phosphonic acid diethyl ester **6d** (2.10 g, 5.75 mmol, 66%) as a yellow oil; ν<sub>max</sub> (neat)/cm<sup>-1</sup> 3431, 2984, 1701 (C(O)), 1615, 1522, 1390, 1323, 1228, 1166, 1120, 1022, 970 and 842; δ<sub>H</sub> (500 MHz, CDCl<sub>3</sub>) 1.33 (3H, t, *J* 6.9 Hz, OCH<sub>2</sub>CH<sub>3</sub>), 1.36 (3H, t, *J* 6.9 Hz, OCH<sub>2</sub>CH<sub>3</sub>), 2.52 (2H, m, CHCH<sub>2</sub>), 3.19 (1H, ddd, *J* 22.5, 9.9, 5.2 Hz, CHP), 3.84 (1H, m, 1H from NCH<sub>2</sub>), 4.04 (1H, q, *J* 8.2 Hz, 1H from NCH<sub>2</sub>), 4.20 (4H, m, 2 × OCH<sub>2</sub>), 7.61 (2H, d, *J* 8.8 Hz, 2 × Ar-CH), 7.75 (2H, d, *J* 8.8 Hz, 2 × Ar-CH); δ<sub>C</sub> (125 MHz, CDCl<sub>3</sub>) 16.4 (2 × CH<sub>3</sub>), 20.2 (CH<sub>2</sub>), 42.8 (CH, d, *J* 135 Hz), 47.3 (NCH<sub>2</sub>), 62.6 (OCH<sub>2</sub>), 63.2 (OCH<sub>2</sub>), 119.5 (2 × Ar-CH), 123.6 (CF<sub>3</sub>, q, *J* 271 Hz), 126.0 (2 × Ar-CH), 127.8 (Ar-CCF<sub>3</sub>, q, *J* 32 Hz), 141.9 (Ar-CN), 169.0 (C(O)); *m/z* (CI mode) 366 (*M* + H, 100). *m/z* (EI mode) 366 (*M* + H, 20), 228 (20), 200 (25), 173

(25), 151 (40), 145 (100), 122 (70), 109 (60), 81 (60) and 54 (75). (Found: (*M*), 365.0990. C<sub>15</sub>H<sub>19</sub>O<sub>4</sub>NF<sub>3</sub>P requires *M*, 365.0998).

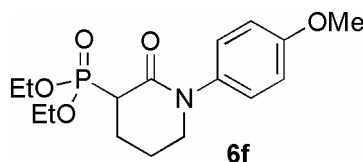

### [1-(4-Methoxy-phenyl)-2-oxo-piperidin-3-yl]-phosphonic acid diethyl ester **6f**

LDA was formed by the addition of *n*-BuLi (2.32 M in hexanes, 3.50 ml, 8.20 mmol, 1.1 eq) to a stirred solution at -78 °C of diisopropylamine (1.20 ml, 8.20 mmol, 1.1 eq) in THF (20 ml) and left for 1 hour. A solution of 1-(4-methoxy-phenyl)-piperidin-2-one (1.31 g, 7.45 mmol, 1 eq) in THF (5 ml) was added and the reaction mixture stirred for another hour at which point it was raised to room temperature and a solution of diethylchlorophosphate (1.18 ml, 8.20 mmol, 1.1 eq) in DMPU (1.00 ml, 8.20 mmol, 1.1 eq) was added and stirred for 1 hour. A second solution of LDA was prepared by the addition of *n*-BuLi (2.32 M in hexanes, 7.10 ml, 16.4 mmol, 2.2 eq) to a stirred solution at -78 °C of diisopropylamine (2.30 ml, 16.4 mmol, 2.2 eq) in THF (20 ml), this was stirred for an hour before being added to the reaction which was stirred at -78 °C for 18 hours. The solution was acidified to pH 1 by the addition of 1M HCl and the aqueous layer was separated and extracted with EtOAc (3 × 50 ml). The combined organic extracts were dried (Na<sub>2</sub>SO<sub>4</sub>) and concentrated *in vacuo* to give the crude product. Purification by flash column chromatography on silica gel eluting with 5% MeOH in EtOAc gave [1-(4-methoxy-phenyl)-2-oxo-piperidin-3-yl]-phosphonic acid diethyl ester **6f** (2.48 g, 7.27 mmol, 97%) as a brown oil;  $\nu_{\max}$  (neat)/cm<sup>-1</sup> 3463, 2937, 1634 (C(O)), 1529, 1445, 1351, 1319, 1245, 1167, 1053, 969, 835, 758, 709 and 664;  $\delta_{\text{H}}$  (400 MHz, CDCl<sub>3</sub>) 1.34 (6H, apparent q, *J* 7.4 Hz, 2 × CH<sub>3</sub>), 1.88 (2H, m, CH<sub>2</sub>CH<sub>2</sub>N), 2.27 (2H, m, CHCH<sub>2</sub>), 3.14 (1H, dt, *J* 26.7, 6.7 Hz, CHP), 3.65 (2H, m, NCH<sub>2</sub>), 3.79 (3H, s, OCH<sub>3</sub>), 4.21 (4H, m, 2 × OCH<sub>2</sub>), 6.91 (2H, d, *J* 8.8 Hz, 2 × Ar-CH), 7.16 (2H, d, *J* 9.1 Hz, 2 × Ar-CH);  $\delta_{\text{C}}$  (100 MHz, CDCl<sub>3</sub>) 16.7 (CH<sub>2</sub>), 18.1 (CH<sub>2</sub>), 20.1 (2 × CH<sub>3</sub>), 36.9 (CHP, d, *J* 137 Hz), 46.7 (NCH<sub>2</sub>), 50.2 (OCH<sub>3</sub>), 56.8 (OCH<sub>2</sub>), 58.0 (OCH<sub>2</sub>), 109.3 (2 × Ar-CH),

122.2 ( $2 \times \text{Ar-CH}$ ), 130.8 (Ar-CN), 153.1 (Ar-CO), 160.2 (C(O));  $m/z$  (CI mode) 342 (M + H, 100), 129 (30) and 128 (60).  $m/z$  (EI mode) 342 (M + H, 15), 341 (30), 204 (35), 202 (20), 175 (30), 149 (100), 133 (20) and 120 (10). (Found: (M), 341.1403.  $\text{C}_{16}\text{H}_{24}\text{O}_5\text{NP}$  requires  $M$ , 341.1387).

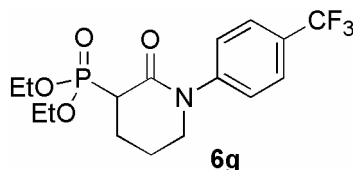

**[2-Oxo-1-(4-trifluoromethyl-phenyl)-piperidin-3-yl]-phosphonic acid diethyl ester **6g****

LDA was formed by the addition of *n*-BuLi (2.32 M in hexanes, 5.50 ml, 12.7 mmol, 1.1 eq) to a stirred solution at -78 °C of diisopropylamine (1.80 ml, 12.7 mmol, 1.1 eq) in THF (30 ml) and left for 1 hour. A solution of 1-(4-trifluoromethyl-phenyl)-piperidin-2-one (2.80 g, 11.5 mmol, 1 eq) in THF (10 ml) was added and the reaction mixture stirred for another hour at which point it was raised to room temperature and a solution of diethylchlorophosphate (1.83 ml, 12.7 mmol, 1.1 eq) in DMPU (1.50 ml, 12.7 mmol, 1.1 eq) was added and the reaction stirred for 1 hour. A second solution of LDA was prepared by the addition of *n*-BuLi (2.32 M in hexanes, 11.0 ml, 25.3 mmol, 2.2 eq) to a stirred solution at -78 °C of diisopropylamine (3.60 ml, 25.3 mmol, 2.2 eq) in THF (30 ml), this was stirred for an hour before being added to the reaction which was then stirred at -78 °C for 18 hours. The solution was acidified to pH 1 by the addition of 1M HCl and the aqueous layer was separated and extracted with EtOAc ( $3 \times 70$  ml). The combined organic extracts were dried ( $\text{Na}_2\text{SO}_4$ ) and concentrated *in vacuo* to give the crude product. Purification by flash column chromatography on silica gel eluting with 10% MeOH in EtOAc gave [2-oxo-1-(4-trifluoromethyl-phenyl)-piperidin-3-yl]-phosphonic acid diethyl ester **6g** (2.83 g, 7.46 mmol, 64%) as a brown solid;  $\nu_{\text{max}}$  (neat)/ $\text{cm}^{-1}$  3461, 2983, 2240, 1656 (C(O)), 1611, 1518, 1482, 1430, 1411, 1325, 1247, 1166, 1126, 1026, 968, 912, 842, 788 and 646;  $\delta_{\text{H}}$  (300 MHz,  $\text{CDCl}_3$ ) 1.28 (6H, apparent q,  $J$  7.0 Hz,  $2 \times \text{OCH}_2\text{CH}_3$ ), 1.68 (1H, m, 1H from  $\text{CH}_2$ ), 2.22 (3H, m, 1H from  $\text{CH}_2$  and 1H from  $\text{CHCH}_2$ ), 3.10 (1H, dt,  $J$  6.6, 26.8 Hz,  $\text{CHP}$ ), 3.63 (2H, m,  $\text{NCH}_2$ ), 4.14 (4H, m,  $2 \times$

OCH<sub>2</sub>), 7.33 (2H, d, *J* 8.5 Hz, 2 × Ar-CH), 7.57 (2H, d, *J* 8.5 Hz, 2 × Ar-CH); δ<sub>C</sub> (75 MHz, CDCl<sub>3</sub>) 16.4 (2 × CH<sub>3</sub>), 21.9 (CH<sub>2</sub>), 23.2 (CH<sub>2</sub>), 42.3 (CH, d, *J* 135 Hz), 51.2 (NCH<sub>2</sub>), 62.1 (OCH<sub>2</sub>), 63.2 (OCH<sub>2</sub>), 123.6 (CF<sub>3</sub>, q, *J* 271 Hz), 126.3 (2 × Ar-CH), 126.3 (2 × Ar-CH), 128.8 (Ar-CCF<sub>3</sub>, q, *J* 32 Hz), 146.2 (Ar-CN), 165.6 (C(O)); *m/z* (CI mode) 380 (*M* + *H*, 100), and 165 (5). *m/z* (EI mode) 380 (*M* + *H*, 20), 241 (20), 214 (25), 187 (60), 165 (100), 145 (30), 137 (12), 109 (15), 91 (20), 81 (21) and 55 (65). (Found: (*M* + *H*), 380.1242. C<sub>16</sub>H<sub>22</sub>O<sub>4</sub>NF<sub>3</sub>P requires *M* + *H*, 380.1233). mp (MeOH) 61-65 °C.

### General Procedure B: Horner Wadsworth Emmons Procedure with K<sub>2</sub>CO<sub>3</sub>

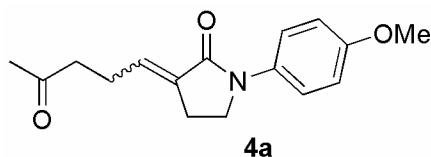

### *E/Z* 1-(4-Methoxy-phenyl)-3-(4-oxo-pentylidene)-pyrrolidin-2-one **4a**

K<sub>2</sub>CO<sub>3</sub> (0.65 g, 4.72 mmol, 1.1 eq) was added to a stirred solution of 18-crown-6 (2.29 g, 8.59 mmol, 2 eq) and 1-(4-methoxy-phenyl)-2-oxo-pyrrolidin-3-yl]-phosphonic acid diethyl ester **6a** (1.40 g, 4.29 mmol, 1 eq) in THF (60 ml) at room temperature and the resulting solution stirred for 2.5 hours. A solution of 4-oxopentanal (0.49 g, 5.15 mmol, 1.2 eq) in THF (50 ml) was then added and the reaction heated to 60 °C and stirred for 18 hours. Aqueous saturated NH<sub>4</sub>Cl (50 ml) was then added and the aqueous layer was separated and extracted with EtOAc (3 × 70 ml). The combined organic extracts were then washed with H<sub>2</sub>O (3 × 100 ml) and dried (Na<sub>2</sub>SO<sub>4</sub>) and concentrated *in vacuo* to give the crude product *E/Z*-1-(4-Methoxy-phenyl)-3-(4-oxo-pentylidene)-pyrrolidin-2-one **4a** (1.17 g, 4.29 mmol, 86%, 1:1 *E/Z* ratio). Elution with 50% EtOAc in petroleum ether (40-60) gave (*E*)-1-(4-methoxy-phenyl)-3-(4-oxo-pentylidene)-pyrrolidin-2-one **4a** (590 mg, 2.16 mmol, 43%) as a yellow oil; ν<sub>max</sub> (neat)/cm<sup>-1</sup> 3325, 2920, 1710 (C(O)), 1660 (C(O)), 1513, 1443, 1397, 1358, 1286, 1250, 1180, 1038, 830 and 690; δ<sub>H</sub> (400 MHz, CDCl<sub>3</sub>) 2.18 (3H, s, CH<sub>3</sub>), 2.45 (2H, q, *J* 7.3 Hz, CHCH<sub>2</sub>), 2.65 (2H, t, *J* 7.2 Hz, C(O)CH<sub>2</sub>), 2.85 (2H, m, CH<sub>2</sub>CH<sub>2</sub>N), 3.82 (3H, s, OCH<sub>3</sub>), 3.85 (2H, t, *J* 7.1 Hz, NCH<sub>2</sub>), 6.46 (1H, m, CH), 6.93 (2H, d, *J* 9.1 Hz, 2 × Ar-CH), 7.62 (2H, d, *J* 9.1 Hz, 2 × Ar-CH);

$\delta_C$  (100 MHz,  $CDCl_3$ ) 21.4 ( $CH_2$ ), 23.2 ( $CH_2$ ), 29.9 ( $CH_3$ ), 42.0 ( $C(O)CH_2$ ), 45.7 ( $NCH_2$ ), 55.4 ( $OCH_3$ ), 113.9 ( $2 \times Ar-CH$ ), 121.4 ( $2 \times Ar-CH$ ), 131.8 ( $Ar-C$ ), 133.1 ( $Ar-C$ ), 133.2 ( $CH$ ), 156.5 ( $Ar-CO$ ), 167.0 ( $C(O)$ ), 207.3 ( $C(O)$ );  $m/z$  (EI mode) 272 ( $M - H$ , 30), 229 (100), 201 (30), 134 (40), 120 (80), 107 (40), 91 (40), 82 (65), 77 (60), 65 (80) and 52 (70). (Found: ( $M$ ), 273.1352.  $C_{16}H_{19}O_3N$  requires  $M$ , 273.1359).

Further elution gave (Z)-1-(4-methoxy-phenyl)-3-(4-oxo-pentylidene)-pyrrolidin-2-one **4a** (0.490 mg, 1.79 mmol, 41%) as a yellow oil;  $\nu_{max}$  (neat)/ $cm^{-1}$  2955, 2915, 1704 ( $C(O)$ ), 1677, 1654 ( $C(O)$ ), 1517, 1407, 1363, 1322, 1248, 1208, 1172, 1030, 825 and 736;  $\delta_H$  (400 MHz,  $CDCl_3$ ) 2.17 (3H, s,  $CH_3$ ), 2.62 (2H, t,  $J$  7.1 Hz,  $C(O)CH_2$ ), 2.79 (2H, m,  $CHCH_2$ ), 3.04 (2H, m,  $CH_2CH_2N$ ), 3.79 (2H, t,  $J$  7.1 Hz,  $NCH_2$ ), 3.81 (3H, s,  $OCH_3$ ), 6.01 (1H, m,  $CH$ ), 6.91 (2H, d,  $J$  9.1 Hz,  $2 \times Ar-CH$ ), 7.57 (2H, d,  $J$  9.1 Hz,  $2 \times Ar-CH$ );  $\delta_C$  (100 MHz,  $CDCl_3$ ) 22.7 ( $CH_2$ ), 25.5 ( $CH_2$ ), 29.7 ( $CH_3$ ), 43.5 ( $C(O)CH_2$ ), 45.8 ( $NCH_2$ ), 55.5 ( $OCH_3$ ), 113.9 ( $2 \times Ar-CH$ ), 121.4 ( $2 \times Ar-CH$ ), 131.0 ( $Ar-C$ ), 132.9 ( $Ar-C$ ), 135.9 ( $CH$ ), 156.5 ( $Ar-CO$ ), 167.2 ( $C(O)$ ), 208.6 ( $C(O)$ );  $m/z$  (CI mode) 274 ( $M + H$ , 100).  $m/z$  (EI mode) 273 ( $M$ , 30), 230 (100), 136 (10), 121 (10), 86 (20) and 49 (30). (Found: ( $M$ ), 273.1361.  $C_{16}H_{19}O_3N$  requires  $M$ , 273.1359).

### General Procedure C, Horner Wadsworth Emmons Procedure with KHMDS

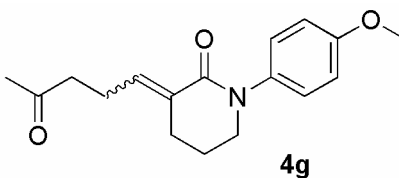

#### (Z)-1-(4-Methoxy-phenyl)-3-(4-oxo-pentylidene)-piperidin-2-one **4g**

KHMDS (0.5 M in toluene, 354 ml, 0.18 mmol, 1.1 eq) was added to a stirred solution of 18-crown-6 (213 mg, 0.80 mmol, 5 eq) and [1-(4-methoxy-phenyl)-2-oxo-piperidin-3-yl]-phosphonic acid diethyl ester **6f** (55 mg, 0.16 mmol, 1 eq) in THF (8 ml) at  $-78^\circ C$  and the resulting solution stirred for 30 min. 4-oxopentanal (21 mg, 0.21 mmol, 1.3 eq) was added in THF (2 ml) and the solution stirred for 18 hours allowing to warm to room temperature. Aqueous saturated  $NH_4Cl$  (15 ml) was then added and the aqueous layer

was separated and extracted with EtOAc (3 × 50 ml). The combined organic extracts were then washed with H<sub>2</sub>O (3 × 100 ml) and dried (Na<sub>2</sub>SO<sub>4</sub>) and concentrated *in vacuo* to give the crude product. Purification by flash column chromatography on silica gel eluting with 50% EtOAc in petroleum ether (40-60) gave (Z)-1-(4-methoxy-phenyl)-3-(4-oxo-pentylidene)-piperidin-2-one **4g** (35 mg, 0.12 mmol, 76%) as a yellow oil;  $\nu_{\max}$  (neat)/cm<sup>-1</sup> 3399, 2933, 1711 (C(O)), 1658 (C(O)), 1621, 1510, 1424, 1363, 1294, 1246, 1187, 1110, 1032, 829 and 863;  $\delta_{\text{H}}$  (500 MHz, CDCl<sub>3</sub>) 1.97 (2H, m, CH<sub>2</sub>), 2.10 (3H, s, CH<sub>3</sub>), 2.48 (2H, t, *J* 5.7 Hz, CH<sub>2</sub>C(O)), 2.55 (2H, t, *J* 5.7 Hz, CCH<sub>2</sub>), 2.79 (2H, q, *J* 7.2 Hz, CHCH<sub>2</sub>), 3.61 (2H, t, *J* 6.0 Hz, NCH<sub>2</sub>), 3.79 (3H, s, OCH<sub>3</sub>), 5.88 (1H, m, CH), 6.91 (2H, d, *J* 8.8 Hz, 2 × Ar-CH), 7.16 (2H, d, *J* 8.8 Hz, 2 × Ar-CH).  $\delta_{\text{C}}$  (125 MHz, CDCl<sub>3</sub>) 23.9 (CH<sub>2</sub>), 24.0 (CH<sub>2</sub>), 29.7 (CH<sub>3</sub>), 32.3 (CH<sub>2</sub>), 43.6 (CH<sub>2</sub>), 51.9 (NCH<sub>2</sub>), 55.6 (OCH<sub>3</sub>), 114.5 (2 × Ar-CH), 127.6 (2 × Ar-CH), 129.7 (Ar-C), 136.2 (C), 140.2 (CH), 158.1 (Ar-CO), 165.3 (C(O)), 208.9 (C(O)). *m/z* (ES<sup>+</sup> mode) 592 (30), 349 (30), 310 (20) and 288 ((*M* + H) 100%). (Found: (*M* + H), 288.1588. C<sub>17</sub>H<sub>22</sub>O<sub>3</sub>N requires *M* + H, 288.1564).

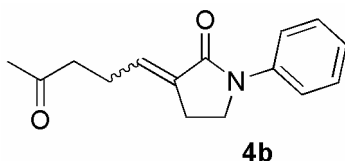

### ***E/Z* 3-(4-Oxo-pentylidene)-1-phenyl-pyrrolidin-2-one **4b****

As for general procedure C, KHMDS (0.5 M in toluene, 9.50 ml, 4.77 mmol, 1.1 eq) was added to a solution of 18-crown-6 (5.73 g, 21.7 mmol, 5 eq) and (2-oxo-1-phenyl-pyrrolidin-3-yl)-phosphonic acid diethyl ester **6b** (1.24 g, 4.34 mmol, 1 eq) in THF (45 ml), followed by addition of 4-oxopentanal (570 mg, 5.65 mmol, 1.3 eq) in THF (60 ml) to give, after work-up gave *E/Z*-3-(4-oxo-pentylidene)-1-phenyl-pyrrolidin-2-one **4b** (663 mg, 2.73 mmol, 63%, 1:2, *E:Z* ratio). Elution with 50% EtOAc in petroleum ether (40-60) gave (*E*)-3-(4-oxo-pentylidene)-1-phenyl-pyrrolidin-2-one **4b** (221 mg, 0.90 mmol, 21%) as a yellow oil;  $\nu_{\max}$  (neat)/cm<sup>-1</sup> 2915, 1706 (C(O)), 1688 (C(O)), 1656, 1597, 1497, 1458, 1393, 1304, 1162, 1097, 893, 757, 698 and 665;  $\delta_{\text{H}}$  (400 MHz, CDCl<sub>3</sub>) 2.17 (3H, s, CH<sub>3</sub>), 2.44 (2H, q, *J* 7.2 Hz, CHCH<sub>2</sub>), 2.64 (2H, m, CH<sub>2</sub>CH<sub>2</sub>N), 2.85 (2H, t, *J* 6.3 Hz,

C(O)CH<sub>2</sub>), 3.87 (2H, t, *J* 6.8 Hz, NCH<sub>2</sub>), 6.48 (1H, m, CH), 7.15 (1H, t, *J* 7.3 Hz, Ar-CH), 7.38 (2H, t, *J* 7.7 Hz, 2 × Ar-CH), 7.71 (2H, d, *J* 8.3 Hz, 2 × Ar-CH); δ<sub>C</sub> (100 MHz, CDCl<sub>3</sub>) 21.4 (CH<sub>2</sub>), 23.2 (CH<sub>2</sub>), 30.1 (CH<sub>3</sub>), 42.0 (C(O)CH<sub>2</sub>), 45.4 (NCH<sub>2</sub>), 119.7 (2 × Ar-CH), 124.6 (Ar-CH), 128.8 (2 × Ar-CH), 132.4 (Ar-C), 133.1 (CH), 139.7 (C), 167.3 (C(O)), 207.3 (C(O)); *m/z* (CI mode) 244 (*M* + H, 100), 200 (20), 116 (10), 91 (10), and 70 (10). (Found: (*M* + H), 244.1333. C<sub>15</sub>H<sub>18</sub>O<sub>2</sub>N requires *M* + H, 244.1332)

Further elution gave (*Z*)-3-(4-oxo-pentylidene)-1-phenyl-pyrrolidin-2-one (444 mg, 1.83 mmol, 42%) as yellow oil; δ<sub>H</sub> (400 MHz, CDCl<sub>3</sub>) 2.17 (3H, s, CH<sub>3</sub>), 2.63 (2H, t, *J* 7.1 Hz, C(O)CH<sub>2</sub>), 2.80 (2H, m, CH<sub>2</sub>CH<sub>2</sub>N), 3.06 (2H, m, CHCH<sub>2</sub>), 3.82 (2H, t, *J* 6.8 Hz, NCH<sub>2</sub>), 6.05 (1H, m, CH), 7.16 (1H, t, *J* 7.3 Hz, Ar-CH), 7.38 (2H, t, *J* 7.7 Hz, 2 × Ar-CH), 7.67 (2H, d, *J* 8.3 Hz, 2 × Ar-CH); δ<sub>C</sub> (100 MHz, CDCl<sub>3</sub>) 21.4 (CH<sub>2</sub>), 25.6 (CH<sub>2</sub>), 29.7 (CH<sub>3</sub>), 43.5 (C(O)CH<sub>2</sub>), 45.5 (NCH<sub>2</sub>), 119.7 (2 × Ar-CH), 124.6 (Ar-CH), 128.8 (2 × Ar-CH), 131.0 (Ar-C), 136.6 (CH), 139.7 (C), 167.5 (C(O)), 208.5 (C(O));

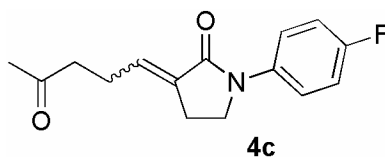

#### ***E/Z* 1-(4-Fluoro-phenyl)-3-[4-oxo-pentylidene]-pyrrolidin-2-one 4c**

As for general procedure C, KHMDS (0.5 M in toluene, 10.0 ml, 4.88 mmol, 1.1 eq) was added to a solution of 18-crown-6 (5.87 g, 22.2 mmol, 5 eq) and [1-(4-fluoro-phenyl)-2-oxo-pyrrolidin-3-yl]-phosphonic acid diethyl ester **6c** (1.40 g, 4.44 mmol, 1 eq) in THF (60 ml), followed by addition of 4-oxopentanal (680 mg, 5.77 mmol, 1.3 eq) in THF (50 ml) to give after work-up gave crude *E/Z*-1-(4-fluoro-phenyl)-3-[4-oxo-pentylidene]-pyrrolidin-2-one **4c** (0.49 g, 1.87 mmol, 42%, 1:2, *E*:*Z* ratio (77% on recovered starting material). Elution with 50% EtOAc in petroleum ether (40-60) gave (*E*)-1-(4-fluoro-phenyl)-3-[4-oxo-pentylidene]-pyrrolidin-2-one **4c** (165 mg, 0.63 mmol, 14%) as a yellow oil; ν<sub>max</sub> (neat)/cm<sup>-1</sup> 2916, 1715 (C(O)), 1656 (C(O)), 1510, 1427, 1400, 1359, 1314, 1229, 1160, 831 and 665; δ<sub>H</sub> (400 MHz, CDCl<sub>3</sub>) 2.16 (3H, s, CH<sub>3</sub>), 2.46 (2H, q, *J* 7.3 Hz, CHCH<sub>2</sub>), 2.66 (2H, t, *J* 7.2 Hz, C(O)CH<sub>2</sub>), 2.87 (2H, m, CH<sub>2</sub>CH<sub>2</sub>N), 3.86 (2H, t,



$J$  7.3 Hz,  $\text{NCH}_2$ ), 6.48 (1H, m,  $\text{CH}$ ), 7.08 (2H, m,  $2 \times \text{Ar-CH}$ ), 7.68 (2H, m,  $2 \times \text{Ar-CH}$ );  $\delta_{\text{C}}$  (100 MHz,  $\text{CDCl}_3$ ) 21.4 ( $\text{CH}_2$ ), 23.2 ( $\text{CH}_2$ ), 30.1 ( $\text{CH}_3$ ), 41.9 ( $\text{C(O)CH}_2$ ), 45.6 ( $\text{NCH}_2$ ), 115.5 ( $2 \times \text{Ar-CH}$ ), 121.3 ( $2 \times \text{Ar-CH}$ ), 132.5 ( $\text{Ar-C}$ ), 132.8 ( $\text{CH}$ ), 135.8 ( $\text{C}$ ), 159.5 (d,  $J_{\text{CF}}$  244.5 Hz,  $\text{Ar-CF}$ ), 167.2 ( $\text{C(O)}$ ), 207.3 ( $\text{C(O)}$ );  $m/z$  (CI mode) 262 ( $M + \text{H}$ , 100), 218 (20) and 85 (80). (Found: ( $M + \text{H}$ ), 262.1238.  $\text{C}_{15}\text{H}_{17}\text{O}_2\text{NF}$  requires  $M + \text{H}$ , 262.1238)

Further elution gave (*Z*)-1-(4-fluoro-phenyl)-3-[4-oxo-pentylidene]-pyrrolidin-2-one (321 mg, 1.23 mmol, 27%) as a yellow oil;  $\delta_{\text{H}}$  (400 MHz,  $\text{CDCl}_3$ ) 2.17 (3H, s,  $\text{CH}_3$ ), 2.63 (2H, t,  $J$  7.1 Hz,  $\text{C(O)CH}_2$ ), 2.81 (2H, m,  $\text{CHCH}_2$ ), 3.04 (2H, m,  $\text{CH}_2\text{CH}_2\text{N}$ ), 3.80 (2H, t,  $J$  7.3 Hz,  $\text{NCH}_2$ ), 6.05 (1H, m,  $\text{CH}$ ), 7.07 (2H, m,  $2 \times \text{Ar-CH}$ ), 7.64 (2H, m,  $2 \times \text{Ar-CH}$ );  $\delta_{\text{C}}$  (100 MHz,  $\text{CDCl}_3$ ) 21.2 ( $\text{CH}_3$ ), 25.4 ( $\text{CH}_2$ ), 29.7 ( $\text{CH}_2$ ), 43.4 ( $\text{C(O)CH}_2$ ), 45.7 ( $\text{NCH}_2$ ), 115.4 ( $2 \times \text{Ar-CH}$ ), 121.3 ( $2 \times \text{Ar-CH}$ ), 130.7 ( $\text{Ar-C}$ ), 135.8 ( $\text{C}$ ), 136.7 ( $\text{CH}$ ), 159.5 (d,  $J_{\text{CF}}$  244 Hz,  $\text{Ar-CF}$ ), 167.3 ( $\text{C(O)}$ ), 208.4 ( $\text{C(O)}$ );

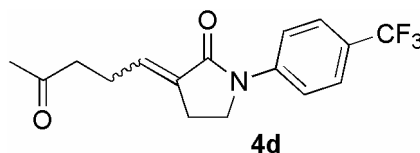

### ***E/Z* 3-(4-Oxo-pentylidene)-1-(4-trifluoromethyl-phenyl)-pyrrolidin-2-one 4d**

As for general procedure B,  $\text{K}_2\text{CO}_3$  (0.20 g, 1.43 mmol, 1.3 eq) was added to a solution of 18-crown-6 (0.87 g, 3.29 mmol, 3 eq) and [2-oxo-1-(4-trifluoromethyl-phenyl)-pyrrolidin-3-yl]-phosphonic acid diethyl ester **6d** (0.40 g, 1.10 mmol, 1 eq) in THF (20 ml), followed by addition of 4-oxopentanal (0.22 g, 2.20 mmol, 2 eq) in THF (20 ml).to give, after work up gave *E/Z*-3-(4-oxo-pentylidene)-1-(4-trifluoromethyl-phenyl)-pyrrolidin-2-one **4d** (0.24 g, 0.77 mmol, 69%, 1:2, *E:Z* ratio). Elution with 50% EtOAc in petroleum ether (40-60) gave (*E*)-3-(4-oxo-pentylidene)-1-(4-trifluoromethyl-phenyl)-pyrrolidin-2-one (7 mg, 0.22 mmol, 20%) as a yellow oil;  $\nu_{\text{max}}$  (neat)/ $\text{cm}^{-1}$  3408, 2916, 1711 ( $\text{C(O)}$ ), 1667 ( $\text{C(O)}$ ), 1616, 1521, 1430, 1395, 1326, 1228, 1197, 1165, 1118, 1076, 1014, 951, 844, 754 and 698;  $\delta_{\text{H}}$  (400 MHz,  $\text{CDCl}_3$ ) 2.11 (3H, s,  $\text{CH}_3$ ), 2.39 (2H, q,  $J$  7.5 Hz,  $\text{CH}_2\text{CH}$ ), 2.59 (2H, t,  $J$  7.1 Hz,  $\text{C(O)CH}_2$ ), 2.83 (2H, m,  $\text{CH}_2\text{CH}_2\text{N}$ ), 3.83 (2H, t,  $J$

7.5 Hz,  $\text{CH}_2\text{N}$ ), 6.46 (1H, m,  $\text{CH}$ ), 7.56 (2H, d,  $J$  8.8 Hz,  $2 \times \text{Ar-CH}$ ), 7.80 (2H, d,  $J$  8.8 Hz,  $2 \times \text{Ar-CH}$ );  $\delta_{\text{C}}$  (125 MHz,  $\text{CDCl}_3$ ) 21.3 ( $\text{CH}_2$ ), 23.2 ( $\text{CH}_2$ ), 30.0 ( $\text{CH}_3$ ), 41.8 ( $\text{CH}_2$ ), 45.1 ( $\text{NCH}_2$ ), 118.9 ( $2 \times \text{Ar-CH}$ ), 124.5 ( $\text{CCF}_3$ , q,  $J$  271 Hz), 126.0 ( $2 \times \text{Ar-CH}$ ), 126.2 ( $\text{Ar-CCF}_3$ , q,  $J$  32 Hz), 132.6 (C), 133.8 (CH), 142.7 (Ar-CN), 167.8 ( $\text{C(O)}$ ), 207.1 ( $\text{C(O)}$ );  $m/z$  (CI mode) 312 ( $M + \text{H}$ , 100).  $m/z$  (EI mode) 311 ( $M$ , 60), 268 (80), 224 (10), 172 (10), 145 (10), 81 (10), 67 (100) and 43 (60). (Found: ( $M + \text{H}$ ), 312.1209.  $\text{C}_{16}\text{H}_{17}\text{O}_2\text{NF}_3$  requires  $M + \text{H}$ , 312.1206).

Further elution gave (*Z*)-3-(4-oxo-pentylidene)-1-(4-trifluoromethyl-phenyl)-pyrrolidin-2-one (17 mg, 0.54 mmol, 49%) as a yellow oil;  $\nu_{\text{max}}$  (neat)/ $\text{cm}^{-1}$  3406, 2904, 1711 ( $\text{C(O)}$ ), 1686 ( $\text{C(O)}$ ), 1657, 1615, 1521, 1476, 1428, 1391, 1326, 1196, 1164, 1184, 1071, 1014, 948, 896, 843, 755 and 665;  $\delta_{\text{H}}$  (500 MHz,  $\text{CDCl}_3$ ) 2.16 (3H, s,  $\text{CH}_3$ ), 2.62 (2H, t,  $J$  7.0 Hz,  $\text{C(O)CH}_2$ ), 2.83 (2H, t,  $J$  6.0 Hz,  $\text{CCH}_2$ ), 3.04 (2H, q,  $J$  7.2 Hz,  $\text{CH}_2\text{CH}$ ), 3.83 (2H, t,  $J$  7.0 Hz,  $\text{NCH}_2$ ), 6.10 (1H, m, CH), 7.62 (2H, d,  $J$  8.5 Hz,  $2 \times \text{Ar-CH}$ ), 7.82 (2H, d,  $J$  8.5 Hz,  $2 \times \text{Ar-CH}$ );  $\delta_{\text{C}}$  (125 MHz,  $\text{CDCl}_3$ ) 21.5 ( $\text{CH}_2$ ), 25.3 ( $\text{CH}_2$ ), 29.7 ( $\text{CH}_3$ ), 43.2 ( $\text{CH}_2$ ), 45.2 ( $\text{NCH}_2$ ), 117.5 ( $2 \times \text{Ar-CH}$ ), 124.5 ( $\text{CCF}_3$ , q,  $J$  271 Hz), 125.9 ( $2 \times \text{Ar-CH}$ ), 126.2 (Ar- $\text{CCF}_3$ , q,  $J$  32 Hz), 130.4 (C), 138.0 (CH), 142.7 (Ar-CN), 167.7 ( $\text{C(O)}$ ), 208.2 ( $\text{C(O)}$ );  $m/z$  (CI mode) 312 ( $M + \text{H}$ , 100).  $m/z$  (EI mode) 310 ( $M - \text{H}$ , 30), 239 (30), 225 (20), 171 (40), 144 (50), 94 (20), 80 (40), 66 (100) and 48 (70). (Found: ( $M$ ), 311.1137.  $\text{C}_{16}\text{H}_{17}\text{O}_2\text{NF}_3$  requires  $M$ , 311.1128).

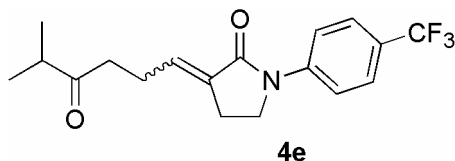

***E/Z* 3-(5-Methyl-4-oxo-hexylidene)-1-(4-trifluoromethyl-phenyl)-pyrrolidin-2-one 4e**

DBU (82  $\mu\text{l}$ , 0.55 mmol, 1 eq) was added to a stirred solution of [2-oxo-1-(4-trifluoromethyl-phenyl)-pyrrolidin-3-yl]-phosphonic acid diethyl ester **6d** (0.20 g, 0.55 mmol, 1 eq) and LiCl (23 mg, 0.55 mmol, 1 eq) in  $\text{CH}_3\text{CN}$  (5 ml) at room temperature and the solution stirred for 10 min. 5-Methyl-4-oxohexanal (77 mg, 0.61 mmol, 1.1 eq) in  $\text{CH}_3\text{CN}$  (5 ml) was then added and the reaction left to stir for 18 hours at room

temperature followed by heating at reflux for 5 hours. The reaction was quenched with the addition of aqueous saturated solution of  $\text{NH}_4\text{Cl}$  (5 ml) and the aqueous layer separated and extracted with EtOAc ( $3 \times 10$  ml). The combined organic extracts were dried ( $\text{Na}_2\text{SO}_4$ ) and concentrated *in vacuo* to give the crude product. Purification by flash column chromatography on silica gel eluting with a solvent gradient of 50% EtOAc in petroleum ether (40-60) to give *E/Z*-3-(5-methyl-4-oxo-hexylidene)-1-(4-trifluoromethyl-phenyl)-pyrrolidin-2-one **4e** (12 mg, 0.35 mmol, 64%) as a white solid.

Characterisation as a mixture of double bond isomers;

$\nu_{\text{max}}$  (neat)/ $\text{cm}^{-1}$  3400, 3019, 2925, 2853, 2360, 1701 (C(O)), 1664 (C(O)), 1615, 1521, 1466, 1443, 1389, 1323, 1216, 1166, 1120, 1068, 841 and 665;  $\delta_{\text{H}}$  (400 MHz,  $\text{CDCl}_3$ ) 1.03 (6H, d,  $J$  3.3 Hz,  $2 \times \text{CH}_3$ ), 1.04 (6H, d,  $J$  3.3 Hz,  $2 \times \text{CH}_3$ ), 2.40 (2H, q,  $J$  7.2 Hz,  $\text{CH}_2\text{CH}$ ), 2.57 (6H, m,  $2 \times \text{CHC}(\text{O})$  and  $2 \times \text{C}(\text{O})\text{CH}_2$ ), 2.76 (2H, m,  $\text{CH}_2\text{CH}_2\text{N}$ ), 2.84 (2H, m,  $\text{CH}_2\text{CH}_2\text{N}$ ), 2.95 (2H, q,  $J$  7.0 Hz,  $\text{CH}_2\text{CH}$ ), 3.76 (2H, t,  $J$  7.1 Hz,  $\text{NCH}_2$ ), 3.83 (2H, t,  $J$  7.1 Hz,  $\text{NCH}_2$ ), 6.10 (1H, m,  $\text{CHC}$ ), 6.46 (1H, m,  $\text{CHC}$ ), 7.55 (2H, dd,  $J$  8.7, 2.9 Hz,  $2 \times \text{Ar-CH}$ ), 7.78 (2H, dd,  $J$  17.8, 8.5 Hz,  $2 \times \text{Ar-CH}$ );  $\delta_{\text{C}}$  (100 MHz,  $\text{CDCl}_3$ ) 18.2 ( $4 \times \text{CH}_3$ ), 21.3 ( $\text{CH}_2$ ), 21.5 ( $\text{CH}_2$ ), 23.4 ( $\text{CH}_2$ ), 25.3 ( $\text{CH}_2$ ), 38.5 ( $\text{C}(\text{O})\text{CH}_2$ ), 39.9 ( $\text{C}(\text{O})\text{CH}_2$ ), 40.7 ( $2 \times \text{CCH}$ ), 41.0 ( $2 \times \text{C}(\text{O})\text{CH}$ ), 45.1 ( $\text{NCH}_2$ ), 45.2 ( $\text{NCH}_2$ ), 118.9 ( $4 \times \text{Ar-CH}$ ), 126.5 ( $4 \times \text{Ar-CH}$ ), 130.1 ( $2 \times \text{C}$ ), 132.4 ( $2 \times \text{Ar-CN}$ ), 134.1 ( $\text{CHC}$ ), 138.5 ( $\text{CHC}$ ), 165.0 ( $\text{C}(\text{O})$ ), 167.7 ( $\text{C}(\text{O})$ ), 213.2 ( $\text{C}(\text{O})$ ), 214.0 ( $\text{C}(\text{O})$ );  $m/z$  (CI mode) 340 ( $M + \text{H}$ , 100).  $m/z$  (EI mode) 339 ( $M$ , 5), 268 (20), 172 (50), 145 (60), 109 (20), 84 (100), 67 (40) and 48 (30). (Found: ( $M$ ), 339.1442.  $\text{C}_{18}\text{H}_{20}\text{O}_2\text{NF}_3$  requires  $M$ , 339.1441).

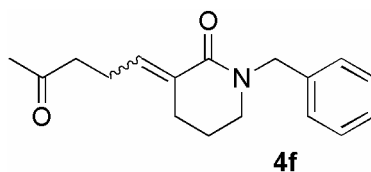

#### ***E/Z* 1-Benzyl-3-(4-oxo-pentylidene)-piperidin-2-one 4f**

As for general procedure B,  $\text{K}_2\text{CO}_3$  (0.24 g, 1.69 mmol, 1.1 eq) was added to a solution of 18-crown-6 (0.45 g, 1.69 mmol, 1.1 eq) and (1-benzyl-2-oxo-piperidin-3-yl)-

phosphonic acid diethyl ester **6e** (0.50 g, 1.54 mmol, 1 eq) in THF (80 ml), followed by addition of 4-oxopentanal (0.19 g, 1.85 mmol, 1.2 eq) in THF (20 ml).to give, after work up and purification, *E/Z* 1-Benzyl-3-(4-oxo-pentylidene)-piperidin-2-one **4f** (0.117 g, 0.45 mmol, 27%, 6:1, *E:Z* (56% based on recovered starting material). Elution with 50% EtOAc in petroleum ether (40-60) gave (*E*)-1-benzyl-3-(4-oxo-pentylidene)-piperidin-2-one **4f** (93 mg, 0.34 mmol, 22%) as a yellow oil;  $\nu_{\max}$  (neat)/cm<sup>-1</sup> 3416, 2930, 1713 (C(O)), 1659 (C(O)), 1611, 1491, 1452, 1353, 1261, 1201, 1164, 1076, 734 and 701;  $\delta_{\text{H}}$  (100 MHz, CDCl<sub>3</sub>) 1.75 (2H, m, CH<sub>2</sub>CH<sub>2</sub>N), 2.09 (3H, s, CH<sub>3</sub>), 2.33 (2H, q, *J* 7.2 Hz, CH<sub>2</sub>CH), 2.45 (2H, t, *J* 6.9 Hz, CH<sub>2</sub>C(O)), 2.54 (2H, t, *J* 7.4 Hz, CH<sub>2</sub>CH<sub>2</sub>CH<sub>2</sub>N), 3.20 (NCH<sub>2</sub>), 4.57 (2H, s, NCH<sub>2</sub>Ph), 6.73 (1H, m, CH), 7.22 (5H, m, 5 × Ar-CH);  $\delta_{\text{C}}$  (100 MHz, CDCl<sub>3</sub>) 22.1 (CH<sub>2</sub>), 22.6 (CH<sub>2</sub>), 24.7 (CH<sub>3</sub>), 30.1 (CH<sub>2</sub>), 42.2 (CH<sub>2</sub>), 47.2 (NCH<sub>2</sub>), 50.9 (NCH<sub>2</sub>Ph), 127.3 (Ar-C), 128.0 (2 × Ar-CH), 128.1 (2 × Ar-CH), 129.8 (Ar-CH), 136.7 (CH), 137.4 (C), 164.9 (C(O)), 207.6 (C(O)); *m/z* (CI mode) 272 (*M* + H, 100). *m/z* (EI mode) 272 (*M* + H, 2), 228 (5), 91 (100) and 65 (10). (Found: (*M*), 271.1563. C<sub>17</sub>H<sub>21</sub>O<sub>2</sub>N requires *M*, 271.1567).

Further elution gave (*Z*)-1-benzyl-3-(4-oxo-pentylidene)-piperidin-2-one **4f** (24 mg, 0.09 mmol, 7%) as a yellow oil;  $\nu_{\max}$  (neat)/cm<sup>-1</sup> 3419, 2929, 1713 (C(O)), 1662 (C(O)), 1610, 1490, 1453, 1357, 1261, 1201, 1164, 1077, 736 and 701;  $\delta_{\text{H}}$  (400 MHz, CDCl<sub>3</sub>) 1.75 (2H, m, CH<sub>2</sub>CH<sub>2</sub>N), 2.09 (3H, s, CH<sub>3</sub>), 2.35 (2H, m, CH<sub>2</sub>CH<sub>2</sub>CH<sub>2</sub>N), 2.56 (2H, t, *J* 7.1 Hz, CH<sub>2</sub>C(O)), 2.87 (2H, q, *J* 7.2 Hz, CH<sub>2</sub>CH), 3.16 (2H, t, *J* 6.2 Hz, NCH<sub>2</sub>), 4.55 (2H, s, NCH<sub>2</sub>Ph), 5.73 (1H, m, CH), 7.23 (5H, m, 5 × Ar-CH);  $\delta_{\text{C}}$  (100 MHz, CDCl<sub>3</sub>) 23.5 (CH<sub>2</sub>), 24.0 (CH<sub>2</sub>), 29.6 (CH<sub>3</sub>), 32.4 (CH<sub>2</sub>), 43.7 (CH<sub>2</sub>), 47.4 (NCH<sub>2</sub>), 49.9 (NCH<sub>2</sub>Ph), 127.3 (Ar-C), 127.9 (2 × Ar-CH), 128.4 (2 × Ar-CH), 129.6 (Ar-CH), 137.4 (CH), 139.4 (C), 165.1 (C(O)), 208.9 (C(O)). *m/z* (CI mode) 272 (*M* + H, 100), 178 (10), 90 (20) and 84 (18). *m/z* (EI mode) 271 (*M*, 5), 227 (20), 90 (60), 64 (30) and 48 (85). (Found: (*M*), 271.1568. C<sub>17</sub>H<sub>21</sub>O<sub>2</sub>N requires *M*, 271.1567).

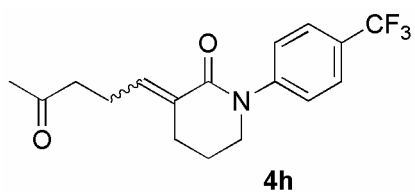

***E/Z* 3-(4-Oxo-pentylidene)-1-(4-trifluoromethyl-phenyl)-piperidin-2-one **4h****

As for general procedure C, KHMDS (0.5 M in toluene, 5.80 ml, 2.90 mmol, 1.1 eq) was added to a solution of 18-crown-6 (3.50 g, 13.2 mmol, 5 eq) and (1.00 g, 2.64 mmol, 1 eq) in THF (40 ml), followed by addition of 4-oxopentanal (355 mg, 3.43 mmol, 1.3 eq) in THF (40 ml) to give after work-up and purification gave *E/Z* 3-(4-Oxo-pentylidene)-1-(4-trifluoromethyl-phenyl)-piperidin-2-one **4h** (328 mg, 1.00 mmol, 41%, 1:5, *E:Z*, (55% based on recovered starting material). Elution with 40% EtOAc in petroleum ether (40-60) gave (*E*)-3-(4-oxo-pentylidene)-1-(4-trifluoromethyl-phenyl)-piperidin-2-one **4h** (81 mg, 0.25 mmol, 9%) as a yellow oil;  $\nu_{\max}$  (neat)/ $\text{cm}^{-1}$  3413, 292, 1716 (C(O)), 1666 (C(O)), 1612, 1518, 1409, 1356, 1164, 1121, 1067, 1017, 845, 732 and 665;  $\delta_{\text{H}}$  (400 MHz,  $\text{CDCl}_3$ ) 1.97 (2H, m,  $\text{CH}_2\text{CH}_2\text{CH}_2\text{N}$ ), 2.10 (3H, s,  $\text{CH}_3$ ), 2.34 (2H, q,  $J$  7.3 Hz,  $\text{CH}_2\text{CH}$ ), 2.58 (4H, m,  $\text{CH}_2\text{C(O)}$  and  $\text{CH}_2\text{CH}_2\text{N}$ ), 3.67 (2H, m,  $\text{NCH}_2$ ), 6.78 (1H, m,  $\text{CH}$ ), 7.35 (2H, m,  $2 \times \text{Ar-CH}$ ), 7.58 (2H, m,  $2 \times \text{Ar-CH}$ );  $\delta_{\text{C}}$  (100 MHz,  $\text{CDCl}_3$ ) 22.2 ( $\text{CH}_2$ ), 22.9 ( $\text{CH}_2$ ), 24.7 ( $\text{CH}_3$ ), 30.0 ( $\text{CH}_2$ ), 41.9 ( $\text{CH}$ ), 50.7 ( $\text{NCH}_2$ ), 124.0 ( $\text{CCF}_3$ , q,  $J$  281 Hz), 125.9 ( $4 \times \text{Ar-CH}$ ), 128.0 ( $\text{Ar-CCF}_3$ , q,  $J$  32 Hz), 129.6 ( $\text{Ar-CN}$ ), 138.6 ( $\text{CH}$ ), 146.7 (C), 164.8 (C(O)), 207.4 (C(O));  $m/z$  (CI mode) 326 ( $M + \text{H}$ , 100), 290 (10) and 118 (5).  $m/z$  (EI mode) 326 ( $M + \text{H}$ , 10), 254 (30), 218 (10), 174 (20), 145 (50) and 45 (20). (Found: ( $M$ ), 325.1290.  $\text{C}_{17}\text{H}_{18}\text{O}_2\text{NF}_3$  requires  $M$ , 325.1284).

Further elution gave (*Z*)-3-(4-oxo-pentylidene)-1-(4-trifluoromethyl-phenyl)-piperidin-2-one **4h** (278 mg, 0.86 mmol, 32%) as a yellow oil;  $\delta_{\text{H}}$  (200 MHz,  $\text{CDCl}_3$ ) 1.84-2.04 (2H, m,  $\text{CH}_2$ ), 1.97 (3H, s,  $\text{CH}_3$ ), 2.40-2.49 (4H, m,  $2 \times \text{CH}_2$ ), 2.69 (2H, m,  $\text{CHCH}_2$ ), 3.54 (2H, t,  $J$  6.0 Hz,  $\text{NCH}_2$ ), 5.80 (1H, m,  $\text{CH}$ ), 7.27 (2H, d,  $J$  8.2 Hz,  $2 \times \text{Ar-CH}$ ), 7.50 (2H, d,  $J$  8.3 Hz,  $2 \times \text{Ar-CH}$ );  $\delta_{\text{C}}$  (125 MHz,  $\text{CDCl}_3$ ) 23.7 ( $\text{CH}_2$ ), 24.1 ( $\text{CH}_2$ ), 29.7 ( $\text{CH}_3$ ), 31.9 ( $\text{CH}_2$ ), 43.4 ( $\text{CH}_2$ ), 51.1 ( $\text{NCH}_2$ ), 123.9 ( $\text{CCF}_3$ , q,  $J$  272 Hz), 126.2 ( $2 \times \text{Ar-CH}$ ), 126.5 ( $2 \times \text{Ar-CH}$ ), 128.5 ( $\text{Ar-CCF}_3$ , q,  $J$  32 Hz), 129.0 (C), 129.2 ( $\text{Ar-CN}$ ), 141.5 ( $\text{CH}$ ), 146.3 ( $\text{Ar-CO}$ ), 165.2 (C(O)), 208.6 (C(O));

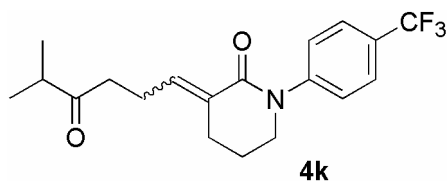

***E/Z* 3-(5-Methyl-4-oxo-hexylidene)-1-(4-trifluoromethyl-phenyl)-piperidin-2-one **4k****

As for general procedure C, KHMDS (0.5 M in toluene, 5.80 ml, 2.90 mmol, 1.1 eq) was added to a solution of 18-crown-6 (3.48 g, 13.2 mmol, 5 eq) and [2-oxo-1-(4-trifluoromethyl-phenyl)-piperidin-3-yl]-phosphonic acid diethyl ester **6g** (1.00 g, 2.64 mmol, 1 eq) in THF (50 ml). Followed by addition of 5-methyl-4-oxohexanal (44 mg, 3.43 mmol, 1.3 eq) in THF (40 ml) to give after work-up gave *E/Z* 3-(5-methyl-4-oxo-hexylidene)-1-(4-trifluoromethyl-phenyl)-piperidin-2-one **4k** (518 mg, 1.47 mmol, 56%, 1:5, *E:Z* ratio). Elution with 50% EtOAc in petroleum ether (40-60) gave (*E*)-3-(5-Methyl-4-oxo-hexylidene)-1-(4-trifluoromethyl-phenyl)-piperidin-2-one **4k** (88 mg, 0.25 mmol, 9%) as a brown oil;  $\nu_{\max}$  (neat)/cm<sup>-1</sup> 3511, 2969, 2245, 1709 (C(O)), 1625 (C(O)), 1518, 1449, 1423, 1408, 1325, 1165, 1122, 1068, 1018, 919, 836, 760 and 685;  $\delta_{\text{H}}$  (500 MHz, CDCl<sub>3</sub>) 1.11 (6H, d, *J* 6.8 Hz, 2 × CH<sub>3</sub>), 2.05 (2H, m, CH<sub>2</sub>), 2.45 (2H, q, *J* 7.5 Hz, CHCH<sub>2</sub>), 2.61 (1H, m, CH(CH<sub>3</sub>)), 2.67 (4H, m, 2H from CH<sub>2</sub>C and 2H from C(O)CH<sub>2</sub>), 3.74 (2H, t, *J* 6.0 Hz, NCH<sub>2</sub>), 6.85 (1H, m, CHC), 7.43 (2H, d, *J* 8.2 Hz, 2 × Ar-CH), 7.63 (2H, d, *J* 8.2 Hz, 2 × Ar-CH); *m/z* (CI mode) 354 (*M* + H, 100) and 282 (10). *m/z* (EI mode) 353 (*M*, 5), 281 (40), 253 (10), 173 (10), 144 (30), 125 (10), 78 (20) and 48 (100). (Found: (*M*), 353.1595. C<sub>19</sub>H<sub>22</sub>O<sub>2</sub>NF<sub>3</sub> requires *M*, 353.1597).

Further elution gave (*Z*)-3-(5-methyl-4-oxo-hexylidene)-1-(4-trifluoromethyl-phenyl)-piperidin-2-one **4k** (440 mg, 1.25 mmol, 45%) as a yellow oil;  $\delta_{\text{H}}$  (400 MHz, CDCl<sub>3</sub>) 1.07 (6H, d, *J* 6.8 Hz, 2 × CH<sub>3</sub>), 2.02 (2H, m, CH<sub>2</sub>), 2.56-2.66 (5H, m, 2H from C(O)CH<sub>2</sub>, 2H from CCH<sub>2</sub>, 1H from CH), 2.84 (2H, q, *J* 7.0 Hz, CHCH<sub>2</sub>), 3.69 (2H, t, *J* 6.0 Hz, NCH<sub>2</sub>), 5.79 (1H, m, CH), 7.42 (2H, d, *J* 8.3 Hz, 2 × Ar-CH), 7.65 (2H, d, *J* 8.3 Hz, 2 × Ar-CH);  $\delta_{\text{C}}$  (100 MHz, CDCl<sub>3</sub>) 18.3 (2 × CH<sub>3</sub>), 23.4 (CH<sub>2</sub>), 24.0 (CH<sub>2</sub>), 31.9 (CH<sub>2</sub>), 40.0 (CH<sub>2</sub>), 40.1 (CH), 51.1 (NCH<sub>2</sub>), 124.0 (CF<sub>3</sub>, q, *J* 271 Hz), 126.1 (2 × Ar-

CH), 126.5 (2 × Ar-CH), 128.5 (Ar-CCF<sub>3</sub>, q, *J* 32 Hz), 128.9 (Ar-C), 142.0 (CH), 146.4 (C), 165.2 (C(O)), 214.3 (C(O));

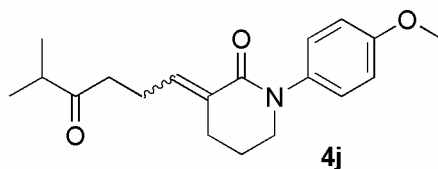

**(Z)-1-(4-Methoxy-phenyl)-3-(5-methyl-4-oxo-hexylidene)-piperidin-2-one 4j**

As for general procedure C, KHMDS (0.5 M in toluene, 6.00 ml, 2.98 mmol, 1.1 eq) was added to a solution of 18-crown-6 (3.60 g, 13.6 mmol, 5 eq) and [1-(4-methoxy-phenyl)-2-oxo-piperidin-3-yl]-phosphonic acid diethyl ester **6f** (924 mg, 2.71 mmol, 1 eq) in THF (50 ml), followed by addition of 5-methyl-4-oxohexanal (451 mg, 3.52 mmol, 1.3 eq) in THF (50 ml) to give after work-up and purification (Z)-1-(4-methoxy-phenyl)-3-(5-methyl-4-oxo-hexylidene)-piperidin-2-one **4j** (220 mg, 0.70 mmol, 26%) as a yellow oil;  $\nu_{\text{max}}$  (neat)/cm<sup>-1</sup> 2935, 2361, 1708 (C(O)), 1661 (C(O)), 1607, 1511, 1412, 1294, 1246, 1188, 1034, 827 and 665;  $\delta_{\text{H}}$  (400 MHz, CDCl<sub>3</sub>) 1.06 (6H, d, *J* 6.8 Hz, 2 × CH<sub>3</sub>), 1.97 (2H, m, CH<sub>2</sub>), 2.55-2.65 (5H, m, 2H from C(O)CH<sub>2</sub>, 2H from CCH<sub>2</sub> and 1H from CH), 2.85 (2H, q, *J* 7.3 Hz, CHCH<sub>2</sub>), 3.62 (2H, t, *J* 6.0 Hz, NCH<sub>2</sub>), 3.80 (3H, s, OCH<sub>3</sub>), 5.90 (1H, m, CH), 6.92 (2H, d, *J* 8.8 Hz, 2 × Ar-CH), 7.17 (2H, d, *J* 8.8 Hz, 2 × Ar-CH);  $\delta_{\text{C}}$  (100 MHz, CDCl<sub>3</sub>) 18.3 (2 × CH<sub>3</sub>), 23.9 (2 × CH<sub>2</sub>), 32.3 (CH<sub>2</sub>), 40.2 (CH<sub>2</sub>), 40.5 (CH), 51.9 (NCH<sub>2</sub>), 55.5 (OCH<sub>3</sub>), 114.5 (2 × Ar-CH), 127.9 (2 × Ar-CH), 129.4 (CH), 136.2 (C), 140.7 (Ar-CN), 158.1 (Ar-CO), 165.4 (C(O)), 214.6 (C(O)); *m/z* (CI mode) 316 (*M* + H, 100). *m/z* (EI mode) 316 (*M* + H, 2), 134 (20), 120 (50), 92 (40), 77 (100), 71 (40), 66 (90) and 53 (50). (Found: (*M*), 315.1836. C<sub>19</sub>H<sub>25</sub>O<sub>3</sub>N requires *M*, 315.1829).

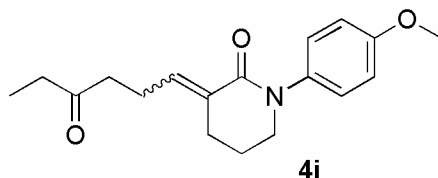

**E/Z 1-(4-Methoxy-phenyl)-3-(4-oxo-hexylidene)-piperidin-2-one 4i**

As for general procedure C, KHMDS (0.5 M in toluene, 9.00 ml, 4.50 mmol, 1.2 eq) was added to a solution of 18-crown-6 (4.95 g, 18.8 mmol, 5 eq) and [1-(4-methoxy-phenyl)-2-oxo-piperidin-3-yl]-phosphonic acid diethyl ester **6f** (1.28 g, 3.75 mmol, 1 eq) in THF (60 ml), followed by addition of 4-oxohexanal (855 mg, 7.50 mmol, 2 eq) in THF (60 ml) to give after work-up and purification gave *E/Z* 1-(4-Methoxy-phenyl)-3-(4-oxo-hexylidene)-piperidin-2-one **4i** (667 mg, 2.22 mmol, 59%, 1:3, *E:Z* ratio). Elution with 40% EtOAc in petroleum ether (40-60) gave (*E*)-1-(4-Methoxy-phenyl)-3-(4-oxo-hexylidene)-piperidin-2-one **4i** (152 mg, 0.51 mmol, 14%) as a yellow oil;  $\nu_{\max}$  (neat)/cm<sup>-1</sup> 2937, 1711 (C(O)), 1659 (C(O)), 1621, 1506, 1446, 1424, 1374, 1294, 1245, 1187, 1112, 1032, 828, 774 and 674;  $\delta_{\text{H}}$  (400 MHz, CDCl<sub>3</sub>) 0.98 (3H, t, *J* 7.3 Hz, CH<sub>3</sub>), 1.92 (2H, m, CH<sub>2</sub>CH<sub>2</sub>N), 2.37 (4H, m, 2H from C(O)CH<sub>2</sub>CH<sub>3</sub> and CH<sub>2</sub>CH), 2.54 (4H, m, 2H from C(O)CH<sub>2</sub> and 2H from CH<sub>2</sub>CH<sub>2</sub>CH<sub>2</sub>N), 3.58 (2H, m, NCH<sub>2</sub>), 3.72 (3H, s, OCH<sub>3</sub>), 6.72 (1H, m, CH), 6.82 (2H, d, *J* 9.1 Hz, 2 × Ar-CH), 7.09 (2H, d, *J* 9.1 Hz, 2 × Ar-CH);  $\delta_{\text{C}}$  (100 MHz, CDCl<sub>3</sub>) 7.80 (CH<sub>3</sub>), 22.2 (CH<sub>2</sub>), 23.1 (CH<sub>2</sub>), 24.6 (CH<sub>2</sub>), 36.0 (CH<sub>2</sub>), 40.8 (CH<sub>2</sub>), 51.5 (NCH<sub>2</sub>), 55.4 (OCH<sub>3</sub>), 114.3 (2 × Ar-CH), 127.2 (2 × Ar-CH), 129.9 (C), 136.7 (Ar-CN), 137.6 (CH), 157.9 (Ar-CO), 169.0 (C(O)), 209.6 (C(O)); *m/z* (ES+ mode) 360 (60), 324 (M + 23, 100), 302 (M + H, 70).

Further elution gave (*Z*)-1-(4-Methoxy-phenyl)-3-(4-oxo-hexylidene)-piperidin-2-one **4i** (515 mg, 1.71 mmol, 46%) as a yellow oil;  $\delta_{\text{H}}$  (400 MHz, CDCl<sub>3</sub>) 0.87 (3H, t, *J* 7.4 Hz, CH<sub>3</sub>), 1.84 (2H, m, CH<sub>2</sub>CH<sub>2</sub>N), 2.27 (2H, q, *J* 7.3 Hz, C(O)CH<sub>2</sub>CH<sub>3</sub>), 2.42 (4H, m, 2H from CH<sub>2</sub>CH and 2H from CH<sub>2</sub>CH<sub>2</sub>CH<sub>2</sub>N), 2.72 (2H, q, *J* 7.2 Hz, C(O)CH<sub>2</sub>), 3.47 (2H, m, NCH<sub>2</sub>), 3.65 (3H, s, OCH<sub>3</sub>), 5.75 (1H, m, CH), 6.77 (2H, m, 2 × Ar-CH), 7.02 (2H, m, 2 × Ar-CH);  $\delta_{\text{C}}$  (100 MHz, CDCl<sub>3</sub>) 7.76 (CH<sub>3</sub>), 23.9 (CH<sub>2</sub>), 24.1 (CH<sub>2</sub>), 32.2 (CH<sub>2</sub>), 35.5 (CH<sub>2</sub>), 42.2 (CH<sub>2</sub>), 51.8 (NCH<sub>2</sub>), 55.4 (OCH<sub>3</sub>), 114.4 (2 × Ar-CH), 127.6 (2 × Ar-CH), 129.5 (C), 136.2 (Ar-CN), 140.4 (CH), 158.0 (Ar-CO), 165.3 (C(O)), 211.4 (C(O));

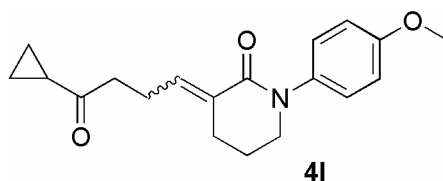



**(Z)-3-(4-Cyclopropyl-4-oxo-butylidene)-1-(4-methoxy-phenyl)-piperidin-2-one 4l**

As for general procedure C, KHMDS (0.5 M in toluene, 1.60 ml, 0.80 mmol, 1.2 eq) was added to a solution of 18-crown-6 (0.88 g, 3.33 mmol, 5 eq) and [1-(4-Methoxy-phenyl)-2-oxo-piperidin-3-yl]-phosphonic acid diethyl ester **6f** (228 mg, 0.67 mmol, 1 eq) in THF (20 ml), followed by addition of 4-cyclopropyl-4-oxo-butyraldehyde (0.13 ml, 1.00 mmol, 1.5 eq) in THF (10 ml) to give after work-up and purification (Z)-3-(4-cyclopropyl-4-oxo-butyldiene)-1-(4-methoxy-phenyl)-piperidin-2-one **4l** (135 mg, 0.43 mmol, 64%) as a yellow oil;  $\nu_{\max}$  (neat)/ $\text{cm}^{-1}$  3434, 2929, 2858, 2361, 1647 (C(O)), 1646 (C(O)), 1510, 1459, 1349, 1295, 1243, 1182, 1153, 1107, 1033 and 827;  $\delta_{\text{H}}$  (400 MHz,  $\text{CDCl}_3$ ) 0.82 (2H, m, *c*-Pr- $\text{CH}_2$ ), 0.98 (2H, m, *c*-Pr- $\text{CH}_2$ ), 1.96 (3H, m, 1H from *c*-Pr- $\text{CH}$ , 2H from  $\text{CH}_2\text{CH}_2\text{N}$ ), 2.56 (2H, t, *J* 5.3 Hz,  $\text{CH}_2\text{CH}_2\text{CH}_2\text{N}$ ), 2.73 (2H, t, *J* 7.2 Hz,  $\text{CH}_2\text{C(O)}$ ), 2.91 (2H, q, *J* 7.1 Hz,  $\text{CH}_2\text{CH}$ ), 3.62 (2H, m,  $\text{NCH}_2$ ), 3.80 (3H, s,  $\text{OCH}_3$ ), 5.91 (1H, t, *J* 7.6 Hz,  $\text{CHC}$ ), 6.92 (2H, m,  $2 \times \text{Ar-CH}$ ), 7.18 (2H, m,  $2 \times \text{Ar-CH}$ );  $\delta_{\text{C}}$  (100 MHz,  $\text{CDCl}_3$ ) 10.6 ( $2 \times \text{CH}_2$ ), 20.2 ( $\text{CHC(O)}$ ), 23.9 ( $\text{CH}_2$ ), 24.2 ( $\text{CH}_2$ ), 32.3 ( $\text{CH}_2$ ), 43.3 ( $\text{CH}_2$ ), 51.9 ( $\text{NCH}_2$ ), 55.5 ( $\text{OCH}_3$ ), 114.5 ( $2 \times \text{Ar-CH}$ ), 127.6 ( $2 \times \text{Ar-CH}$ ), 129.5 (C), 136.2 (Ar-CN), 140.6 ( $\text{CHC}$ ), 158.0 (Ar-CO), 165.4 (C(O)), 210.8 (C(O)); *m/z* (CI mode) 314 (*M* + H, 100). *m/z* (EI mode) 314 (*M* + H, 80), 244 (50), 218 (20), 205 (20), 135 (30), 123 (45), 110 (40), 84 (40), 69 (100) and 58 (40). (Found: (*M*), 313.1680  $\text{C}_{19}\text{H}_{23}\text{O}_3\text{N}$  requires *M*, 313.1672).

### General Procedure D: SmI<sub>2</sub>-mediated cyclization of 5 membered subsrates

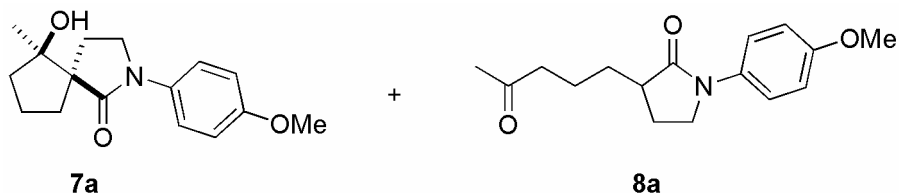

***rac*-(5*R*, 6*R*)-6-Hydroxy-2-(4-methoxy-phenyl)-6-methyl-2-aza-spiro[4.4]nonan-1-one 7a and 1-(4-methoxy-phenyl)-3-(4-oxo-pentyl)-pyrrolidin-2-one 8a**

To a stirred solution of  $\text{SmI}_2$  (0.1 M in THF, 7.30 ml, 0.73 mmol, 4 eq) at 0 °C, was added MeOH (0.74 ml, 18.3 mmol, 100 eq) at the reaction left to stir for 30 min. A solution of *E/Z* 1-(4-methoxy-phenyl)-3-(4-oxo-pentylidene)-pyrrolidin-2-one **4a** (50 mg, 0.18 mmol, 1 eq) in THF (2 ml) was added *via cannula* and the reaction left to stir for 18 hours. The reaction was quenched by opening to the air and the addition of aqueous saturated NaCl (25 ml). The aqueous layer was then separated and extracted with EtOAc (3 × 30 ml) and the combined organics dried ( $\text{Na}_2\text{SO}_4$ ) and concentrated *in vacuo* to give the crude product. Purification by flash column chromatography on silica gel eluting with 50% EtOAc in petroleum ether (40-60) gave *rac*-6-hydroxy-2-(4-methoxy-phenyl)-6-methyl-2-aza-spiro[4.4]nonan-1-one **7a** (11.2 mg, 0.04 mmol, 18%) as a yellow oil;  $\nu_{\text{max}}$  (neat)/ $\text{cm}^{-1}$  3397 (OH), 2960, 1659 (C=O), 1510, 1443, 1392, 1297, 1249, 1180, 1038, 934, 830 and 665;  $\delta_{\text{H}}$  (500 MHz,  $\text{CDCl}_3$ ) 1.25 (3H, s,  $\text{CH}_3$ ), 1.63 (3H, m, 1H from  $\text{CH}_2\text{COH}$  and 2H from  $\text{CH}_2\text{C}$ ), 1.79 (1H, ddd,  $J$  12.6, 7.4, 3.2 Hz,  $\text{CH}_2\text{CH}_2\text{N}$ ), 1.91 (2H, m,  $\text{CH}_2\text{CH}_2\text{C}$ ), 2.09 (1H, ddd,  $J$  12.7, 8.5, 8.3 Hz,  $\text{CH}_2\text{CH}_2\text{N}$ ), 2.30 (1H, m, 1H from  $\text{CH}_2\text{COH}$ ), 3.66 (2H, m,  $\text{NCH}_2$ ), 3.74 (3H, s,  $\text{OCH}_3$ ), 4.92 (1H, s, OH), 6.84 (2H, m, 2 × Ar-CH), 7.43 (2H, m, 2 × Ar-CH);  $\delta_{\text{C}}$  (100 MHz,  $\text{CDCl}_3$ ) 20.4 ( $\text{CH}_2$ ), 22.7 ( $\text{CH}_3$ ), 28.9 ( $\text{CH}_2$ ), 33.9 ( $\text{CH}_2$ ), 38.7 ( $\text{CH}_2$ ), 45.9 ( $\text{NCH}_2$ ), 55.5 ( $\text{OCH}_3$ ), 56.8 (C), 82.6 (COH), 114.1 (2 × Ar-CH), 121.9 (2 × Ar-CH), 132.1 (Ar-CN), 156.9 (Ar-CO), 177.7 (C(O));  $m/z$  (CI mode) 276 ( $M + \text{H}$ , 100).  $m/z$  (EI mode) 276 ( $M + \text{H}$ , 40), 258 (30), 218 (10), 204 (100), 136 (70), 120 (30), 108 (30), 83 (30) and 58 (20). (Found: ( $M$ ), 275.1519.  $\text{C}_{16}\text{H}_{21}\text{O}_3\text{N}$  requires  $M$ , 275.1516).

Further elution with 50% EtOAc in petroleum ether (40-60) gave 1-(4-methoxy-phenyl)-3-(4-oxo-pentyl)-pyrrolidin-2-one **8a** (11.9 mg, 0.04 mmol, 20%);  $\nu_{\text{max}}$  (neat)/ $\text{cm}^{-1}$  3287, 2957, 2360, 1731, 1617 (C(O)), 1599 (C(O)), 1492, 1483, 1461, 1375, 1352, 1327, 1298, 1242, 1199, 1164, 1141, 1107, 1034, 982, 934, 906, 834, 754 and 659;  $\delta_{\text{H}}$  (400 MHz,  $\text{CDCl}_3$ ) 1.40 (1H, m, 1H from  $\text{CH}_2\text{CH}_2\text{N}$ ), 1.61 (2H, m,  $\text{CHCH}_2$ ), 1.82 (2H, m,  $\text{C(O)CH}_2\text{CH}_2$ ), 2.09 (3H, s,  $\text{CH}_3$ ), 2.27 (1H, m, 1H from  $\text{CH}_2\text{CH}_2\text{N}$ ), 2.48 (3H, m, 1H from  $\text{CHC(O)}$  and  $\text{CH}_2\text{C(O)}$ ), 3.68 (2H, m,  $\text{NCH}_2$ ), 3.73 (3H, s,  $\text{OCH}_3$ ), 6.83 (2H, d,  $J$  9.1 Hz, 2 × Ar-CH), 7.43 (2H, d,  $J$  9.3 Hz, 2 × Ar-CH);  $\delta_{\text{C}}$  (100 MHz,  $\text{CDCl}_3$ ) 21.3 ( $\text{CH}_2$ ), 24.7 ( $\text{CH}_2$ ), 30.0 ( $\text{CH}_3$ ), 30.7 ( $\text{CH}_2$ ), 43.1 ( $\text{CH}_2$ ), 43.5 (CH), 47.2 ( $\text{NCH}_2$ ), 55.5 ( $\text{OCH}_3$ ), 114.0 (2 × Ar-CH), 121.6 (2 × Ar-CH), 132.8 (Ar-CN), 156.5 (Ar-CO), 175.3

(C(O)), 208.7 (C(O));  $m/z$  (CI mode) 276 ( $M + H$ , 100).  $m/z$  (EI mode) 276 ( $M + H$ , 70), 204 (30), 191 (100), 136 (25), 120 (20), 83 (60) and 49 (30). (Found: ( $M$ ), 275.1525  $C_{16}H_{22}O_3N$  requires  $M$ , 275.1516).

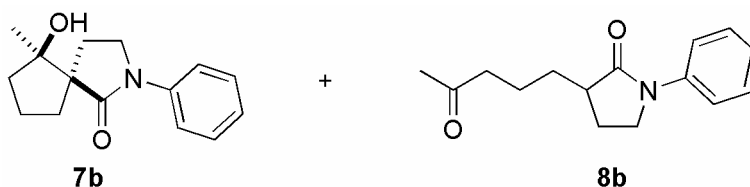

***rac*-(5*R*, 6*R*)-6-Hydroxy-6-methyl-2-phenyl-2-aza-spiro[4.4]nonan-1-one **7b** and 3-(4-oxo-pentyl)-1-phenyl-pyrrolidin-2-one **8b****

As for general procedure D, reaction of *E/Z* 3-(4-oxo-pentylidene)-1-phenyl-pyrrolidin-2-one **4b** (50 mg, 0.21 mmol, 1 eq) with  $SmI_2$  (0.1 M in THF, 8.20 ml, 0.82 mmol, 4 eq) and MeOH (0.83 ml, 20.6 mmol, 100 eq), followed by purification by flash column chromatography on silica gel eluting with 40% EtOAc in petroleum ether (40-60) gave *rac*-(5*R*, 6*R*)-6-hydroxy-6-methyl-2-phenyl-2-aza-spiro[4.4]nonan-1-one **7b** (13.5 mg, 0.06 mmol, 24%) as a yellow oil;  $\nu_{max}$  (neat)/ $cm^{-1}$  3411 (OH), 2965, 2873, 1666 (C(O)), 1597, 1495, 1461, 1389, 1307, 1231, 1148, 1101, 934, 863, 760 and 691;  $\delta_H$  (400 MHz,  $CDCl_3$ ) 1.26 (3H, s,  $CH_3$ ), 1.56 (1H, m, 1H from  $CH_2COH$ ), 1.69 (2H, m, 1H from  $CH_2C$  and 1H from  $CH_2CH_2C$ ), 1.80 (1H, m, 1H from  $CH_2CH_2N$ ), 1.91 (2H, m, 1H from  $CH_2COH$  and 1H from  $CH_2CH_2C$ ), 2.10 (1H, m,  $CH_2CH_2N$ ), 2.30 (1H, m,  $CH_2C$ ), 3.72 (2H, m,  $NCH_2$ ), 4.56 (1H, s, OH), 7.10 (1H, m, Ar-CH), 7.32 (2H, m,  $2 \times$  Ar-CH), 7.56 (2H, m,  $2 \times$  Ar-CH);  $\delta_C$  (100 MHz,  $CDCl_3$ ) 20.4 ( $CH_2$ ), 22.7 ( $CH_3$ ), 28.8 ( $CH_2$ ), 33.9 ( $CH_2$ ), 38.7 ( $CH_2$ ), 45.5 ( $NCH_2$ ), 56.9 (COH), 82.6 (C), 120.2 ( $2 \times$  Ar-CH), 125.1 (Ar-CH), 128.9 ( $2 \times$  Ar-CH), 138.9 (Ar-C), 178.2 (C(O));  $m/z$  (CI mode) 246 ( $M + H$ , 100).  $m/z$  (EI mode) 246 ( $M + H$ , 20), 174 (30), 160 (100), 106 (70), 77 (40), 55 (20) and 42 (40). (Found: ( $M$ ), 245.1409.  $C_{15}H_{19}O_2N$  requires  $M$ , 245.1410).

Further elution with 40% EtOAc in petroleum ether (40-60) gave 3-(4-oxo-pentyl)-1-phenyl-pyrrolidin-2-one **8b** (14.8 mg, 0.06 mmol, 27%);  $\nu_{max}$  (neat)/ $cm^{-1}$  3362, 3066, 2977, 2939, 2888, 2864, 1714 (C(O)), 1686 (C(O)), 1598, 1495, 1458, 1398, 1351, 1315,

1285, 1223, 1182, 1159, 1116, 1034, 888, 764, 698, 590 and 455;  $\delta_{\text{H}}$  (500 MHz,  $\text{CDCl}_3$ ) 1.48 (1H, m, 1H from  $\text{C(O)CH}_2\text{CH}_2\text{CH}_2$ ), 1.70 (2H, m,  $\text{C(O)CH}_2\text{CH}_2$ ), 1.84 (1H m, 1H from  $\text{CH}_2\text{CH}_2\text{N}$ ), 1.93 (1H, m, 1H from  $\text{C(O)CH}_2\text{CH}_2\text{CH}_2$ ), 2.16 (3H, s,  $\text{CH}_3$ ), 2.35 (1H, m, 1H from  $\text{CH}_2\text{CH}_2\text{N}$ ), 2.51 (2H, m,  $\text{C(O)CH}_2$ ), 2.60 (1H, m,  $\text{CH}$ ), 3.79 (2H, m,  $\text{NCH}_2$ ), 7.14 (1H, t,  $J$  7.4 Hz, Ar-CH), 7.37 (2H, t,  $J$  8.0 Hz,  $2 \times$  Ar-CH), 7.66 (2H, d,  $J$  7.9 Hz,  $2 \times$  Ar-CH);  $\delta_{\text{C}}$  (125 MHz,  $\text{CDCl}_3$ ) 21.3 ( $\text{CH}_2$ ), 24.6 ( $\text{CH}_2$ ), 30.0 ( $\text{CH}_3$ ), 30.6 ( $\text{CH}_2$ ), 43.3 ( $\text{CH}$ ), 43.4 ( $\text{CH}_2$ ), 46.7 ( $\text{NCH}_2$ ), 119.8 ( $2 \times$  Ar-CH), 124.4 (Ar-CH), 128.8 ( $2 \times$  Ar-CH), 139.5 (Ar-C), 175.6 ( $\text{C(O)}$ ), 208.6 ( $\text{C(O)}$ );  $m/z$  (CI mode) 246 ( $M + \text{H}$ , 100).  $m/z$  (EI mode) 246 ( $M + \text{H}$ , 20), 174 (30), 161 (100), 105 (20), 76 (10) and 54 (10). (Found: ( $M$ ), 245.1407.  $\text{C}_{15}\text{H}_{19}\text{O}_2\text{N}$  requires  $M$ , 245.1410).

***rac*-(5*R*, 6*R*)-2-(4-Fluoro-phenyl)-6-hydroxy-6-methyl-2-aza-spiro[4.4]nonan-1-one**  
**7c and 1-(4-fluoro-phenyl)-3-(4-oxo-pentyl)-pyrrolidin-2-one 8c**

C), 159.5 (Ar-CF, d,  $J_{\text{CF}}$  250 Hz), 178.1 (C(O));  $m/z$  (ES+ mode) 549 (60), 527 (50), 322 (50), 264 ( $M + H$ , 100).

Further elution with 40% EtOAc in petroleum ether (40-60) gave 1-(4-fluoro-phenyl)-3-(4-oxo-pentyl)-pyrrolidin-2-one **8c** (19.0 mg, 0.02 mmol, 58%) as a yellow oil;  $\nu_{\text{max}}$  (neat)/ $\text{cm}^{-1}$  2933, 1695 (C(O)), 1693 (C(O)), 1599, 1506, 1455, 1425, 1393, 1361, 1322, 1227, 1160, 1115, 1093, 890 and 834;  $\delta_{\text{H}}$  (500 MHz,  $\text{CDCl}_3$ ) 1.40 (1H, m, 1H from  $\text{CH}_2\text{CH}$ ), 1.61 (2H, m,  $\text{C(O)CH}_2$ ), 1.81 (2H, m, 1H from  $\text{CH}_2\text{CH}_2\text{N}$  and 1H from  $\text{CH}_2\text{CH}$ ), 20.9 (3H, s,  $\text{CH}_3$ ), 2.28 (1H, m, 1H from  $\text{CH}_2\text{CH}_2\text{N}$ ), 2.44 (2H, td,  $J$  7.3, 2.1 Hz,  $\text{C(O)CH}_2\text{CH}_2$ ), 2.52 (1H, m,  $\text{CH}$ ), 3.68 (2H, dt,  $J$  8.6, 1.7 Hz,  $\text{NCH}_2$ ), 6.99 (2H, d,  $J$  8.3 Hz,  $2 \times \text{Ar-CH}$ ), 7.50 (2H, dd,  $J$  9.0, 4.8 Hz,  $2 \times \text{Ar-CH}$ );  $\delta_{\text{C}}$  (125 MHz,  $\text{CDCl}_3$ ) 21.1 ( $\text{CH}_2$ ), 24.6 ( $\text{CH}_2$ ), 30.1 ( $\text{CH}_3$ ), 30.6 ( $\text{CH}_2$ ), 43.1 ( $\text{CH}$ ), 43.5 ( $\text{CH}_2$ ), 47.0 ( $\text{NCH}_2$ ), 115.5 ( $2 \times \text{Ar-CH}$ ), 121.5 ( $2 \times \text{Ar-CH}$ ), 135.6 (Ar-CN), 159.2 (Ar-CF, d,  $J$  242 Hz), 175.5 (C(O)), 208.7 (C(O));  $m/z$  (ES+ mode) 549 (30), 322 (20), 286 (50), 264 ( $M + H$ , 100).

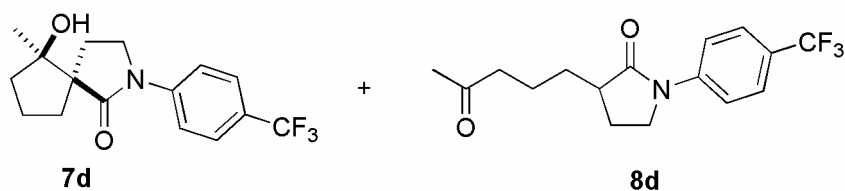

*rac*-(5*R*, 6*R*)-6-Hydroxy-6-methyl-2-(4-trifluoromethyl-phenyl)-2-aza-spiro[4.4]nonan-1-one **7d** and 3-(4-oxo-pentyl)-1-(4-trifluoromethyl-phenyl)-pyrrolidin-2-one **8d**

As for general procedure D, reaction of *E/Z*-3-(4-oxo-pentylidene)-1-(4-trifluoromethyl-phenyl)-pyrrolidin-2-one **4d** (31 mg, 0.10 mmol, 1 eq) with  $\text{SmI}_2$  (0.1 M in THF, 4.00 ml, 0.40 mmol, 4 eq) and MeOH (0.40 ml, 9.90 mmol, 100 eq), followed by purification by flash column chromatography on silica gel eluting with 40% EtOAc in petroleum ether (40-60) gave *rac*-(5*R*, 6*R*)-6-hydroxy-6-methyl-2-(4-trifluoromethyl-phenyl)-2-aza-spiro[4.4]nonan-1-one **7d** (16 mg, 0.05 mmol, 54%) as a yellow oil;  $\nu_{\text{max}}$  (neat)/ $\text{cm}^{-1}$  3409 (OH), 2960, 1678 (C=O), 1614, 1521, 1429, 1393, 1305, 1230, 1194, 1165, 1121, 1069, 1014, 957, 841 and 666.  $\delta_{\text{H}}$  (500 MHz,  $\text{CDCl}_3$ ) 1.26 (3H, s,  $\text{CH}_3$ ), 1.58 (1H, m, 1H

from  $\text{CH}_2\text{C}$ ), 1.69 (2H, m,  $\text{CH}_2\text{CH}_2\text{C}$ ), 1.85 (1H, m, 1H from  $\text{CH}_2\text{CH}_2\text{N}$ ), 1.94 (2H, m, 1H from  $\text{CH}_2\text{COH}$ ) and 1H from  $\text{CH}_2\text{C}$ ), 2.13 (1H, m, 1H from  $\text{CH}_2\text{CH}_2\text{N}$ ), 2.29 (1H, m,  $\text{CH}_2\text{COH}$ ), 3.73 (2H, m,  $\text{NCH}_2$ ), 4.54 (1H, s, OH), 7.57 (2H, d,  $J$  8.6 Hz,  $2 \times \text{Ar-CH}$ ), 7.72 (2H, d,  $J$  8.6 Hz,  $2 \times \text{Ar-CH}$ );  $\delta_{\text{C}}$  (125 MHz,  $\text{CDCl}_3$ ) 20.3 ( $\text{CH}_2$ ), 22.8 ( $\text{CH}_3$ ), 28.6 ( $\text{CH}_2$ ), 33.9 ( $\text{CH}_2$ ), 38.7 ( $\text{CH}_2$ ), 45.3 ( $\text{NCH}_2$ ), 57.2 (C), 82.6 (COH), 117.3 ( $\text{CCF}_3$ ), 119.5 ( $2 \times \text{Ar-CH}$ ), 124.0 ( $\text{CF}_3$ , q,  $J$  271 Hz), 126.0 ( $2 \times \text{Ar-CH}$ ), 141.9 (Ar-CN), 178.7 (C(O));  $m/z$  (CI mode) 314 ( $M + \text{H}$ , 100) and 242 (10).  $m/z$  (EI mode) 314 ( $M + \text{H}$ , 10), 296 (15), 242 (100), 174 (15), 145 (15), 70 (20), 55 (50) and 43 (80). (Found: ( $M + \text{H}$ ), 314.1358.  $\text{C}_{16}\text{H}_{19}\text{O}_2\text{NF}_3$  requires  $M + \text{H}$ , 314.1362)

further elution gave 3-(4-oxo-pentyl)-1-(4-trifluoromethyl-phenyl)-pyrrolidin-2-one **8d** (6 mg, 0.02 mmol, 29%) as a yellow oil;  $\nu_{\text{max}}$  (neat)/ $\text{cm}^{-1}$  3368, 2946, 2833, 2523, 2043, 1654 (C(O)), 1648 (C(O)), 1449, 1420, 1115, 1027, 759, 665 and 452;  $\delta_{\text{H}}$  (500 MHz,  $\text{CDCl}_3$ ) 1.42 (1H, m, 1H from  $\text{CH}_2\text{CH}$ ), 1.64 (2H, m, 1H from  $\text{CH}_2\text{CH}$  and 1H from  $\text{CH}_2\text{CH}_2\text{CH}$ ), 1.84 (2H, m, 1H from  $\text{CH}_2\text{CH}_2\text{CH}$  and 1H from  $\text{CH}_2\text{CH}_2\text{N}$ ), 2.09 (3H, s,  $\text{CH}_3$ ), 2.32 (1H, m,  $\text{CH}_2\text{CH}_2\text{N}$ ), 2.45 (2H, m, 1H from  $\text{CH}_2\text{C(O)}$  and 1H from CH), 2.56 (1H, m,  $\text{CH}_2\text{C(O)}$ ), 3.74 (2H, dd,  $J$  8.7, 5.2 Hz,  $\text{NCH}_2$ ), 7.54 (2H, d,  $J$  8.6 Hz,  $2 \times \text{Ar-CH}$ ), 7.71 (2H, d,  $J$  8.5 Hz,  $2 \times \text{Ar-CH}$ );  $\delta_{\text{C}}$  (125 MHz,  $\text{CDCl}_3$ ) 21.2 ( $\text{CH}_2$ ), 24.5 ( $\text{CH}_2$ ), 24.6 ( $\text{CH}_2$ ), 30.1 ( $\text{CH}_3$ ), 30.5 ( $\text{CH}_2$ ), 43.4 (CH), 45.5 ( $\text{NCH}_2$ ), 119.1 ( $2 \times \text{Ar-CH}$ ), 125.9 ( $2 \times \text{Ar-CH}$ ), 142.0 (Ar-CN), 176.3 (C(O)), 208.5 (C(O)),  $\text{CCF}_3$  and  $\text{CF}_3$  (not visible);  $m/z$  (CI mode) 314 ( $M + \text{H}$ , 100), 96 (20) and 79 (10).  $m/z$  (EI mode) 314 ( $M$ , 5), 256 (15), 242 (30), 229 (40), 145 (20), 83 (100), 69 (20) and 49 (40). (Found: ( $M$ ), 313.1274.  $\text{C}_{16}\text{H}_{18}\text{O}_2\text{NF}_3$  requires  $M$ , 313.1284);

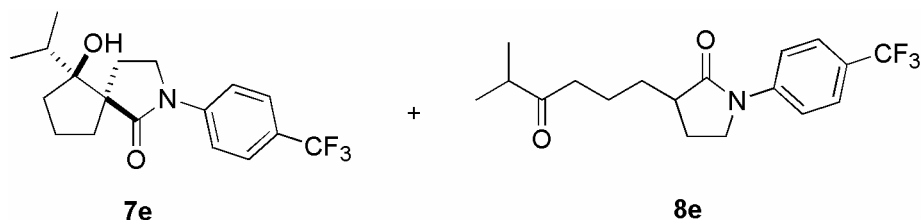

*rac*-(5*R*, 6*S*)-6-Hydroxy-6-isopropyl-2-(4-trifluoromethyl-phenyl)-2-aza-spiro[4.4]nonan-1-one **7e** and 3-(5-methyl-4-oxo-hexyl)-1-(4-trifluoromethyl-phenyl)-pyrrolidin-2-one **8e**

As for general procedure D, reaction of *E/Z* 3-(5-methyl-4-oxo-hexylidene)-1-(4-trifluoromethyl-phenyl)-pyrrolidin-2-one **4e** (50 mg, 0.15 mmol, 1 eq) with SmI<sub>2</sub> (0.1 M in THF, 5.90 ml, 0.59 mmol, 4 eq) and MeOH (0.60 ml, 14.75 mmol, 100 eq), followed by purification by flash column chromatography on silica gel eluting with 20% EtOAc in petroleum ether (40-60) gave *rac*-(5*R*, 6*S*)-6-hydroxy-6-isopropyl-2-(4-trifluoromethyl-phenyl)-2-aza-spiro[4.4]nonan-1-one **7e** (19.6 mg, 0.06 mmol, 31%) as a yellow oil;  $\nu_{\max}$  (neat)/cm<sup>-1</sup> 3401 (OH), 2967, 1674 (C=O), 1614, 1521, 1429, 1388, 1323, 1229, 1166, 1121, 1067, 1013, 841, 758, 665, 594 and 447;  $\delta_{\text{H}}$  (400 MHz, CDCl<sub>3</sub>) 0.79 (3H, d, *J* 6.8 Hz, *o*-Pr-CH<sub>3</sub>), 0.95 (3H, d, *J* 6.6 Hz, *o*-Pr-CH<sub>3</sub>), 1.54 (2H, m, CCH<sub>2</sub>CH<sub>2</sub>), 1.82 (3H, m, *o*-Pr-CH, 1H from CH<sub>2</sub>CH<sub>2</sub>N, 1H from CH<sub>2</sub>COH), 2.01 (2H, m, CCH<sub>2</sub>), 2.19 (1H, m, 1H from CH<sub>2</sub>CH<sub>2</sub>N), 2.34 (1H, m, 1H from CH<sub>2</sub>COH), 3.82 (2H, m, NCH<sub>2</sub>), 5.25 (1H, s, OH), 7.56 (2H, d, *J* 8.6 Hz, 2 × Ar-CH), 7.65 (2H, m, 2 × Ar-CH);  $\delta_{\text{C}}$  (100 MHz, CDCl<sub>3</sub>) 17.1 (CH<sub>3</sub>), 18.1 (CH<sub>3</sub>), 20.1 (CH<sub>2</sub>), 26.7 (CH<sub>2</sub>), 33.3 (CH), 34.8 (CH<sub>2</sub>), 37.9 (CH<sub>2</sub>), 45.0 (NCH<sub>2</sub>), 55.4 (COH), 87.2 (C), 119.6 (2 × Ar-CH) 121.2 (CCF<sub>3</sub>, q, *J* 338 Hz), 126.1 (2 × Ar-CH), 126.5 (Ar-CCF<sub>3</sub>, q, *J* 32 Hz), 141.8 (Ar-C), 180.2 (C(O)); *m/z* (EI mode) 341 (*M*, 20), 297 (10), 256 (15), 242 (15), 174 (100), 144 (15), 68 (25) and 54 (20). (Found: (*M*), 341.1590. C<sub>18</sub>H<sub>22</sub>O<sub>2</sub>NF<sub>3</sub> requires *M*, 341.1597).

Further elution with 20% EtOAc in petroleum ether (40-60) gave 3-(5-methyl-4-oxo-hexyl)-1-(4-trifluoromethyl-phenyl)-pyrrolidin-2-one **8e** (35 mg, 0.10 mmol, 69%) as a yellow oil;  $\nu_{\max}$  (neat)/cm<sup>-1</sup> 3385, 2945, 1696 (C(O)), 1616 (C(O)), 1520, 1387, 1327, 1167, 1118, 1073, 1015, 892, 839 and 711;  $\delta_{\text{H}}$  (300 MHz, CDCl<sub>3</sub>) 1.02 (3H, d, *J* 0.9 Hz, CH<sub>3</sub>), 1.04 (3H, d, *J* 1.1 Hz, CH<sub>3</sub>), 1.40 (1H, m, CH(CH<sub>3</sub>)<sub>2</sub>), 1.62 (2H, m, C(O)CH<sub>2</sub>CH<sub>2</sub>), 1.83 (2H, m, CH<sub>2</sub>CH<sub>2</sub>N), 2.33 (1H, m, CHC(O)), 2.53 (4H, m, CH<sub>2</sub>CH(O) and C(O)CH<sub>2</sub>), 3.74 (2H, dd, *J* 8.7, 5.3 Hz, NCH<sub>2</sub>), 7.54 (2H, d, *J* 8.7 Hz, 2 × Ar-CH), 7.71 (2H, d, *J* 8.7 Hz, 2 × Ar-CH);  $\delta_{\text{C}}$  (75 MHz, CDCl<sub>3</sub>) 17.3 (2 × CH<sub>3</sub>), 20.1 (CH<sub>2</sub>), 23.5 (CH<sub>2</sub>), 29.7 (CH<sub>2</sub>), 39.0 (CH<sub>2</sub>), 39.9 (CH), 42.5 (CH), 45.5 (CH<sub>2</sub>), 118.0 (2 × Ar-CH), 119.6 (CF<sub>3</sub>, q, *J* 246 Hz), 124.9 (Ar-CCF<sub>3</sub>, q, *J* 32 Hz), 124.9 (2 × Ar-CH), 141.4 (Ar-CN), 175.2 (C(O)), 213.4 (C(O)); *m/z* (CI mode) 342 (*M* + H, 100). *m/z* (EI mode) 341

( $M + H$ , 15), 298 (15), 270 (20), 255 (20), 241 (40), 228 (75), 83 (100), 68 (30), 54 (70) and 48 (80). (Found: ( $M$ ), 341.1604.  $C_{18}H_{22}O_2NF_3$  requires  $M$ , 341.1597).

#### General Procedure E: $SmI_2$ -mediated cyclization of 6-membered substrates

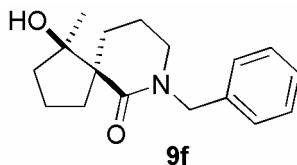

#### *rac*-(1*R*, 5*R*)-7-Benzyl-1-hydroxy-1-methyl-7-aza-spiro[4.5]decan-6-one **9f**

To a stirred solution of  $SmI_2$  (0.1 M in THF, 13.6 ml, 1.36 mmol, 4 eq) at 0 °C, was added MeOH (0.34 ml, 10.2 mmol, 30 eq) at the reaction left to stir for 30 min. A solution of *E/Z* 1-Benzyl-3-(4-oxo-pentylidene)-piperidin-2-one **4f** (93 mg, 0.34 mmol, 1 eq) in THF (1.8 ml) was added *via cannula* and the reaction left to stir for 5 hours. The reaction was quenched by opening to the air and the addition of aqueous saturated NaCl (25 ml). The aqueous layer was then separated and extracted with EtOAc (3 × 30 ml) and the combined organics dried ( $Na_2SO_4$ ) and concentrated *in vacuo* to give the crude product. Purification by flash column chromatography on silica gel eluting with 40% EtOAc in petroleum ether (40-60) gave *rac*-(1*R*, 5*R*)-7-Benzyl-1-hydroxy-1-methyl-7-aza-spiro[4.5]decan-6-one **9f** (16 mg, 0.06 mmol, 18%) as a yellow oil;  $\nu_{max}$  (neat)/ $cm^{-1}$  3450 (OH), 2924, 2853, 2339, 2097, 1641 (C(O)), 1511, 1460, 1397, 1285, 1245, 1179, 1119, 1028 and 850;  $\delta_H$  (400 MHz,  $CDCl_3$ ) 0.79 (2H, m, 2 × 1H from  $CH_2$ ), 1.19 (3H, s,  $CH_3$ ), 1.58- 1.92 (7H, m, 7 × 1H from  $CH_2$ ), 2.35 (1H, m, 1H from  $CH_2$ ), 3.17 (2H, m,  $NCH_2$ ), 4.53 (2H, dd,  $J$  70.1, 14.6 Hz,  $NCH_2Ph$ ), 6.67 (1H, s, OH), 7.22 (5H, m, 5 × Ar-CH);  $\delta_C$  (100 MHz,  $CDCl_3$ ) 19.6 ( $CH_2$ ), 20.2 ( $CH_2$ ), 23.0 ( $CH_3$ ), 28.9 ( $CH_2$ ), 35.3 ( $CH_2$ ), 38.4 ( $CH_2$ ), 47.7 ( $NCH_2$ ), 50.7 ( $NCH_2Ph$ ), 53.6 (C), 83.9 (COH), 127.4 (Ar-CH), 127.8 (2 × Ar-CH), 128.7 (2 × Ar-CH), 136.9 (Ar-C), 176.1 (C(O));  $m/z$  (CI mode) 274 ( $M + H$ , 60), 256 (40), 202 (35), 90 (50) and 82 (100).  $m/z$  (EI mode) 273 ( $M$ , 10), 255 (40), 227 (30), 202 (80), 189 (10), 91 (100) and 65 (10).



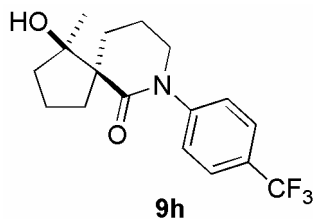

***rac*-(1*R*, 5*R*)-1-Hydroxy-1-methyl-7-(4-trifluoromethyl-phenyl)-7-aza-spiro[4.5]decan-6-one **9h****

As for general procedure E, treatment of *E/Z*-3-(4-oxo-pentylidene)-1-(4-trifluoromethyl-phenyl)-piperidin-2-one **4h** (200 mg, 0.62 mmol, 1 eq) with SmI<sub>2</sub> (0.1 M in THF, 24.6 ml, 2.46 mmol, 4 eq) and MeOH (0.75 ml, 18.6 mmol, 30 eq), followed by purification by flash column chromatography on silica gel eluting with 40% EtOAc in petroleum ether (40-60) gave *rac*-(1*R*, 5*R*)-1-hydroxy-1-methyl-7-(4-trifluoromethyl-phenyl)-7-aza-spiro[4.5]decan-6-one **9h** (201 mg, 0.54 mmol, 87%);  $\nu_{\text{max}}$  (neat)/cm<sup>-1</sup> 3325 (OH), 2961, 1624 (C(O)), 1603, 1484, 1408, 1304, 1165, 1124, 1067, 933, 907, 846, 756 and 664;  $\delta_{\text{H}}$  (500 MHz, CDCl<sub>3</sub>) 1.36 (3H, s, CH<sub>3</sub>), 1.70-1.77 (3H, m, 3 × 1H from CH<sub>2</sub>), 1.89-1.93 (3H, m, 3 × 1H from CH<sub>2</sub>), 2.00-2.11 (3H, m, 2 H from CH<sub>2</sub>CH<sub>2</sub>N and 1H from CH<sub>2</sub>), 2.45 (1H, m, 1H from CH<sub>2</sub>), 3.63 (1H, m, 1H from NCH<sub>2</sub>), 3.75 (1H, m, 1H from NCH<sub>2</sub>), 6.02 (1H, s, OH), 7.34 (2H, d, *J* 8.5 Hz, 2 × Ar-CH), 7.69 (2H, d, *J* 8.2 Hz, 2 × Ar-CH);  $\delta_{\text{C}}$  (100 MHz, CDCl<sub>3</sub>) 20.2 (CH<sub>2</sub>), 20.3 (CH<sub>2</sub>), 23.1 (CH<sub>3</sub>), 29.1 (CH<sub>2</sub>), 35.6 (CH<sub>2</sub>), 38.7 (CH<sub>2</sub>), 51.7 (NCH<sub>2</sub>), 54.2 (C), 84.0 (COH), 123.8 (CF<sub>3</sub>, q, *J* 272 Hz), 126.3 (2 × Ar-CH), 126.4 (2 × Ar-CH), 129.5 (Ar-CCF<sub>3</sub>, q, *J* 32 Hz), 146.3 (Ar-C) and 176.9 (C(O)); *m/z* (CI mode) 328 (*M* + H, 100), 310 (15) and 256 (5). *m/z* (EI mode) 327 (*M*, 3), 256 (30), 186 (15), 174 (100), 145 (60), 69 (20) and 43 (40). (Found: (*M*), 327.1442. C<sub>17</sub>H<sub>20</sub>O<sub>2</sub>NF<sub>3</sub> requires *M*, 327.1441).

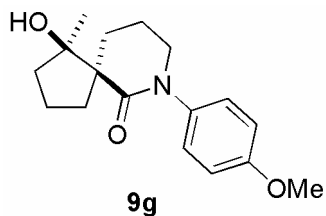

***rac*-(1*R*, 5*R*)-1-Hydroxy-7-(4-methoxy-phenyl)-1-methyl-7-aza-spiro[4.5]decan-6-one**  
**9g**

As for general procedure E, treatment of *E/Z*-1-(4-methoxy-phenyl)-3-(4-oxopentylidene)-piperidin-2-one **4g** (200 mg, 0.70 mmol, 1 eq) with SmI<sub>2</sub> (0.1 M in THF, 28.0 ml, 2.80 mmol, 4 eq) and MeOH (0.85 ml, 21.0 mmol, 30 eq), followed by purification by flash column chromatography on silica gel eluting with 60% EtOAc in petroleum ether (40-60) *rac*-(1*R*, 5*R*)-1-hydroxy-7-(4-methoxy-phenyl)-1-methyl-7-aza-spiro[4.5]decan-6-one **9g** (159 mg, 0.55 mmol, 79%) as a yellow oil;  $\nu_{\max}$  (neat)/cm<sup>-1</sup> 3293 (OH), 2957, 1617 (C(O)), 1599, 1480, 1463, 1411, 1351, 1327, 1298, 1243, 1164, 1141, 1035, 934, 906, 833, 754 and 665;  $\delta_{\text{H}}$  (125 MHz, CDCl<sub>3</sub>) 1.34 (3H, s, CH<sub>3</sub>), 1.69 (3H, m, 1H from CH<sub>2</sub> and 2H from CH<sub>2</sub>), 1.96 (6H, m, 3 × CH<sub>2</sub>), 2.43 (1H, m, 1H from CH<sub>2</sub>CH<sub>2</sub>N), 3.56 (1H, m 1H from NCH<sub>2</sub>), 3.65 (1H, m, NCH<sub>2</sub>), 3.80 (3H, s, OCH<sub>3</sub>), 6.92 (2H, m, 2 × Ar-CH), 7.12 (2H, m, 2 × Ar-CH);  $\delta_{\text{C}}$  (125 MHz, CDCl<sub>3</sub>) 20.2 (2 × CH<sub>2</sub>), 22.9 (CH<sub>3</sub>), 29.1 (CH<sub>2</sub>), 35.4 (CH<sub>2</sub>), 38.5 (CH<sub>2</sub>), 52.3 (C), 53.4 (NCH<sub>2</sub>), 55.5 (OCH<sub>3</sub>), 84.0 (COH), 114.6 (2 × Ar-CH), 127.5 (2 × Ar-CH), 135.9 (Ar-C), 158.5 (Ar-C) and 176.8 (C(O));  $m/z$  (CI mode) 290 (*M* + H, 100), 272 (10), 218 (5) and 136 (4).  $m/z$  (EI mode) 289 (*M*, 10), 218 (100), 205 (10), 149 (30), 136 (70), 120 (35), 84 (55) and 49 (80). (Found: (*M*), 289.1683. C<sub>17</sub>H<sub>23</sub>O<sub>3</sub>N requires *M*, 289.1672).

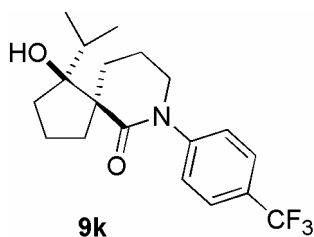

***rac*-(1*S*, 5*R*)-1-Hydroxy-1-isopropyl-7-(4-trifluoromethyl-phenyl)-7-aza-spiro[4.5]decan-6-one**  
**9k**

As for general procedure E, treatment of *E/Z*-3-(5-methyl-4-oxo-hexylidene)-1-(4-trifluoromethyl-phenyl)-piperidin-2-one **4k** (100 mg, 0.28 mmol, 1 eq) with SmI<sub>2</sub> (0.1 M in THF, 12 ml, 1.19 mmol, 4 eq) and MeOH (0.34 ml, 8.40 mmol, 30 eq), followed by

purification by flash column chromatography on silica gel eluting with 40% EtOAc in petroleum ether (40-60) *rac*-(1*S*, 5*R*)-1-hydroxy-1-isopropyl-7-(4-trifluoromethyl-phenyl)-7-aza-spiro[4.5]decan-6-one **9k** (79 mg, 0.22 mmol, 79%) as a white solid;  $\nu_{\max}$  (neat)/cm<sup>-1</sup> 3307 (OH), 2964, 1624 (C(O)), 1602, 1408, 1350, 1194, 1165, 1126, 1068, 1017, 982, 917, 844, 756 and 664;  $\delta_{\text{H}}$  (100 MHz, CDCl<sub>3</sub>) 0.93 (3H, d, *J* 7.0 Hz, CH<sub>3</sub>), 1.00 (3H, d, *J* 6.9 Hz, CH<sub>3</sub>), 1.68 (3H, m, 1H from CCH<sub>2</sub>CH<sub>2</sub> and CCH<sub>2</sub>), 1.99 (7H, m, CH(CH<sub>3</sub>)<sub>2</sub>, CH<sub>2</sub>CH<sub>2</sub>COH, CCH<sub>2</sub> and CH<sub>2</sub>COH), 2.48 (1H, m, 1H from CCH<sub>2</sub>CH<sub>2</sub>), 3.61 (1H, m, 1H from NCH<sub>2</sub>), 3.76 (1H, m, 1H from NCH<sub>2</sub>), 6.50 (1H, s, OH), 7.33 (2H, d, *J* 8.2 Hz, 2 × Ar-CH), 7.67 (2H, d, *J* 8.2 Hz, 2 × Ar-CH);  $\delta_{\text{C}}$  (100 MHz, CDCl<sub>3</sub>) 17.6 (CH<sub>3</sub>), 18.1 (CH<sub>3</sub>), 19.8 (CH<sub>2</sub>), 20.2 (CH<sub>2</sub>), 27.6 (CH<sub>2</sub>), 33.2 (CH), 36.9 (CH<sub>2</sub>), 37.4 (CH<sub>2</sub>), 51.9 (NCH<sub>2</sub>), 52.5 (C), 88.9 (COH), 123.7 (CF<sub>3</sub>, q, *J* 272 Hz), 126.5 (2 × Ar-CH), 126.7 (2 × Ar-CH), 129.3 (Ar-CCF<sub>3</sub>, q, *J* 32 Hz), 146.2 (Ar-CN), 177.7 (C(O)); *m/z* (CI mode) 356 (*M* + H, 100), 338 (10), 312 (8) and 255 (3). *m/z* (EI mode) 356 (*M* + H, 10), 338 (8), 312 (30), 256 (80), 243 (20), 228 (10), 200 (20), 187 (15), 174 (65), 145 (100), 123 (50), 117 (25), 107 (30), 95 (70), 91 (50), 79 (50), 69 (55) and 55 (40). (Found: (*M*), 355.1759. C<sub>19</sub>H<sub>24</sub>O<sub>2</sub>NF<sub>3</sub> requires *M*, 355.1754). mp (MeOH) 132 °C.

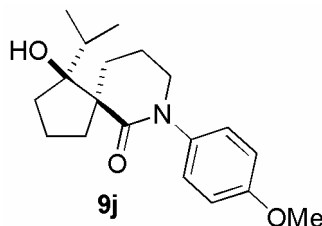

***rac*-(1*S*, 5*R*)-1-Hydroxy-1-isopropyl-7-(4-methoxy-phenyl)-7-aza-spiro[4.5]decan-6-one **9j****

As for general procedure E, treatment of *E/Z*-1-(4-methoxy-phenyl)-3-(5-methyl-4-oxo-hexylidene)-piperidin-2-one **4j** (110 mg, 0.35 mmol, 1 eq) with SmI<sub>2</sub> (0.1 M in THF, 14.0 ml, 1.40 mmol, 4 eq) and MeOH (0.42 ml, 10.5 mmol, 30 eq), followed by purification by flash column chromatography on silica gel eluting with 50% EtOAc in petroleum ether (40-60) *rac*-(1*S*, 5*R*)-1-hydroxy-1-isopropyl-7-(4-methoxy-phenyl)-7-aza-spiro[4.5]decan-6-one **9j** (76 mg, 0.24 mmol, 68%);  $\nu_{\max}$  (neat)/cm<sup>-1</sup> 3278 (OH), 2961,

2873, 2838, 1618 (C(O)), 1600, 1484, 1466, 1447, 1382, 1353, 1327, 1300, 1244, 1197, 1160, 1133, 1106, 1072, 1034, 1014, 982, 917, 833, 753 and 662;  $\delta_{\text{H}}$  (400 MHz,  $\text{CDCl}_3$ ) 0.86 (3H, d,  $J$  6.8 Hz,  $\text{CH}_3$ ), 0.92 (3H, d,  $J$  6.6 Hz,  $\text{CH}_3$ ), 1.54 (3H, m, 1H from  $\text{CH}_2$ , 1H from  $\text{CH}_2$ , 1H from  $\text{CH}_2$ ), 1.87 (7H, m,  $\text{CH}_2\text{CH}_2\text{N}$ , CH, 1H from  $\text{CH}_2$ , 1H from  $\text{CH}_2$ , 1H from  $\text{CH}_2$ , 1H from  $\text{CH}_2$ ), 2.39 (1H, m, 1H from  $\text{CH}_2$ ), 3.48 (1H, m, 1H from  $\text{NCH}_2$ ), 3.61 (1H, m, 1H from  $\text{NCH}_2$ ), 3.72 (3H, s,  $\text{OCH}_3$ ), 6.85 (2H, m,  $2 \times \text{Ar-CH}$ ), 7.01 (2H, m,  $2 \times \text{Ar-CH}$ );  $\delta_{\text{C}}$  (100 MHz,  $\text{CDCl}_3$ ) 17.5 ( $\text{CH}_3$ ), 18.1 ( $\text{CH}_2$ ), 19.8 ( $\text{CH}_2$ ), 20.2 ( $\text{CH}_2$ ), 27.6 ( $\text{CH}_2$ ), 33.2 (CH), 36.7 ( $\text{CH}_2$ ), 37.4 ( $\text{CH}_2$ ), 52.6 ( $\text{NCH}_2$ ), 55.5 ( $\text{OCH}_3$ ), 60.4 (C), 88.8 (COH), 114.7 ( $2 \times \text{Ar-CH}$ ), 127.3 ( $2 \times \text{Ar-CH}$ ), 135.9 (Ar-CN), 158.5 (Ar-CO), 177.7 (C(O));  $m/z$  (CI mode) 318 ( $M + \text{H}$ , 100), 300 (10), 274 (15), 218 (30) and 136 (15).  $m/z$  (EI mode) 317 ( $M$ , 20), 274 (20), 218 (100), 205 (10) and 136 (30). (Found: ( $M + \text{H}$ ), 318.2068.  $\text{C}_{19}\text{H}_{28}\text{O}_3\text{N}$  requires  $M + \text{H}$ , 318.2064).

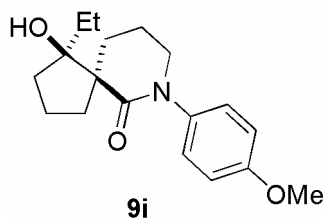

***rac*-(1*R*, 5*R*)-1-Ethyl-1-hydroxy-7-(4-methoxy-phenyl)-7-aza-spiro[4,5]decan-6-one  
**9i****

As for general procedure E, treatment of *E/Z* 1-(4-methoxy-phenyl)-3-(4-oxo-hexylidene)-piperidin-2-one **4i** (100 mg, 0.33 mmol, 1 eq) with  $\text{SmI}_2$  (0.1 M in THF, 13.3 ml, 1.33 mmol, 4 eq) and MeOH (0.40 ml, 9.96 mmol, 30 eq), followed by purification by flash column chromatography on silica gel eluting with 60% EtOAc in petroleum ether (40-60) gave *rac*-(1*R*, 5*R*)-1-ethyl-1-hydroxy-7-(4-methoxy-phenyl)-7-aza-spiro[4,5]decan-6-one **9i** (95 mg, 0.29 mmol, 88%) as a yellow oil;  $\nu_{\text{max}}$  (neat)/ $\text{cm}^{-1}$  3283 (OH), 2957, 1617 (C(O)), 1511, 1452, 1414, 1352, 1328, 1299, 1243, 1196, 1160, 1135, 1106, 1039, 977, 958, 913, 833, 816, 753, 660, 578 and 440;  $\delta_{\text{H}}$  (400 MHz,  $\text{CDCl}_3$ ) 0.92 (3H, t,  $J$  7.5 Hz,  $\text{CH}_3$ ), 1.59 (5H, m, 2H from  $\text{CH}_2\text{CH}_3$  and 1H from  $\text{CH}_2$  and 1H from  $\text{CH}_2$  and 1H from  $\text{CH}_2$ ), 1.74 (2H, m, 1H from  $\text{CH}_2$  and 1H from  $\text{CH}_2$ ), 1.86 (2H, m, 1H from  $\text{CH}_2\text{CH}_2\text{N}$  and 1H from  $\text{CH}_2$ ), 1.96 (2H, m,  $\text{CH}_2$ ), 2.37 (1H, m, 1H from

$\text{CH}_2\text{CH}_2\text{N}$ ), 3.53 (2H, m,  $\text{NCH}_2$ ), 3.71 (3H, s,  $\text{OCH}_3$ ), 6.84 (2H, d,  $J$  9.1 Hz,  $2 \times \text{Ar-CH}$ ), 7.02 (2H, d,  $J$  8.8 Hz,  $2 \times \text{Ar-CH}$ );  $\delta_{\text{C}}$  (100 MHz,  $\text{CDCl}_3$ ) 8.76 ( $\text{CH}_3$ ), 19.9 ( $\text{CH}_2$ ), 20.2 ( $\text{CH}_2$ ), 28.4 ( $\text{CH}_2$ ), 29.4 ( $\text{CH}_2$ ), 36.1 ( $\text{CH}_2$ ), 37.6 ( $\text{CH}_2$ ), 52.4 ( $\text{NCH}_2$ ), 52.7 (C), 55.5 ( $\text{OCH}_3$ ), 86.8 (COH), 114.7 ( $2 \times \text{Ar-CH}$ ), 127.5 ( $2 \times \text{Ar-CH}$ ), 135.9 (Ar-CN), 158.5 (Ar-CO), 177.3 (C(O));  $m/z$  (ES mode) 467 (30), 326 ( $\text{M} + 23$ , 100), 304 ( $\text{M} + \text{H}$ , 10).

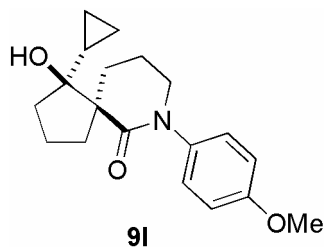

***rac*-(1*R*, 5*R*)-1-Cyclopropyl-1-hydroxy-7-(4-methoxy-phenyl)-7-aza-spiro[4.5]decan-6-one **9l****

As for general procedure E, treatment of *E/Z* 3-(4-Cyclopropyl-4-oxo-butyldiene)-1-(4-methoxy-phenyl)-piperidin-2-one **4l** (35 mg, 0.11 mmol, 1 eq) with  $\text{SmI}_2$  (0.1 M in THF, 4.45 ml, 0.45 mmol, 4 eq) and MeOH (0.14 ml, 3.36 mmol, 30 eq), followed by purification by flash column chromatography on silica gel eluting with 40% EtOAc in petroleum ether (40-60) gave *rac*-(1*R*, 5*R*)-1-cyclopropyl-1-hydroxy-7-(4-methoxy-phenyl)-7-aza-spiro[4.5]decan-6-one **9l** (29 mg, 0.09 mmol, 82%) as a yellow oil;  $\delta_{\text{H}}$  (400 MHz,  $\text{CDCl}_3$ ) 0.29 (2H, m, *c*-Pr- $\text{CH}_2$ ), 0.57 (1H, m, *c*-Pr-CH), 0.86 (2H, m, *c*-Pr- $\text{CH}_2$ ), 1.66 (4H, m,  $2 \times \text{CH}_2$ ), 1.91 (4H, m, 2H from  $\text{CH}_2\text{CH}_2\text{N}$  and 2H from  $\text{CH}_2$ ), 2.09 (1H, m, 1H from  $\text{CH}_2$ ), 2.38 (1H, m, 1H from  $\text{CH}_2$ ), 3.54 (2H, m,  $\text{NCH}_2$ ), 3.74 (3H, s,  $\text{OCH}_3$ ), 6.32 (1H, s, OH), 6.86 (2H, m,  $2 \times \text{Ar-CH}$ ), 7.03 (2H, m,  $2 \times \text{Ar-CH}$ );  $\delta_{\text{C}}$  (100 MHz,  $\text{CDCl}_3$ ) -1.36 (*c*-Pr- $\text{CH}_2$ ), 0.00 (*c*-Pr- $\text{CH}_2$ ), 13.9 (CH), 19.5 ( $\text{CH}_2$ ), 19.8 ( $\text{CH}_2$ ), 28.3 ( $\text{CH}_2$ ), 35.6 ( $\text{CH}_2$ ), 36.5 ( $\text{CH}_2$ ), 52.0 ( $\text{NCH}_2$ ), 53.4 (C), 54.9 ( $\text{OCH}_3$ ), 83.6 (COH), 114.1 ( $2 \times \text{Ar-CH}$ ), 126.9 ( $2 \times \text{Ar-CH}$ ), 135.5 (Ar-CN), 157.9 (Ar-CO), 176.6 (C(O));

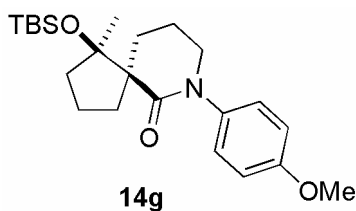

***rac*-(1*R*, 5*R*)-1-(*tert*-Butyl-dimethyl-silanyloxy)-7-(4-methoxy-phenyl)-1-methyl-7-aza-spiro[4.5]decan-6-one **14g****

To a stirred solution of *rac*-(1*R*, 5*R*)-1-hydroxy-7-(4-methoxy-phenyl)-1-methyl-7-aza-spiro[4.5]decan-6-one **9g** (0.06 g, 0.17 mmol, 1 eq) in DMF (4 ml) at 0 °C was added, 2,6-lutidine (0.21 ml, 1.07 mmol, 10 eq) and *tert*-butyldimethylsilyl trifluoromethanesulfonate (0.24 ml, 1.04 mmol, 6 eq) and warmed to room temperature and left to stir for 2 hours. The reaction was quenched with the addition of aqueous saturated solution of NaHCO<sub>3</sub> (5 ml) and the aqueous layer separated and extracted with EtOAc (3 × 10 ml). The combined organic extracts were dried (Na<sub>2</sub>SO<sub>4</sub>) and concentrated *in vacuo* to give the crude product. Purification by flash column chromatography on silica gel eluting with a solvent gradient of 20% EtOAc in petroleum ether (40-60) to give *rac*-(1*R*, 5*R*)-1-(*tert*-butyl-dimethyl-silanyloxy)-7-(4-methoxy-phenyl)-1-methyl-7-aza-spiro[4.5]decan-6-one **14g** (79 mg, 0.17 mmol, 97%) as a yellow oil;  $\nu_{\max}$  (neat)/cm<sup>-1</sup> 2932, 1649 (C(O)), 1510, 1462, 1427, 1349, 1322, 1245, 1183, 1162, 1143, 1105, 1037, 1020, 834, 773 and 662.;  $\delta_{\text{H}}$  (400 MHz, CDCl<sub>3</sub>) 0.09 (3H, s, SiCH<sub>3</sub>), 0.14 (3H, s, SiCH<sub>3</sub>), 0.91 (9H, s, 3 × CCH<sub>3</sub>), 1.28 – 1.36 (1H, m, 1H from CCH<sub>2</sub>), 1.30 (3H, s, CH<sub>3</sub>), 1.44 – 1.58 (1H, m, 1H from CCH<sub>2</sub>CH<sub>2</sub>), 1.66 – 1.75 (2H, m, 1H from CH<sub>2</sub>CH<sub>2</sub>N, and 1H from CH<sub>2</sub>CO), 1.77 - 1.82 (1H, m, 1H from CH<sub>2</sub>CH<sub>2</sub>CH<sub>2</sub>N), 1.87 – 1.99 (1H, m, CCH<sub>2</sub>CH<sub>2</sub>), 2.03 - 2.09 (1H, m, CH<sub>2</sub>CH<sub>2</sub>CH<sub>2</sub>N), 2.16 (1H, dq, *J* 10.4, 3.8 Hz, 1H from CCH<sub>2</sub>), 2.41 - 2.52 (1H, m, 1H from CH<sub>2</sub>CH<sub>2</sub>N), 2.62 (1H, apparent q, *J* 10.4 Hz, 1H from CH<sub>2</sub>CO), 3.54 - 3.65 (2H, m, CH<sub>2</sub>N), 3.78 (3H, s, OCH<sub>3</sub>), 6.89 (2H, dd, *J* 9.1, 2.3 Hz, 2 × Ar-CH), 7.19 (2H, dd, *J* 9.1, 2.3 Hz, 2 × Ar-CH);  $\delta_{\text{C}}$  (100 MHz, CDCl<sub>3</sub>) 0.00 (2 × SiCH<sub>3</sub>), 20.2 (CH<sub>2</sub>), 21.5 (2 × CH<sub>2</sub>), 22.5 (SiC), 28.2 (3 × SiCCH<sub>3</sub>), 31.8 (CH<sub>3</sub>), 37.5 (CH<sub>2</sub>), 42.5 (CH<sub>2</sub>), 54.3 (NCH<sub>2</sub>), 57.4 (C), 57.6 (OCH<sub>3</sub>), 87.3 (COSi), 116.3 (2 × Ar-CH), 129.8 (2 × Ar-CH), 139.4 (Ar-CN), 159.8 (Ar-CO), 176.9 (C(O)); *m/z* (ES<sup>+</sup> mode) 824 (30), 404 (*M* + H, 100). (Found: (*M* + H), 404.2623. C<sub>23</sub>H<sub>38</sub>O<sub>3</sub>NSi requires *M* + H, 404.2615).

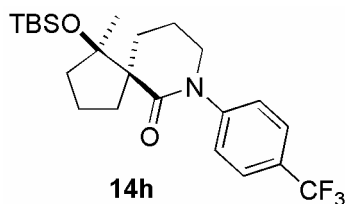

***rac*-(1*R*, 5*R*)-1-(*tert*-Butyldimethylsilyloxy)-1-methyl-7-(4-trifluoromethyl-phenyl)-7-aza-spiro[4.5]decan-6-one **14h****

To a stirred solution of *rac*-(1*R*, 5*R*)-1-hydroxy-1-methyl-7-(4-trifluoromethyl-phenyl)-7-aza-spiro[4.5]decan-6-one **9h** (27 mg, 0.08 mmol, 1 eq) in DMF (2 ml) at 0 °C was added, 2,6-lutidine (97 µl, 0.83 mmol, 10 eq) and *tert*-butyldimethylsilyl trifluoromethanesulfonate (0.13 ml, 0.49 mmol, 6 eq) and warmed to room temperature and left to stir for 2 hours. The reaction was quenched with the addition of aqueous saturated solution of NaHCO<sub>3</sub> (5 ml) and the aqueous layer separated and extracted with EtOAc (3 × 10 ml). The combined organic extracts were dried (Na<sub>2</sub>SO<sub>4</sub>) and concentrated *in vacuo* to give the crude product. Purification by flash column chromatography on silica gel eluting with a solvent gradient of 30% EtOAc in petroleum ether (40-60) to give *rac*-(1*R*, 5*R*)-1-(*tert*-butyldimethylsilyloxy)-1-methyl-7-(4-trifluoromethyl-phenyl)-7-aza-spiro[4.5]decan-6-one **14h** (36 mg, 0.08 mmol, 100%) as a yellow oil;  $\nu_{\max}$  (neat)/cm<sup>-1</sup> 2933, 2858, 1652 (C(O)), 1612, 1518, 1472, 1423, 1408, 1374, 1349, 1322, 1294, 1257, 1181, 1164, 1125, 1068, 1036, 1019, 958, 835, 774 and 734;  $\delta_{\text{H}}$  (400 MHz, CDCl<sub>3</sub>) 0.01 (3H, s, SiCH<sub>3</sub>), 0.05 (3H, s, SiCH<sub>3</sub>), 0.78 (9H, s, 3 × CCH<sub>3</sub>), 1.23 (3H, s, CH<sub>3</sub>), 1.26 (1H, m, 1H from CH<sub>2</sub>), 1.45 (1H, m, 1H from CH<sub>2</sub>), 1.65 (3H, m, 1H from CH<sub>2</sub>CH<sub>2</sub>N and 2H from CH<sub>2</sub>), 1.84 (1H, dq, *J* 10.9, 5.9 Hz, 1H from CH<sub>2</sub>), 2.04 (2H, m, 2 × 1H from CH<sub>2</sub>), 2.39 (1H, m, 1H from CH<sub>2</sub>CH<sub>2</sub>N), 2.51 (1H, apparent q, *J* 10.9 Hz, 1H from CH<sub>2</sub>), 3.52 (1H, m, 1H from NCH<sub>2</sub>), 3.61 (1H, dt, *J* 11.0, 5.5 Hz, 1H from NCH<sub>2</sub>), 7.36 (2H, d, *J* 8.3 Hz, 2 × Ar-CH), 7.52 (2H, d, *J* 8.3 Hz, 2 × Ar-CH);  $\delta_{\text{C}}$  (100 MHz, CDCl<sub>3</sub>) 0.27 (2 × SiCH<sub>3</sub>), 20.2 (CH<sub>2</sub>), 21.5 (CH<sub>2</sub>), 22.6 (SiC), 28.0 (3 × CCH<sub>3</sub>), 28.1 (CH<sub>3</sub>), 32.3 (CH<sub>2</sub>), 37.5 (CH<sub>2</sub>), 42.5 (CH<sub>2</sub>), 53.6 (NCH<sub>2</sub>), 57.8 (C), 87.6 (COSi), 126.3 (Ar-CCF<sub>3</sub>, q, *J* 271 Hz), 127.9 (2 × Ar-CH), 128.6 (2 × Ar-CH), 129.9 (Ar-CCF<sub>3</sub>, q, *J* 32 Hz), 149.4 (Ar-C), 177.2 (C(O)); *m/z* (CI mode) 442 (*M* + H, 400), 383 (60), 310 (100), 256 (30), 186 (10),

90 (20), 73 (50) and 57 (25).  $m/z$  (EI mode) 442 ( $M + H$ , 5), 384 (100), 310 (40), 256 (30), 186 (20), 174 (25), 161 (30), 145 (25), 74 (50) and 48 (55). (Found: ( $M$ ), 441.2313.  $C_{23}H_{34}O_2NF_3Si$  requires  $M$ , 441.2305)

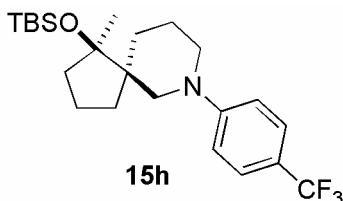

***rac*-(1*R*, 5*S*)-1-(*tert*-Butyl-dimethyl-silanyloxy)-1-methyl-7-(4-trifluoromethyl-phenyl)-7-aza-spiro[4.5]decane **15h****

To a stirred solution of *rac*-(1*R*, 5*S*)-1-(*tert*-butyl-dimethyl-silanyloxy)-1-methyl-7-(4-trifluoromethyl-phenyl)-7-aza-spiro[4.5]decan-6-one **14h** (30 mg, 0.068 mmol, 1 eq) in THF (5 ml), was added  $BH_3 \cdot THF$  (1.0 M, 0.85 ml, 0.82 mmol, 12 eq) solution dropwise and the reaction heated to 60 °C and stirred for 18 hours. The reaction was quenched by the addition of 1M NaOH (2 ml) and the aqueous layer separated and extracted with EtOAc (3 × 10 ml). The combined organics were dried ( $NaSO_4$ ) and concentrated *in vacuo* to give crude product. Purification by flash column chromatography on silica gel eluting with 5% EtOAc in petroleum ether (40-60) gave *rac*-(1*R*, 5*S*)-1-(*tert*-butyl-dimethyl-silanyloxy)-1-methyl-7-(4-trifluoromethyl-phenyl)-7-aza-spiro[4.5]decane **15h** (22 mg, 0.05 mmol, 74%);  $\nu_{max}$  (neat)/ $cm^{-1}$  2954, 2857, 1615, 1572, 1462, 1382, 1325, 1248, 1195, 1162, 1113, 1071, 1021, 955, 873, 833, 773 and 650;  $\delta_H$  (500 MHz,  $CDCl_3$ ) 0.10 (6H, s, 2 ×  $SiCH_3$ ), 0.90 (9H, s, 3 ×  $CCH_3$ ), 1.25 (3H, s,  $CH_3$ ), 1.40 (2H, m, 1H from  $CCH_2$  and 1H from  $CCH_2CH_2$ ), 1.58 (2H, m, 1H from  $CCH_2$  and 1H from  $CCH_2CH$ ), 1.75 (4H, m, 2H from  $CH_2COSi$  and 1H from  $CH_2CH_2N$  and 1H from  $CCH_2$ ), 1.88 (2H, m, 1H from  $CH_2CH_2N$  and 1H from  $CCH_2$ ), 2.67 (1H, d,  $J$  8.5 Hz, 1H from  $CCH_2N$ ), 2.83 (1H, d,  $J$  12.8 Hz, 1H from  $CCH_2N$ ), 3.70 (2H, dd,  $J$  31.0, 12.1 Hz,  $NCH_2$ ), 6.95 (2H, m, 2 × Ar-CH), 7.46 (2H, d,  $J$  7.9 Hz, 2 × Ar-CH);  $\delta_C$  (125 MHz,  $CDCl_3$ ) -0.40 ( $SiCH_3$ ), -0.01 ( $SiCH_3$ ), 20.4 (2 ×  $CH_2$ ), 21.2 ( $CH_2$ ), 24.5 ( $CH_3$ ), 25.2 ( $SiC$ ), 28.0 (3 ×  $CCH_3$ ), 31.8 ( $CH_2$ ), 33.5 ( $CH_2$ ), 40.8 (2 ×  $NCH_2$ ), 51.1 (C), 86.7 ( $COSi$ ), 128.5 (4 × Ar-



CH);  $m/z$  (ES+ mode) 440 (20), 428 ( $M + H$ , 100), 401 (5), 327 (20), 301 (10) and 117 (10).

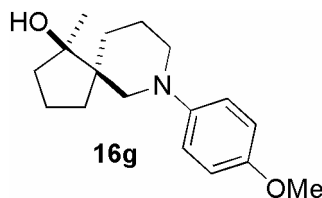

***rac*-(1*R*, 5*S*)-7-(4-Methoxy-phenyl)-1-methyl-7-aza-spiro[4.5]decan-1-ol **16g****

To a stirred solution of *rac*-(1*R*, 5*R*)-1-hydroxy-7-(4-methoxy-phenyl)-1-methyl-7-aza-spiro[4.5]decan-6-one **9g** (25 mg, 0.087 mmol, 1 eq) in THF (2 ml), was added  $BH_3 \cdot THF$  (1.0 M, 1.04 ml, 1.04 mmol, 12 eq) solution dropwise and the reaction heated to 60 °C and stirred for 18 hours. The reaction was quenched by the addition of 1M NaOH (2 ml) and the aqueous layer separated and extracted with EtOAc (3  $\times$  10 ml). The combined organics were dried ( $NaSO_4$ ) and concentrated *in vacuo* to give crude product. Purification by flash column chromatography on silica gel eluting with 20% EtOAc in petroleum ether (40-60) gave *rac*-(1*R*, 5*S*)-7-(4-methoxy-phenyl)-1-methyl-7-aza-spiro[4.5]decan-1-ol **16g** (24 mg, 0.087 mmol, 100%) as a yellow oil;  $\nu_{max}$  (neat)/ $cm^{-1}$  3401 (OH), 2938, 1713, 1666, 1511, 1443, 1372, 1245, 1180, 1122, 1036, 943, 826, 728 and 665;  $\delta_H$  (500 MHz,  $CDCl_3$ ) 1.19 (3H, s,  $CH_3$ ), 1.37- 1.79 (8H, m, 4  $\times$   $CH_2$ ), 1.95 - 2.04 (2H, m,  $CH_2CH_2N$ ) 2.55 (1H, m, 1H from  $CCH_2N$ ), 2.69 (1H, m, 1H from  $CH_2 \cdot CH_2N$ ), 3.12 (1H, m, 1H from  $CH_2CH_2N$ ), 3.39 (1H, m, 1H from  $CCH_2N$ ), 3.69 (3H, s,  $OCH_3$ ), 6.78 (2H, d,  $J$  8.8 Hz, 2  $\times$  Ar-CH), 6.95 (2H, m, 2  $\times$  Ar-CH);  $\delta_C$  (125 MHz,  $CDCl_3$ ) 14.2 ( $CH_2$ ), 18.5 ( $CH_3$ ), 22.7 ( $CH_2$ ), 24.8 ( $CH_2$ ), 30.9 ( $CH_2$ ), 35.7 ( $CH_2$ ), 41.7 ( $NCH_2$ ), 55.5 ( $OCH_3$ ), 60.4 (C), 62.6 ( $NCH_2$ ), 81.9 (COH), 114.4 (2  $\times$  Ar-CH), 114.9 (2  $\times$  Ar-CH), 121.2 (Ar-CN), 123.8 (Ar-CO);  $m/z$  (CI mode) 276 ( $M + H$ , 100), 258 (5), 149 (10) and 135 (3).  $m/z$  (EI mode) 275 ( $M$ , 5), 150 (80), 135 (100), 120 (25) and 107 (10). (Found: ( $M$ ), 275.1886.  $C_{17}H_{25}O_2N$  requires  $M$ , 275.1880).

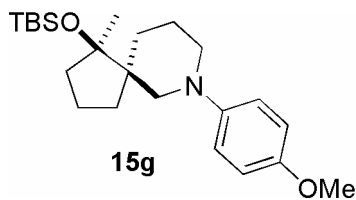

***rac*-(1*R*, 5*S*)-1-(*tert*-Butyldimethylsilyloxy)-7-(4-methoxy-phenyl)-1-methyl-7-aza-spiro[4.5]decane **15g****

To a stirred solution of *rac*-(1*R*, 5*R*)-1-(*tert*-butyl-dimethyl-silanyloxy)-7-(4-methoxy-phenyl)-1-methyl-7-aza-spiro[4.5]decan-6-one **14g** (43 mg, 0.11 mmol, 1 eq) in THF (5 ml), was added BH<sub>3</sub>•THF (1.0 M, 1.31 ml, 1.31 mmol, 12 eq) solution dropwise and the reaction heated to 60 °C and stirred for 18 hours. The reaction was quenched by the addition of 1M NaOH (2 ml) and the aqueous layer separated and extracted with EtOAc (3 × 10 ml). The combined organics were dried (NaSO<sub>4</sub>) and concentrated *in vacuo* to give crude product. Purification by flash column chromatography on silica gel eluting with 5% EtOAc in petroleum ether (40-60) gave *rac*-(1*R*, 5*S*)-1-(*tert*-butyldimethylsilyloxy)-7-(4-methoxy-phenyl)-1-methyl-7-aza-spiro[4.5]decane **15g** (38 mg, 0.08 mmol, 76%) as a yellow oil;  $\nu_{\text{max}}$  (neat)/cm<sup>-1</sup> 2952, 2361, 2055, 1741, 1559, 1462, 1442, 1377, 1359, 1330, 1286, 1246, 1187, 1129, 1040, 1005, 988, 954, 874, 833 and 772;  $\delta_{\text{H}}$  (500 MHz, CDCl<sub>3</sub>) 0.00 (3H, s, SiCH<sub>3</sub>), 0.01 (3H, s, SiCH<sub>3</sub>), 0.81 (9H, s, 3 × CCH<sub>3</sub>), 1.13 (3H, s, CH<sub>3</sub>), 1.16 – 1.25 (2H, m, CH<sub>2</sub>), 1.44 – 1.51 (1H, m, 1H from CH<sub>2</sub>), 1.53 – 1.69 (5H, m, CH<sub>2</sub>, 1H from CH<sub>2</sub>, 1H from CH<sub>2</sub>, 1H from CH<sub>2</sub>), 1.75 – 1.77 (1H, m, 1H from CH<sub>2</sub>), 1.90 (1H, m, 1H from CH<sub>2</sub>), 2.35 (1H, m, 1H from CH<sub>2</sub>CH<sub>2</sub>N), 2.47 (1H, m, 1H from CCH<sub>2</sub>N), 3.28 (1H, d, *J* 11.7 Hz, 1H from CCH<sub>2</sub>N), 3.35 (1H, d, *J* 11.0 Hz, 1H from CH<sub>2</sub>CH<sub>2</sub>N), 3.68 (3H, s, OCH<sub>3</sub>), 6.73 (2H, m, 2 × Ar-CH), 6.78 (2H, m, 2 × Ar-CH);  $\delta_{\text{C}}$  (125 MHz, CDCl<sub>3</sub>) -0.40 (SiCH<sub>3</sub>), -0.00 (SiCH<sub>3</sub>), 20.4 (SiC), 21.3 (CH<sub>2</sub>), 25.1 (CH<sub>3</sub>), 25.2 (CH<sub>2</sub>), 28.0 (3 × SiCCH<sub>3</sub>), 31.9 (CH<sub>2</sub>), 33.8 (CH<sub>2</sub>), 40.9 (CH<sub>2</sub>), 50.9 (C), 53.2 (NCH<sub>2</sub>), 57.7 (OCH<sub>3</sub>), 59.7 (NCH<sub>2</sub>), 86.7 (COSi), 116.4 (2 × ArCH), 120.6 (2 × Ar-CH), 149.8 (Ar-CN), 155.2 (Ar-CO); *m/z* (ES<sup>+</sup> mode) 390 (*M* + H, 100) and 284 (10). (Found: (*M* + H), 390.2830. C<sub>23</sub>H<sub>40</sub>O<sub>2</sub>NSi requires *M*, 390.2823).

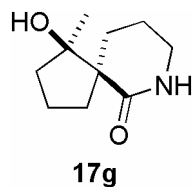

***rac*-(1*R*, 5*S*)-1-Hydroxy-1-methyl-7-aza-spiro[4.5]decan-6-one **17g****

To a solution of *rac*-(1*R*, 5*R*)-1-hydroxy-7-(4-methoxy-phenyl)-1-methyl-7-aza-spiro[4.5]decan-6-one **9g** (50 mg, 0.18 mmol, 1 eq) in CH<sub>3</sub>CN (90 ml) and H<sub>2</sub>O (10 ml), was added NaClO<sub>4</sub> (22 mg, 1.73 mmol, 26 eq). The electrolysis was carried out at room temperature in a divided glass cell equipped with two platinum electrodes. The potential was maintained at a constant value of 1.6 V for 37 hours. The two compartments of the glass cell were separated by a porous glass disk. The working electrode was a Pt plate (2 cm<sup>2</sup>). The reference electrode was a Ag/AgCl electrode to which the potential is referred. These two electrodes were placed in the anodic compartment of the cell. The counter electrode was a Pt grid and was placed in the cathodic compartment filled with the same solution. The potentiostat galvanostat was included in the circuit. The organic solution was then concentrated and the aqueous layer separated and extracted with EtOAc (3 × 50 ml). The combined organics were dried (NaSO<sub>4</sub>) and concentrated *in vacuo* to give crude product. Purification by flash column chromatography on silica gel eluting with EtOAc gave *rac*-(*R*)-1-Hydroxy-1-methyl-7-aza-spiro[4.5]decan-6-one **17g** ( 22 mg, 0.12 mmol, 67%, 98% based on recovered starting material) as a clear oil;  $\nu_{\max}$  (neat)/cm<sup>-1</sup> 3275 (OH), 2958, 1632 (C(O)), 1489, 1465, 1456, 1452, 1394, 1373, 1355, 1331, 1301, 1281, 1232, 1206, 1174, 1139, 1109, 1068, 1016, 971, 935. 907 and 867;  $\delta_{\text{H}}$  (500 MHz, CDCl<sub>3</sub>) 1.22 (3H, s, CH<sub>3</sub>), 1.48 (1H, m, 1H from CCH<sub>2</sub>), 1.62 (3H, m, 1H from CH<sub>2</sub>CH<sub>2</sub>COH and 1H from CH<sub>2</sub>CH<sub>2</sub>CH<sub>2</sub>N and 1H from CCH<sub>2</sub>), 1.76 (4H, m, 2H from CH<sub>2</sub>CH<sub>2</sub>N and 1H from CH<sub>2</sub>CCOH and 1H from CH<sub>2</sub>CH<sub>2</sub>CH<sub>2</sub>N), 1.91 (1H, m, 1H from CH<sub>2</sub>CH<sub>2</sub>COH), 2.31 (1H, m, 1H from CH<sub>2</sub>CCOH), 3.25 (2H, m, NCH<sub>2</sub>), 5.97 (1H, s, OH), 6.32 (1H, s, NH);  $\delta_{\text{C}}$  (125 MHz, CDCl<sub>3</sub>) 19.6 (CH<sub>2</sub>), 20.2 (CH<sub>2</sub>), 22.8 (CH<sub>3</sub>), 28.5 (CH<sub>2</sub>), 35.3 (CH<sub>2</sub>), 38.3 (CH<sub>2</sub>), 42.4 (NCH<sub>2</sub>), 53.2 (C), 83.8 (COH), 178.5 (C(O));  $m/z$  (CI mode) 184 ( $M + H$ , 100), 166 (30) and 112 (80).  $m/z$  (EI mode) 183 ( $M$ , 5), 166 (20), 112 (100) and 49 (20). (Found: ( $M + H$ ), 184.1337. C<sub>10</sub>H<sub>18</sub>O<sub>2</sub>N requires  $M + H$ , 184.1332).

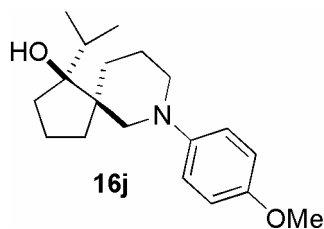

***rac*-(1*S*, 5*S*)-1-Isopropyl-7-(4-methoxy-phenyl)-7-aza-spiro[4.5]decan-1-ol **16j****

To a stirred solution of (*Z*)-1-(4-methoxy-phenyl)-3-(5-methyl-4-oxo-hexylidene)-piperidin-2-one **4j** (40 mg, 0.13 mmol, 1 eq) in THF (3 ml), was added  $\text{BH}_3 \cdot \text{THF}$  (1.0 M, 1.50 ml, 1.51 mmol, 12 eq) solution dropwise and the reaction heated to 60 °C and stirred for 18 hours. The reaction was quenched by the addition of 1M NaOH (2 ml) and the aqueous layer separated and extracted with EtOAc ( $3 \times 10$  ml). The combined organics were dried ( $\text{NaSO}_4$ ) and concentrated *in vacuo* to give crude product. Purification by flash column chromatography on silica gel eluting with 20% EtOAc in petroleum ether (40-60) gave *rac*-(1*S*, 5*S*)-1-isopropyl-7-(4-methoxy-phenyl)-7-aza-spiro[4.5]decan-1-ol **16j** (38 mg, 0.125 mmol, 95%) as a yellow oil;  $\nu_{\text{max}}$  (neat)/ $\text{cm}^{-1}$  3583 (OH), 2946, 2361, 1510, 1464, 1381, 1290, 1242, 1182, 1122, 1039, 947, 885, 826 and 665;  $\delta_{\text{H}}$  (400 MHz,  $\text{CDCl}_3$ ) 0.89 (3H, d,  $J$  6.8 Hz,  $\text{CHCH}_3$ ), 0.97 (3H, d,  $J$  6.6 Hz,  $\text{CHCH}_3$ ), 1.25 (2H, m,  $\text{CH}_2$ ), 1.48 (1H, m, CH), 1.82 (8H, m,  $4 \times \text{CH}_2$ ), 2.95 (4H, m,  $2 \times \text{NCH}_2$ ), 3.69 (3H, s,  $\text{OCH}_3$ ), 6.76 (2H, d,  $J$  8.6 Hz,  $2 \times \text{Ar-CH}$ ), 6.97 (2H, m,  $2 \times \text{Ar-CH}$ );  $\delta_{\text{C}}$  (100 MHz,  $\text{CDCl}_3$ ) 18.2 ( $\text{CH}_2$ ), 19.2 ( $\text{CH}_3$ ), 19.9 ( $\text{CH}_3$ ), 23.2 ( $2 \times \text{CH}_2$ ), 29.7 ( $\text{CH}_2$ ), 33.9 (CH), 36.7 ( $\text{CH}_2$ ), 37.2 ( $\text{NCH}_2$ ), 47.8 ( $\text{NCH}_2$ ), 55.6 ( $\text{OCH}_3$ ), 62.0 (C), 88.3 (COH), 114.4 ( $4 \times \text{Ar-CH}$ ), 120.2 (Ar-CN), 143.9 (Ar-CO);  $m/z$  ( $\text{ES}^+$  mode) 326 ( $(M + \text{Na})$  30), 304 ( $(M + \text{H})$  100), 289 (10), 243 (10). (Found: ( $M + \text{H}$ ), 304.2266.  $\text{C}_{19}\text{H}_{30}\text{O}_2\text{N}$  requires  $M + \text{H}$ , 304.2271).

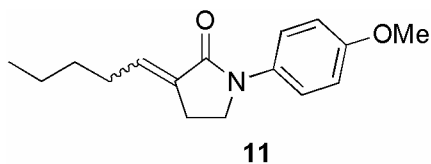

***E/Z* 1-(4-Methoxy-phenyl)-3-pentylidene-pyrrolidin-2-one **11****

As for general procedure B,  $K_2CO_3$  (0.83 g, 6.02 mmol, 1.1 eq) was added to a solution of 18-crown-6 (2.89 g, 10.9 mmol, 2 eq) and 1-(4-methoxy-phenyl)-2-oxo-pyrrolidin-3-yl]-phosphonic acid diethyl ester **6a** (1.79 g, 5.47 mmol, 1 eq) in THF (40 ml), followed by addition of valeraldehyde (0.75 ml, 7.11 mmol, 1.3 eq) in THF (20 ml) to give, after work up and purification by flash column chromatography on silica gel eluting with 20% EtOAc in petroleum ether (40-60) gave (*E*)-1-(4-methoxy-phenyl)-3-pentylidene-pyrrolidin-2-one **11** (0.24 g, 1.1 mmol, 21%) as a yellow oil;  $\nu_{\max}$  (neat)/ $\text{cm}^{-1}$  2956, 1881, 1685 (C(O)), 1513, 1486, 1465, 1443, 1396, 1321, 1293, 1252, 1182, 1122, 1080, 1032, 829, 752, 667 and 591;  $\delta_{\text{H}}$  (400 MHz,  $\text{CDCl}_3$ ) 0.85 (3H, t,  $J$  7.2 Hz,  $\text{CH}_3$ ), 1.37 (4H, m,  $\text{CH}_2\text{CH}_2\text{CH}_3$ ), 2.11 (2H, q,  $J$  7.4 Hz,  $\text{CH}_2\text{CH}$ ), 2.71 (2H, m,  $\text{CH}_2\text{CH}_2\text{N}$ ), 3.74 (5H, m, 3H from  $\text{OCH}_3$  and 2H from  $\text{CH}_2\text{N}$ ), 6.50 (1H, m,  $\text{CH}$ ), 6.84 (2H, d,  $J$  9.1 Hz,  $2 \times \text{Ar-CH}$ ), 7.55 (2H, d,  $J$  9.5 Hz,  $2 \times \text{Ar-CH}$ );  $\delta_{\text{C}}$  (75 MHz,  $\text{CDCl}_3$ ) 13.9 ( $\text{CH}_3$ ), 21.5 ( $\text{CH}_2$ ), 22.5 ( $\text{CH}_2$ ), 25.8 ( $\text{CH}_2$ ), 30.6 ( $\text{CH}_2$ ), 45.7 ( $\text{CH}_2\text{N}$ ), 55.5 ( $\text{OCH}_3$ ), 114.0 ( $2 \times \text{Ar-CH}$ ), 121.3 ( $2 \times \text{Ar-CH}$ ), 131.7 ( $\text{Ar-CN}$ ), 134.7 ( $\text{CH}$ ), 138.7 (C), 156.5 ( $\text{Ar-CO}$ ), 167.4 (C(O));  $m/z$  (CI mode) 260 ( $M + \text{H}$ , 100).  $m/z$  (EI mode) 259 ( $M$ , 100), 230 (60) and 202 (20). (Found: ( $M + \text{H}$ ), 260.1650.  $\text{C}_{16}\text{H}_{22}\text{O}_2\text{N}$  requires  $M + \text{H}$ , 260.1645).

Further elution gave (*Z*)-1-(4-methoxy-phenyl)-3-pentylidene-pyrrolidin-2-one **11** (0.59 g, 2.3 mmol, 42%) as a yellow oil.  $\delta_{\text{H}}$  (400 MHz,  $\text{CDCl}_3$ ) 0.82 (3H, t,  $J$  7.1 Hz,  $\text{CH}_3$ ), 1.30 (4H, m, 4H from  $\text{CH}_2\text{CH}_2\text{CH}_3$ ), 2.69 (4H, m, 2H from  $\text{CH}_2\text{CH}$  and 2H from  $\text{CH}_2\text{CH}_2\text{N}$ ), 3.69 (2H, t,  $J$  7.0 Hz,  $\text{CH}_2\text{N}$ ), 3.70 (3H, s,  $\text{OCH}_3$ ), 5.86 (1H, m,  $\text{CH}$ ), 6.79 (2H, d,  $J$  6.9 Hz,  $2 \times \text{Ar-CH}$ ), 7.49 (2H, d,  $J$  9.3 Hz,  $2 \times \text{Ar-CH}$ );  $\delta_{\text{C}}$  (75 MHz,  $\text{CDCl}_3$ ) 13.9 ( $\text{CH}_3$ ), 21.5 ( $\text{CH}_2$ ), 22.5 ( $\text{CH}_2$ ), 25.8 ( $\text{CH}_2$ ), 30.6 ( $\text{CH}_2$ ), 45.7 ( $\text{CH}_2\text{N}$ ), 55.5 ( $\text{OCH}_3$ ), 114.0 ( $2 \times \text{Ar-CH}$ ), 121.3 ( $2 \times \text{Ar-CH}$ ), 131.7 ( $\text{Ar-CN}$ ), 134.7 ( $\text{CH}$ ), 138.7 (C), 156.5 ( $\text{Ar-CO}$ ), 167.4 (C(O));

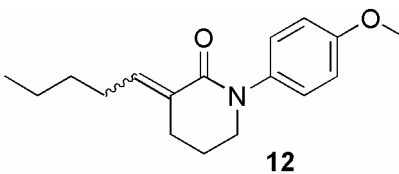

***E/Z* 1-(4-Methoxy-phenyl)-3-pentylidene-piperidin-2-one 12**

As for general procedure C, KHMDS (0.5 M in toluene, 2.17 ml, 1.09 mmol, 1.2 eq) was added to a solution of 18-crown-6 (1.19 g, 4.53 mmol, 5 eq) and [1-(4-methoxy-phenyl)-2-oxo-piperidin-3-yl]-phosphonic acid diethyl ester **6f** (0.31 g, 0.91 mmol, 1 eq) in THF (50 ml), followed by addition of valeraldehyde (0.14 ml, 1.36 mmol, 1.5 eq) in THF (10 ml) to give after work-up and purification by flash column chromatography on silica gel eluting with 40% EtOAc in petroleum ether (40-60) gave (*Z*)-1-(4-methoxy-phenyl)-3-pentylidene-piperidin-2-one **12** (157 mg, 0.58 mmol, 63%) as a yellow oil;  $\nu_{\max}$  (neat)/cm<sup>-1</sup> 3429 (OH), 2955, 1724, 1660 (C(O)), 1606, 1511, 1452, 1426, 1376, 1295, 1246, 1188, 1123, 1035, 827 and 757;  $m/z$  (CI mode) 274 (*M* + H, 100), 244 (50) and 215 (10);  $\delta_{\text{H}}$  (400 MHz, CDCl<sub>3</sub>) 0.84 (3H, m, CH<sub>3</sub>), 1.29 (4H, m, 2H from CH<sub>2</sub>CH<sub>3</sub> and CH<sub>2</sub>CH<sub>2</sub>CH<sub>3</sub>), 1.92 (2H, m, CH<sub>2</sub>CH<sub>2</sub>N), 2.50 (2H, m, CCH<sub>2</sub>), 2.58 (2H, q, *J* 7.2 Hz, CH<sub>2</sub>CH), 3.54 (2H, m, NCH<sub>2</sub>), 3.73 (3H, s, OCH<sub>3</sub>), 5.76 (1H, m, CH), 6.84 (2H, m, 2 × Ar-CH), 7.11 (2H, m, 2 × Ar-CH);  $\delta_{\text{C}}$  (75 MHz, CDCl<sub>3</sub>) 14.2 (CH<sub>3</sub>), 22.6 (CH<sub>2</sub>), 24.1 (CH<sub>2</sub>), 29.3 (CH<sub>2</sub>), 31.9 (CH<sub>2</sub>), 32.4 (CH<sub>2</sub>), 51.9 (NCH<sub>2</sub>), 55.5 (OCH<sub>3</sub>), 114.4 (2 × Ar-CH), 127.6 (2 × Ar-CH), 128.3 (Ar-CN), 136.4 (C), 143.1 (CH), 158.0 (Ar-CO), 165.7 (C(O));  $m/z$  (EI mode) 273 (*M*, 80), 244 (100), 216 (10) and 135 (10). (Found: (*M* + H), 274.1808. C<sub>17</sub>H<sub>24</sub>O<sub>2</sub>N requires *M* + H, 274.1802).

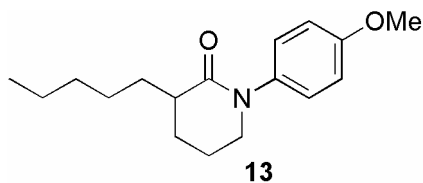

### 1-(4-Methoxyphenyl)-3-pentylpiperidin-2-one **13**

As for general procedure E, treatment of *E/Z* 1-(4-Methoxy-phenyl)-3-pentylidene-piperidin-2-one **12** (90 mg, 0.33 mmol, 1 eq) with SmI<sub>2</sub> (0.1 M in THF, 13.2. ml, 1.32 mmol, 4 eq) and MeOH (0.40 ml, 9.87 mmol, 30 eq), followed by purification by flash column chromatography on silica gel eluting with 60% EtOAc in petroleum ether (40-60) gave 1-(4-Methoxyphenyl)-3-pentylpiperidin-2-one **13** (77 mg, 0.28 mmol, 85%) as a clear oil;  $\nu_{\max}$  (neat)/cm<sup>-1</sup> 3453, 2935, 1731 (C(O)), 1495, 1454, 1370, 1275, 1161, 1100,

1028, 913, 737 and 698;  $\delta_{\text{H}}$  (500 MHz,  $\text{CDCl}_3$ ) 0.81 (3H, t,  $J$  6.9 Hz,  $\text{CH}_3$ ), 1.28 (5H, m, 2H from  $\text{CH}_2\text{CH}_3$ , 1H from CH, 2H from  $\text{CH}_2$ ), 1.52 (3H, m, 1H from  $\text{CH}_2$  and 2H from  $\text{CH}_2$ ), 1.90 (4H, m, 2H from  $\text{CH}_2\text{CH}_2\text{N}$  and 2H from  $\text{CH}_2$ ), 2.35 (1H, m, 1H from  $\text{CH}_2$ ), 3.52 (2H, m,  $\text{NCH}_2$ ), 3.74 (3H, s,  $\text{OCH}_3$ ), 6.82 (2H, d,  $J$  8.8 Hz,  $2 \times \text{Ar-CH}$ ), 7.06 (2H, d,  $J$  9.0 Hz,  $2 \times \text{Ar-CH}$ );  $\delta_{\text{C}}$  (100 MHz,  $\text{CDCl}_3$ ) 14.1 ( $\text{CH}_3$ ), 22.2 ( $\text{CH}_2$ ), 22.6 ( $\text{CH}_2$ ), 26.5 ( $\text{CH}_2$ ), 26.8 ( $\text{CH}_2$ ), 31.9 ( $\text{CH}_2$ ), 31.9 ( $\text{CH}_2$ ), 41.9 (CH), 51.9 ( $\text{NCH}_2$ ), 55.5 ( $\text{OCH}_3$ ), 114.3 ( $2 \times \text{Ar-CH}$ ), 127.4 ( $2 \times \text{Ar-CH}$ ), 136.6 (Ar-C), 157.9 (Ar-CO), 173.2 ( $\text{C(O)}$ );  $m/z$  (CI mode) 276 ( $M + \text{H}$ , 100) and 204 (20).  $m/z$  (EI mode) 275 ( $M$ , 10), 204 (100), 136 (15), 83 (15) and 55 (10). (Found: ( $M$ ), 275.1870.  $\text{C}_{17}\text{H}_{25}\text{O}_2\text{N}$  requires  $M$ , 275.1880).

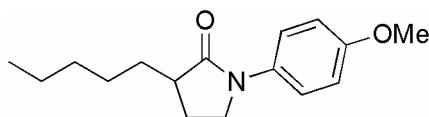

### 1-(4-Methoxy-phenyl)-3-pentyl-pyrrolidin-2-one

As for general procedure E, treatment of *E/Z* 1-(4-Methoxy-phenyl)-3-pentylidene-pyrrolidin-2-one **11** (40 mg, 0.16 mmol, 1 eq) with  $\text{SmI}_2$  (0.1 M in THF, 6.20. ml, 0.62 mmol, 4 eq) and MeOH (0.19 ml, 4.65 mmol, 30 eq), followed by purification by flash column chromatography on silica gel eluting with 60% EtOAc in petroleum ether (40-60) gave 1-(4-Methoxy-phenyl)-3-pentyl-pyrrolidin-2-one (32 mg, 0.13 mmol, 80%) as a yellow oil;  $\nu_{\text{max}}$  (neat)/ $\text{cm}^{-1}$  3435, 2923, 1678 ( $\text{C(O)}$ ), 1513, 1465, 1398, 1322, 1288, 1249, 1225, 1180, 1120, 1100, 1032, 825, 755 and 665;  $\delta_{\text{H}}$  (300 MHz,  $\text{CDCl}_3$ ) 0.82 (3H, m,  $\text{CH}_3$ ), 1.31 (7H, m, 2H from  $\text{CH}_2\text{CH}_3$ , 2H from  $2 \times \text{CH}_2$  and 1H from  $\text{CH}_2$ ), 1.72 (1H, m, 1H from  $\text{CH}_2\text{CH}_2\text{N}$ ), 1.88 (1H, m, 1H from  $\text{CH}_2$ ), 2.25 (1H, m, 1H from  $\text{CH}_2\text{CH}_2\text{N}$ ), 2.49 (1H, m, CH), 3.67 (2H, m,  $\text{NCH}_2$ ), 3.73 (3H, s,  $\text{OCH}_3$ ), 6.83 (2H, d,  $J$  9.0 Hz,  $2 \times \text{Ar-CH}$ ), 7.45 (2H, d,  $J$  9.0 Hz,  $2 \times \text{Ar-CH}$ );  $\delta_{\text{C}}$  (75 MHz,  $\text{CDCl}_3$ ) 14.1 ( $\text{CH}_3$ ), 22.6 ( $\text{CH}_2$ ), 24.9 ( $\text{CH}_2$ ), 26.9 ( $\text{CH}_2$ ), 31.3 ( $\text{CH}_2$ ), 31.8 ( $\text{CH}_2$ ), 43.3 (CH), 47.2 ( $\text{NCH}_2$ ), 55.5 ( $\text{OCH}_3$ ), 114.0 ( $2 \times \text{Ar-CH}$ ), 121.4 ( $2 \times \text{Ar-CH}$ ), 132.9 (Ar-CN), 156.4 (Ar-CO), 175.8 ( $\text{C(O)}$ ),  $m/z$  (CI mode) 261 ( $M$ , 100), 203 (20), 190 (70), 135 (20) and 82 (40).  $m/z$  (EI mode) 261 ( $M$ , 90), 204 (30), 191 (100), 136 (20) and 83 (20). (Found: ( $M$ ), 261.1722.  $\text{C}_{16}\text{H}_{23}\text{O}_2\text{N}$  requires  $M$ , 261.1729).

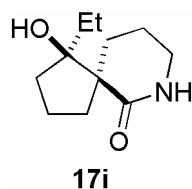

***rac*-(1*R*, 5*S*)-1-Ethyl-1-hydroxy-7-aza-spiro[4,5]decan-6-one **17i****

To a solution of *rac*-(1*R*, 5*R*)-1-ethyl-1-hydroxy-7-(4-methoxy-phenyl)-7-aza-spiro[4,5]decan-6-one **9i** (50 mg, 0.17 mmol, 1 eq) in CH<sub>3</sub>CN (90 ml) and H<sub>2</sub>O (10 ml), was added NaClO<sub>4</sub> (21 mg, 1.65 mmol, 10 eq). The electrolysis was carried out at room temperature in a divided glass cell equipped with two platinum electrodes. The potential was maintained at a constant value of 1.7 V for 37 hours. The two compartments of the glass cell were separated by a porous glass disk. The working electrode was a Pt plate (2 cm<sup>2</sup>). The reference electrode was a Ag/AgCl electrode to which the potential is referred. These two electrodes were placed in the anodic compartment of the cell. The counter electrode was a Pt grid and was placed in the cathodic compartment filled with the same solution. The potentiostat galvanostat was included in the circuit. The organic solution was then concentrated *in vacuo* and the aqueous layer separated and extracted with EtOAc (3 × 50 ml). The combined organics were dried (NaSO<sub>4</sub>) and concentrated *in vacuo* to give crude product. Purification by flash column chromatography on silica gel eluting with EtOAc gave *rac*-(1*R*, 5*S*)-1-ethyl-1-hydroxy-7-aza-spiro[4,5]decan-6-one **17i** (22 mg, 0.12 mmol, 73%, 98% based on recovered starting material) as a clear oil;  $\nu_{\text{max}}$  (neat)/cm<sup>-1</sup> 3280, 2955, 1635 (C(O)), 1490, 1452, 1401, 1355, 1331, 1301, 1280, 1232, 1205, 1133, 1110, 1028, 998, 974, 954, 915, 874, 795 and 658;  $\delta_{\text{H}}$  (500 MHz, CDCl<sub>3</sub>) 0.88 (3H, t, *J* 7.5 Hz, CH<sub>3</sub>), 1.42 -1.95 (11H, 5 × CH<sub>2</sub> and 1H from CH<sub>2</sub>), 2.30 (1H, m, 1H from CH<sub>2</sub>), 3.24 (2H, m, NCH<sub>2</sub>), 6.45 (1H, s, OH), 6.60 (1H, s, NH);  $\delta_{\text{C}}$  (75 MHz, CDCl<sub>3</sub>) 19.6 (CH<sub>2</sub>), 19.9 (CH<sub>3</sub>), 27.9 (CH<sub>2</sub>), 29.3 (CH<sub>2</sub>), 35.8 (CH<sub>2</sub>), 37.1 (CH<sub>2</sub>), 42.4 (NCH<sub>2</sub>), 51.9 (C), 86.6 (COH), 179.3 (C(O)); *m/z* (CI mode) 198 (*M* + H, 100), 180 (50) and 111 (10). *m/z* (EI mode) 197 (*M*, 10), 180 (10), 112 (100) and 84 (40).



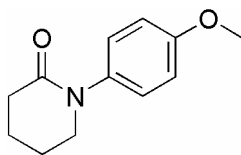

400 MHz, CDCl<sub>3</sub>

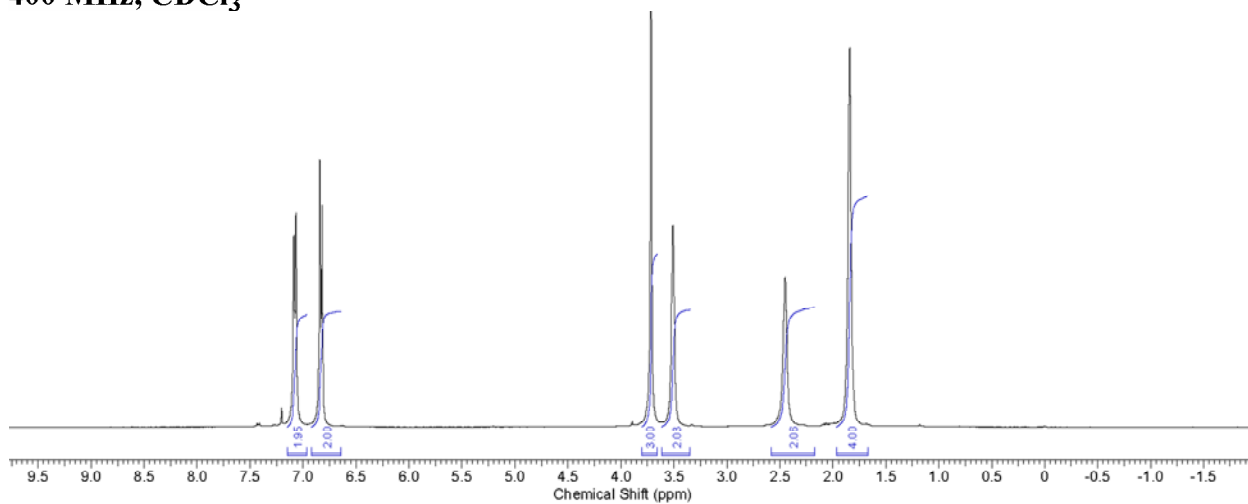

100 MHz, CDCl<sub>3</sub>

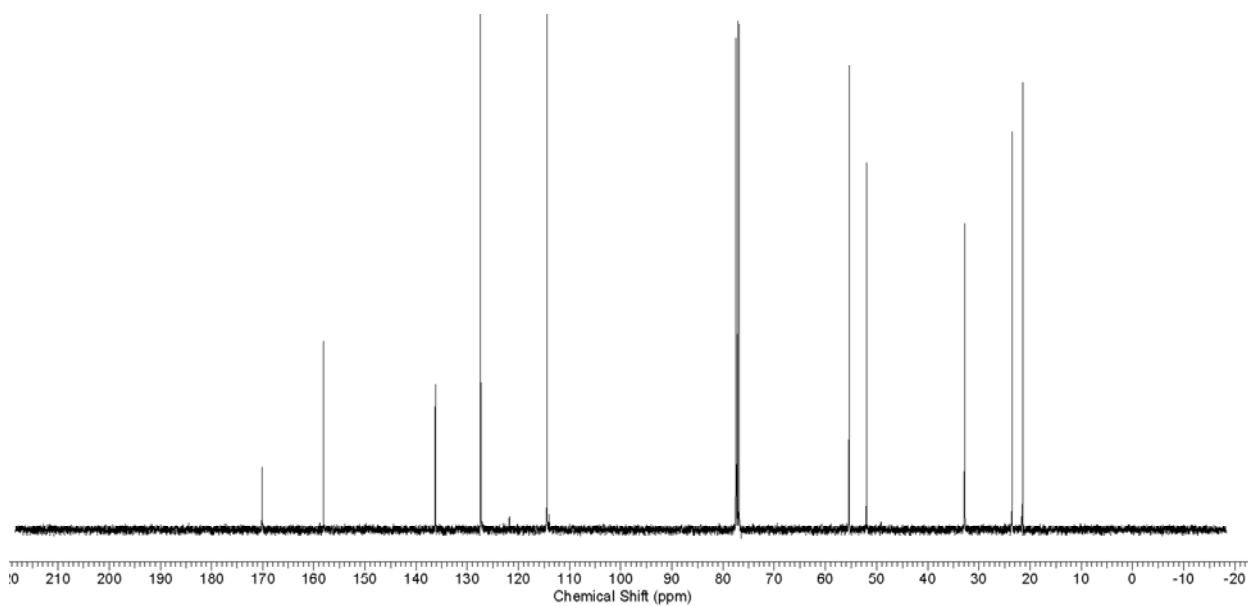

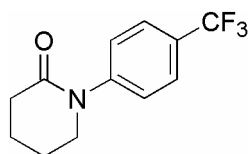

500 MHz, CDCl<sub>3</sub>

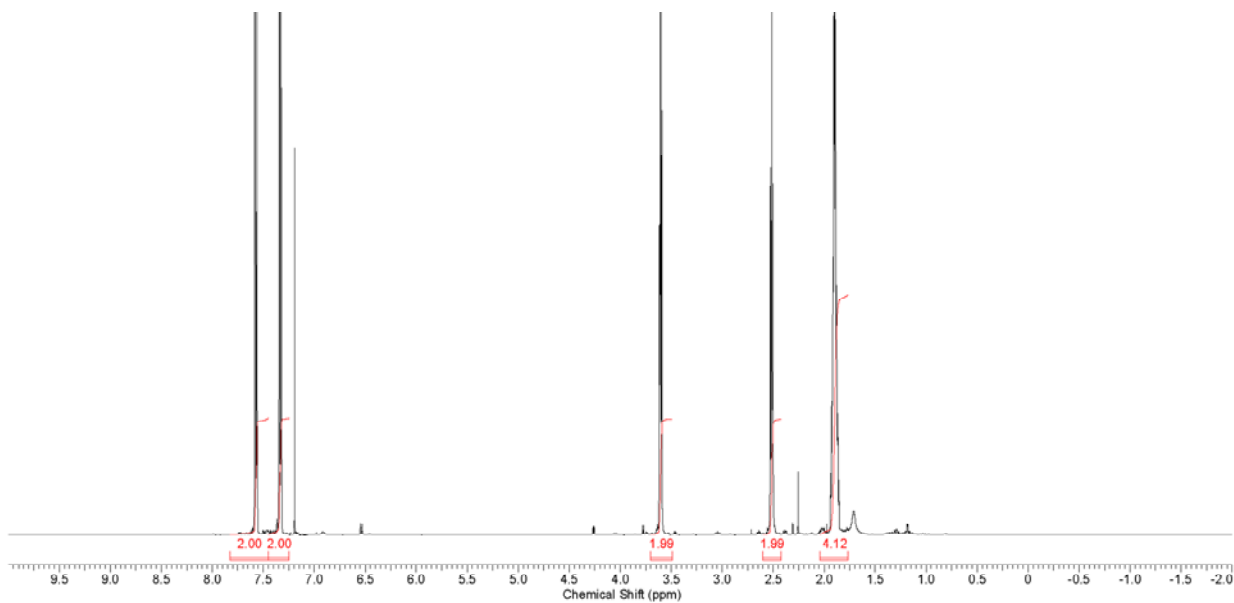

125 MHz, CDCl<sub>3</sub>

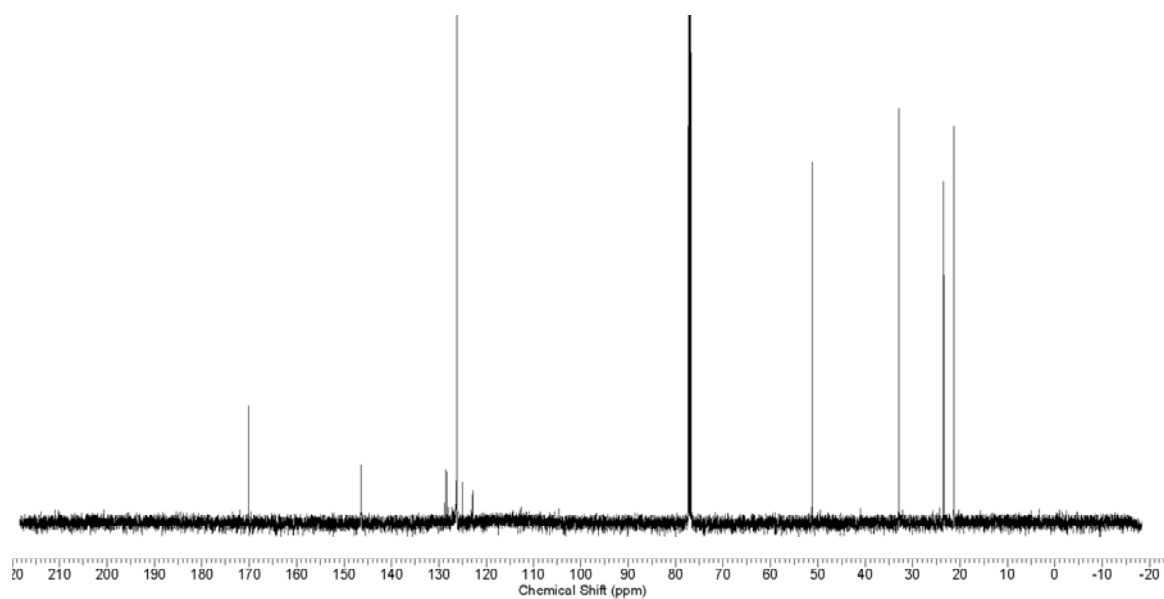

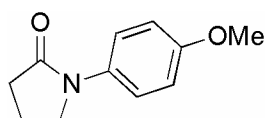

300 MHz, CDCl<sub>3</sub>

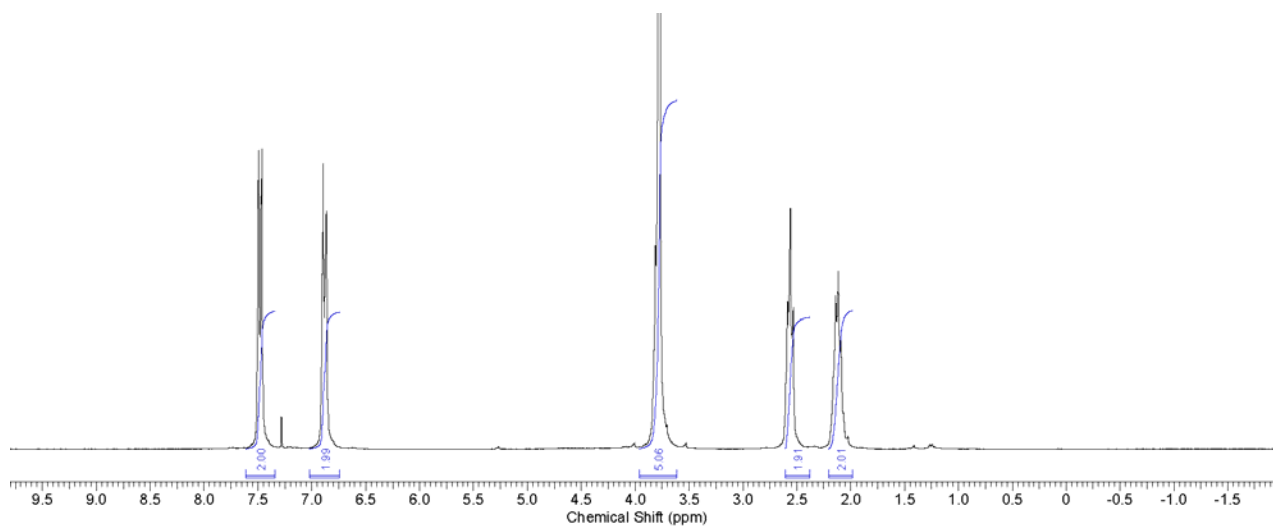

100 MHz, CDCl<sub>3</sub>

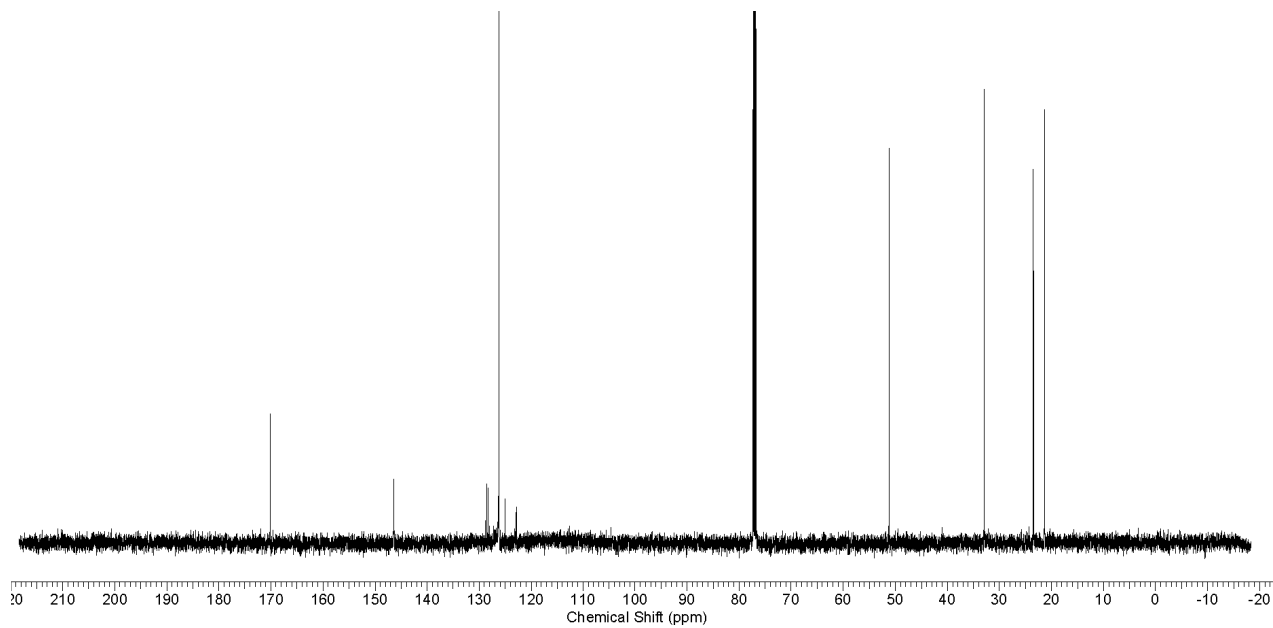

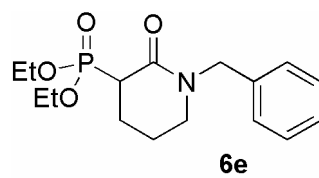

**500 MHz, CDCl<sub>3</sub>**

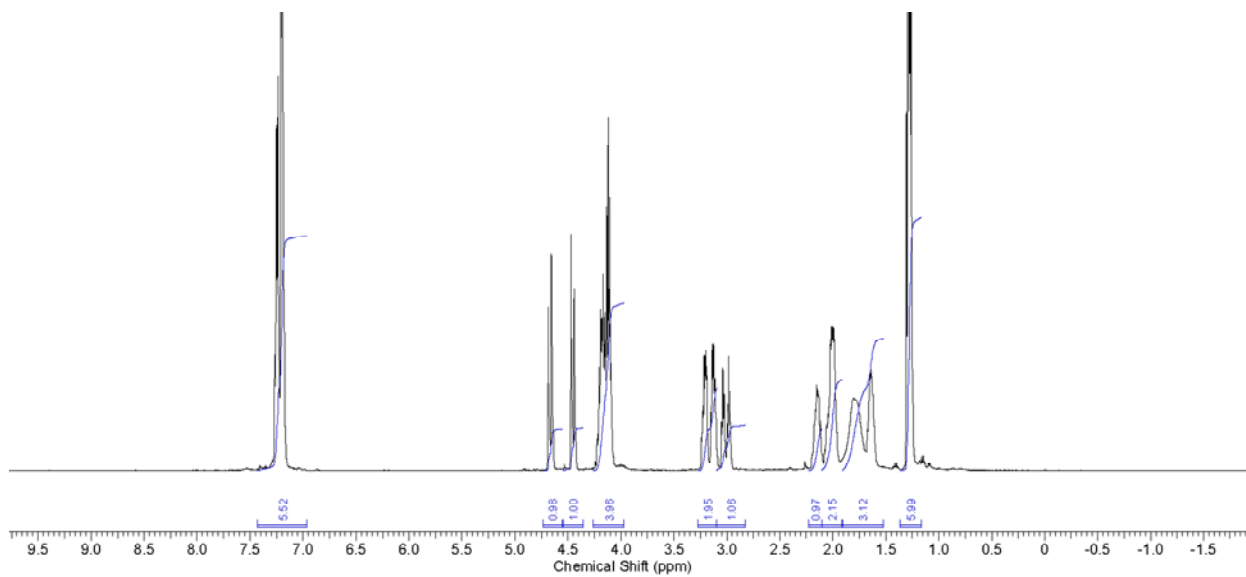

**125 MHz, CDCl<sub>3</sub>**

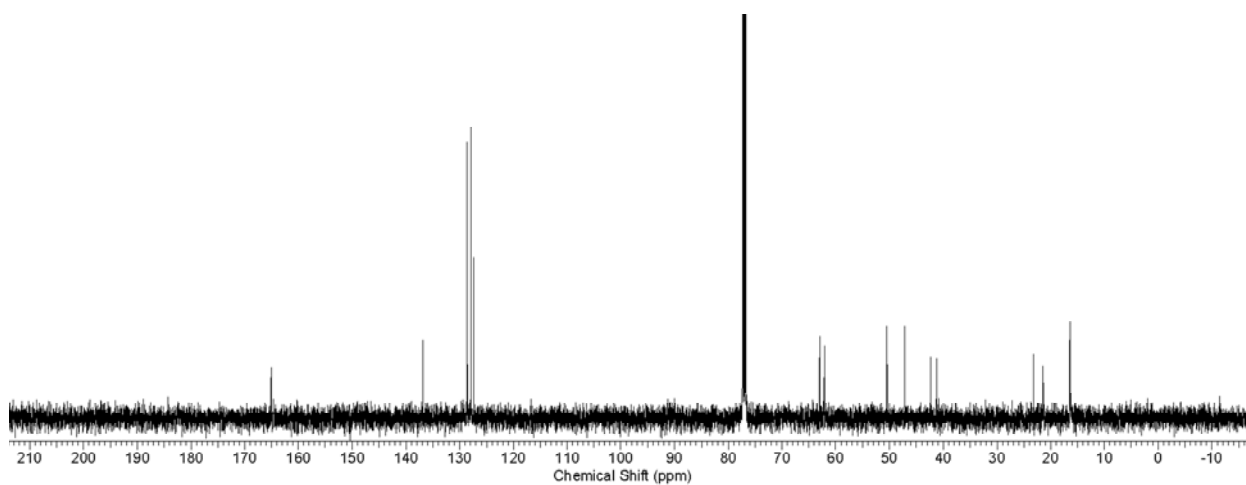

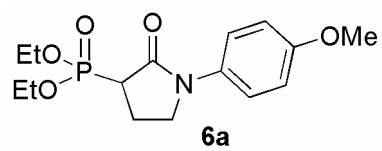

**300 MHz, CDCl<sub>3</sub>**

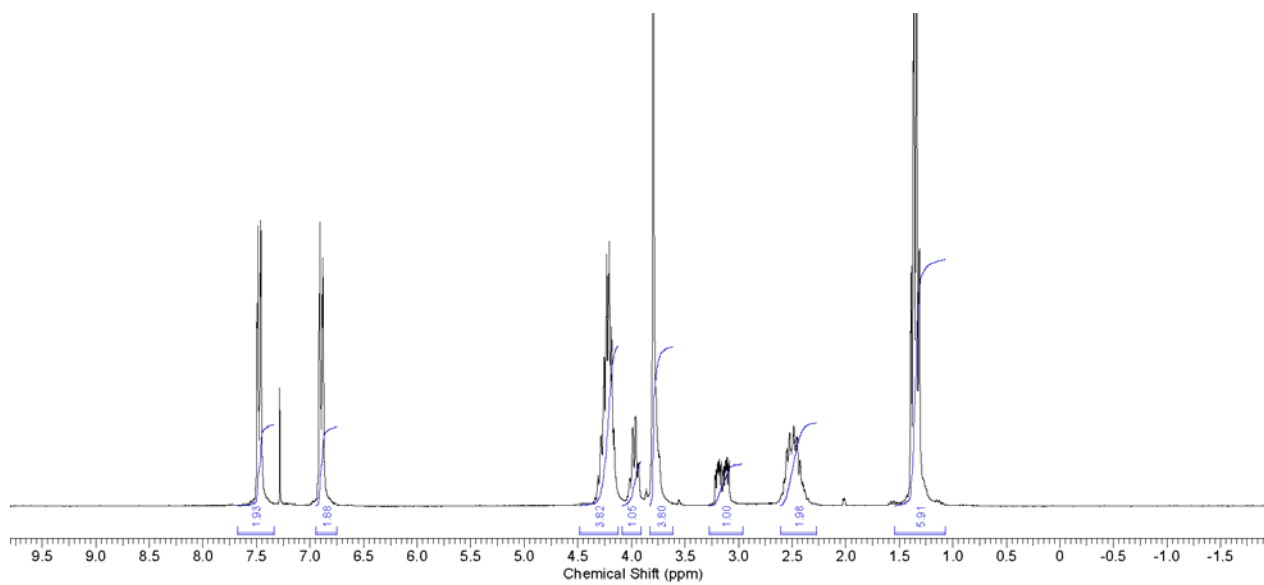

**75 MHz, CDCl<sub>3</sub>**

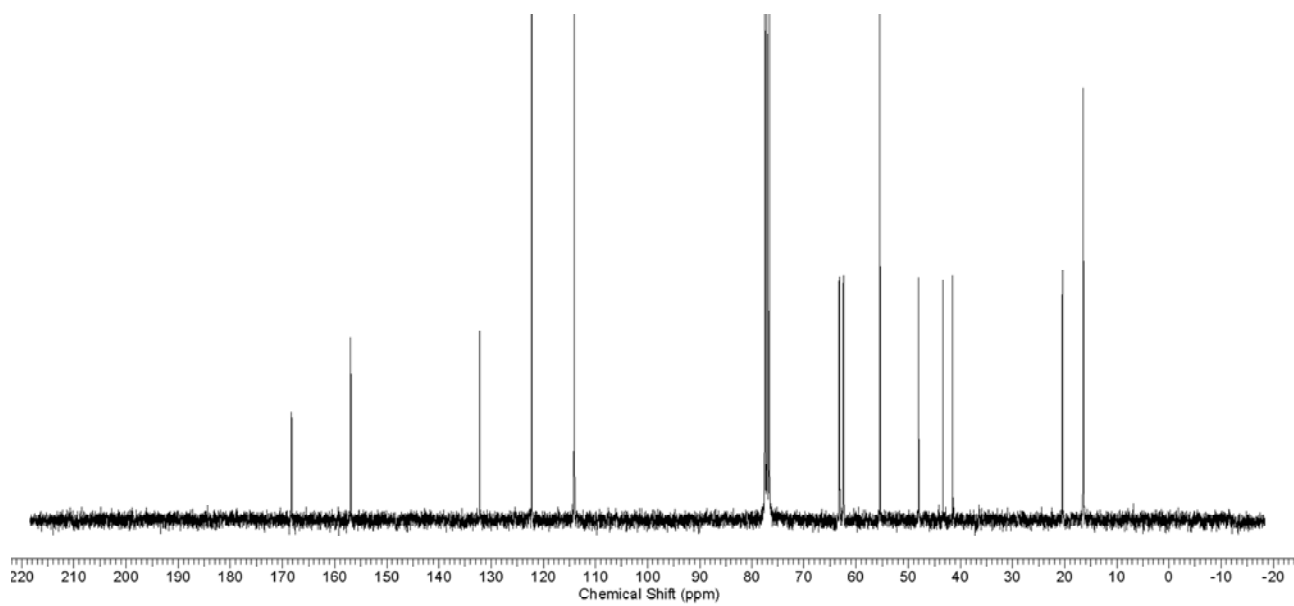

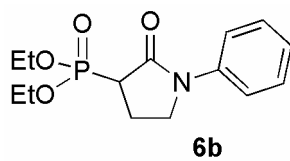

**500 MHz, CDCl<sub>3</sub>**

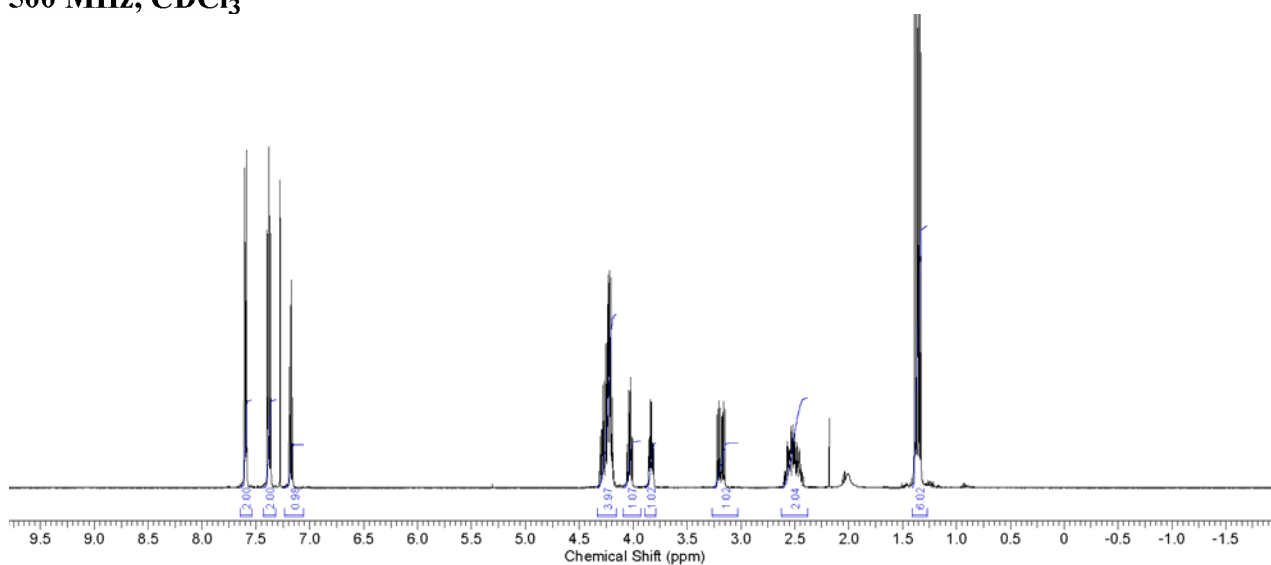

**100 MHz, CDCl<sub>3</sub>**

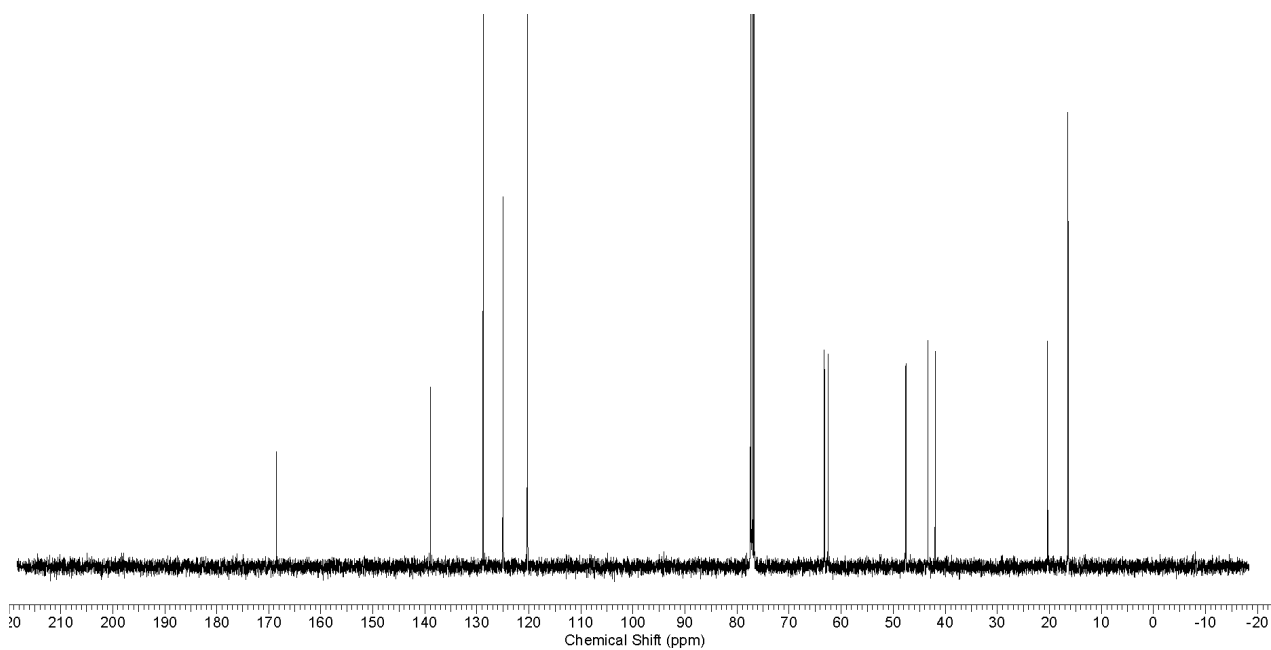

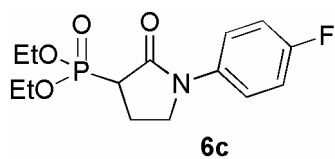

**400 MHz, CDCl<sub>3</sub>**

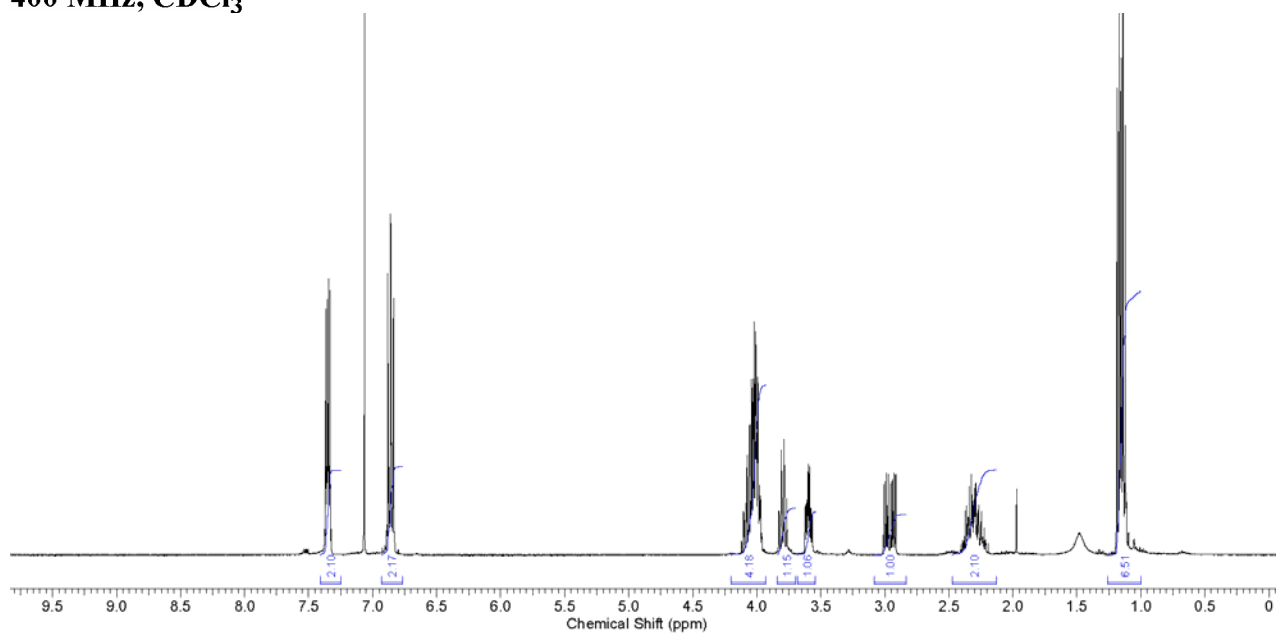

**100 MHz, CDCl<sub>3</sub>**

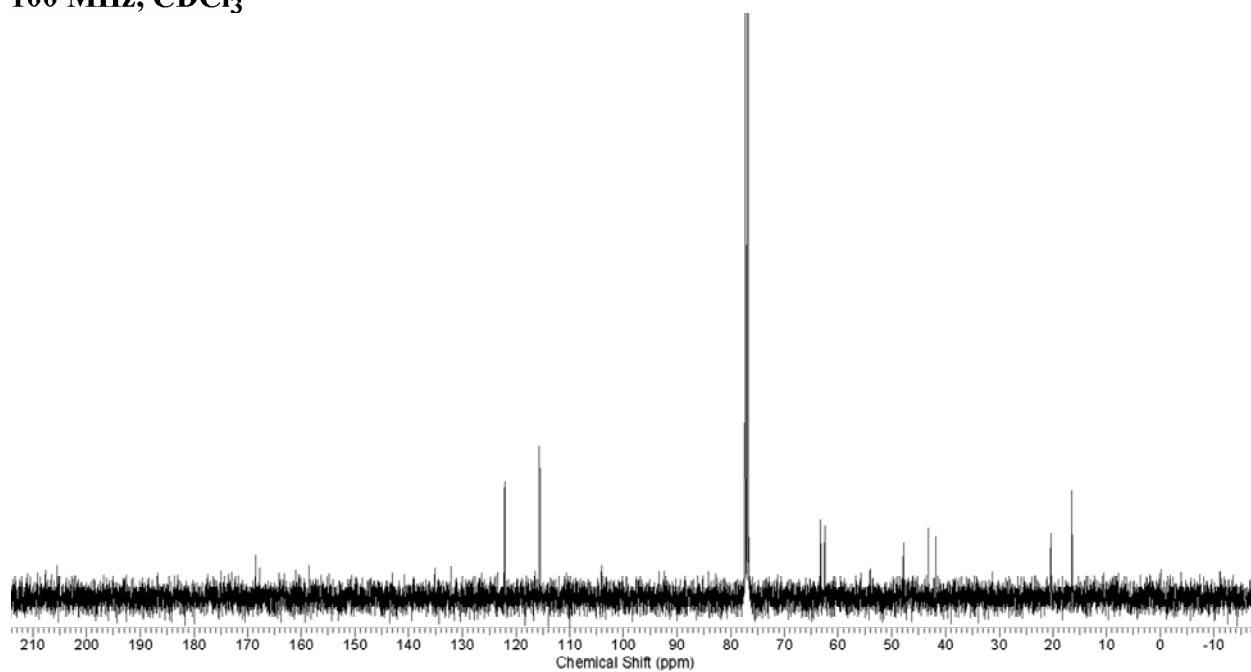

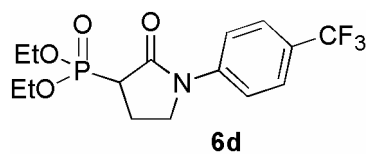

**500 MHz, CDCl<sub>3</sub>**

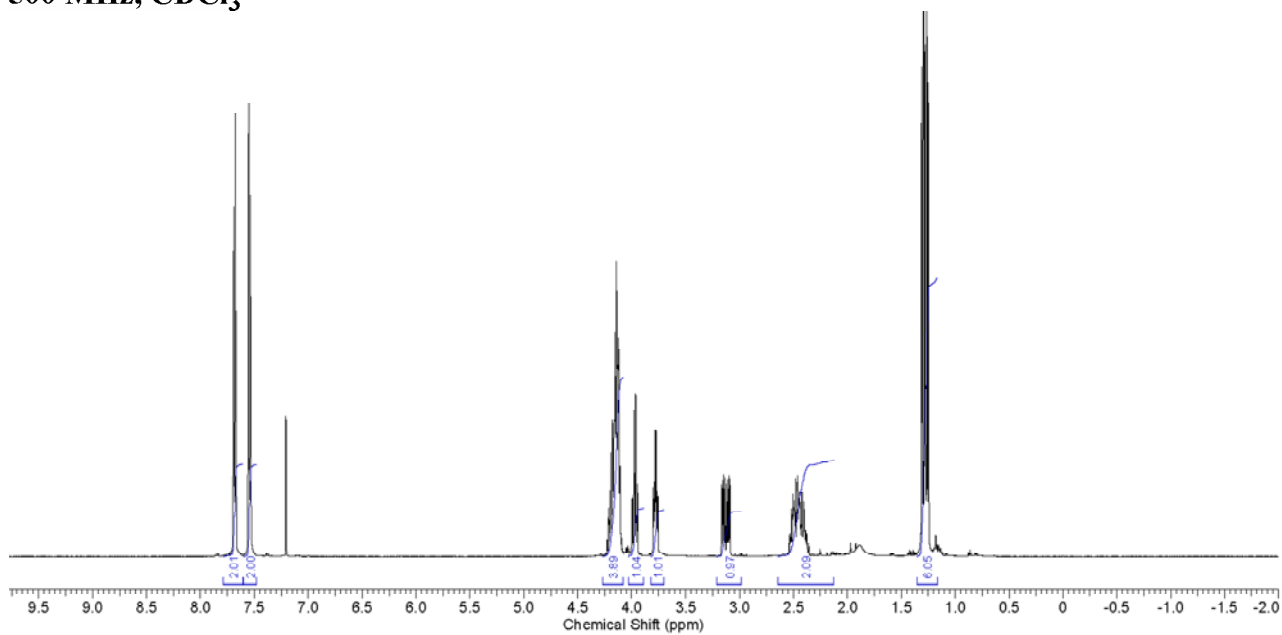

**125 MHz, CDCl<sub>3</sub>**

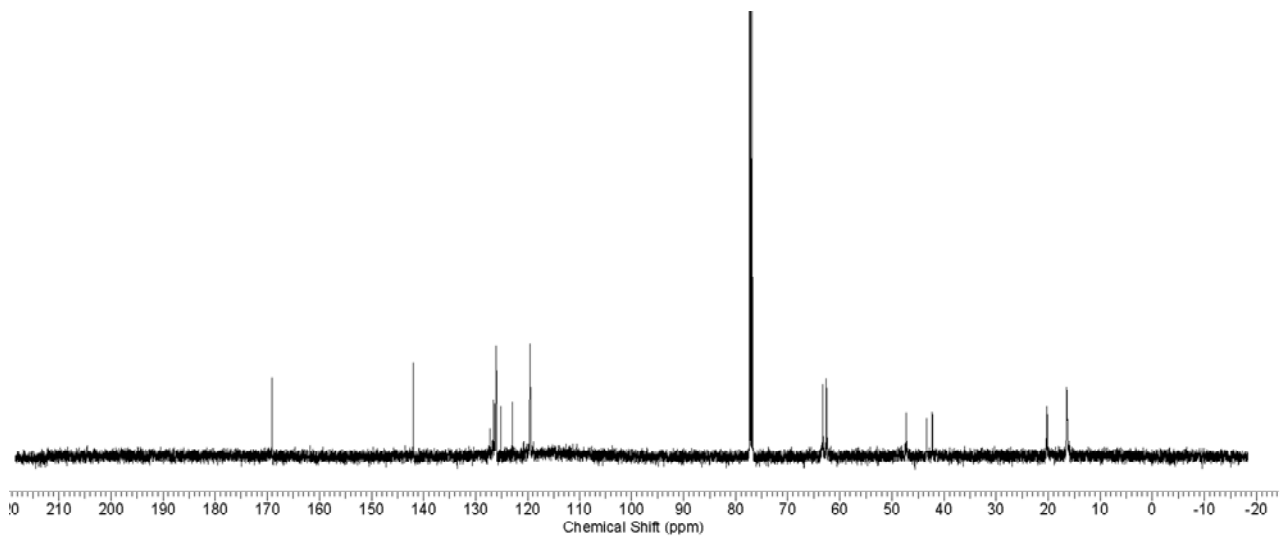



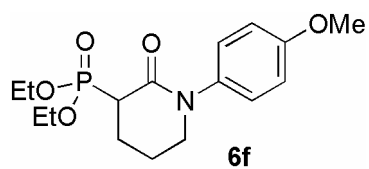

400 MHz, CDCl<sub>3</sub>

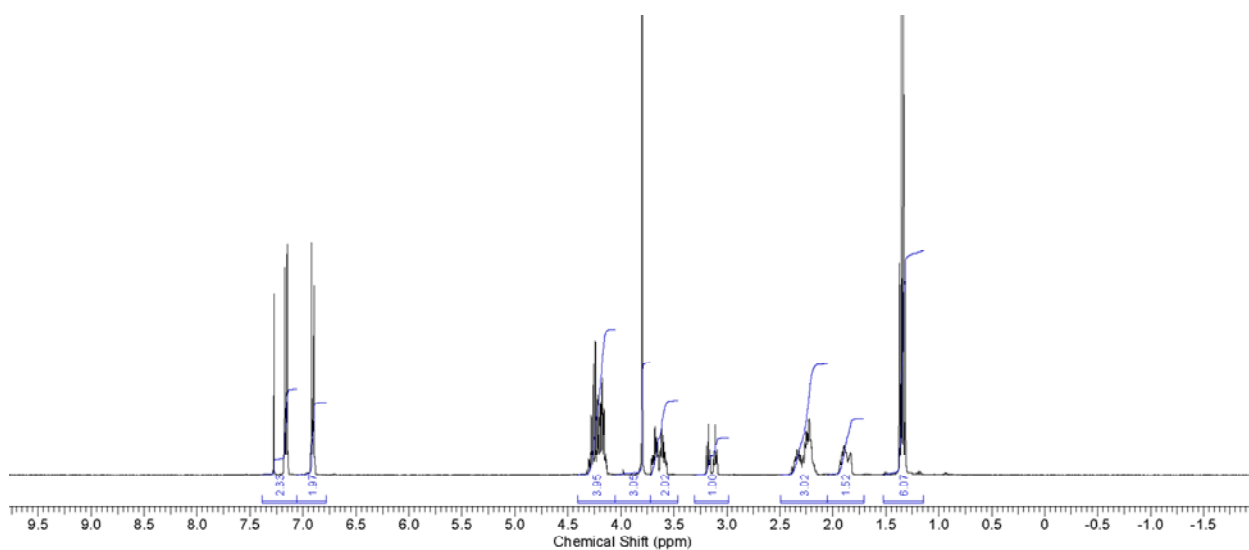

100 MHz, CDCl<sub>3</sub>

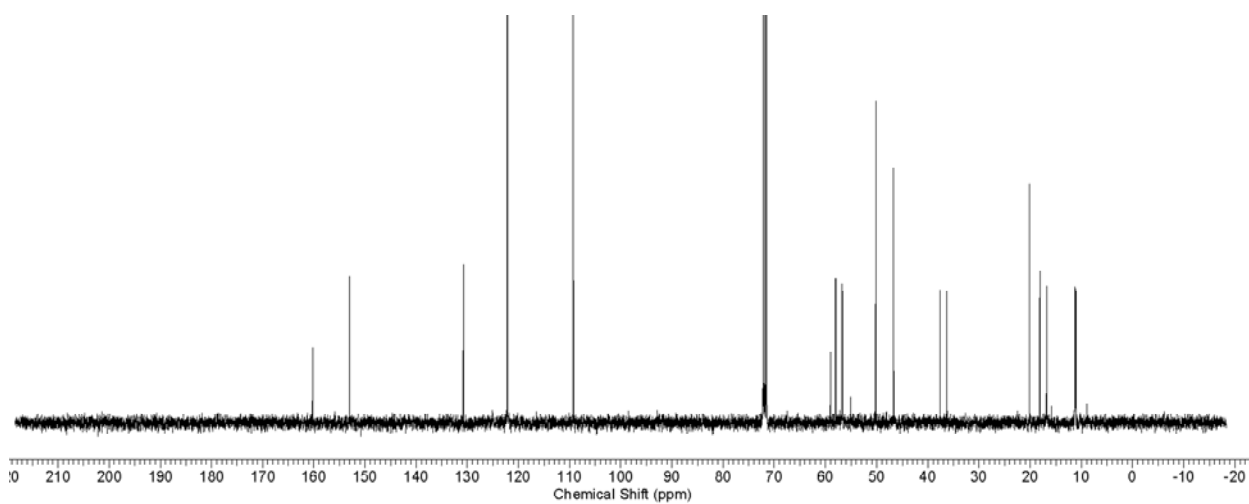

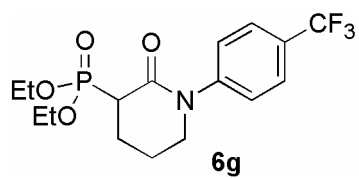

**300 MHz, CDCl<sub>3</sub>**

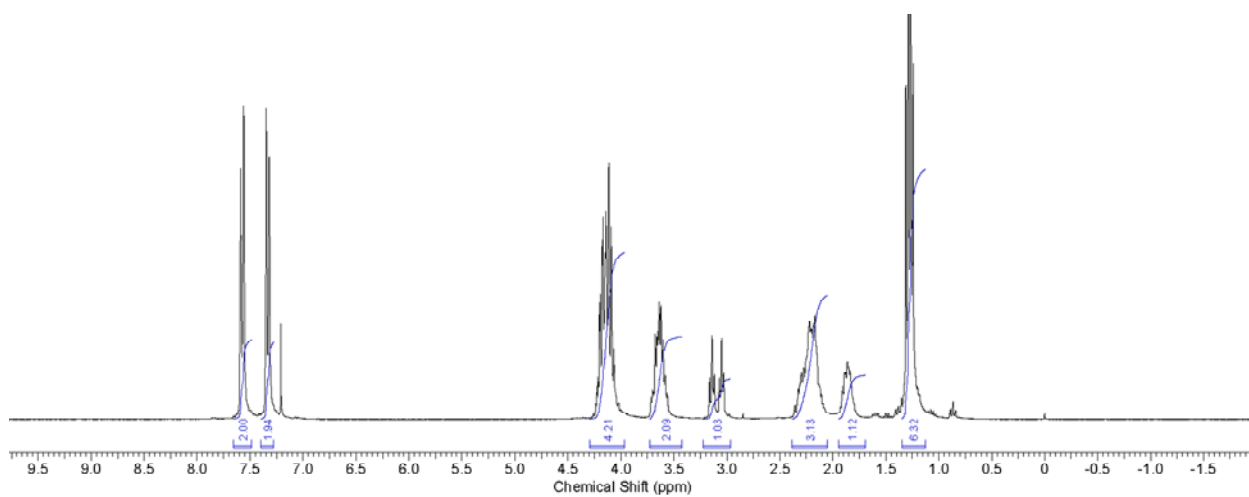

**75 MHz, CDCl<sub>3</sub>**

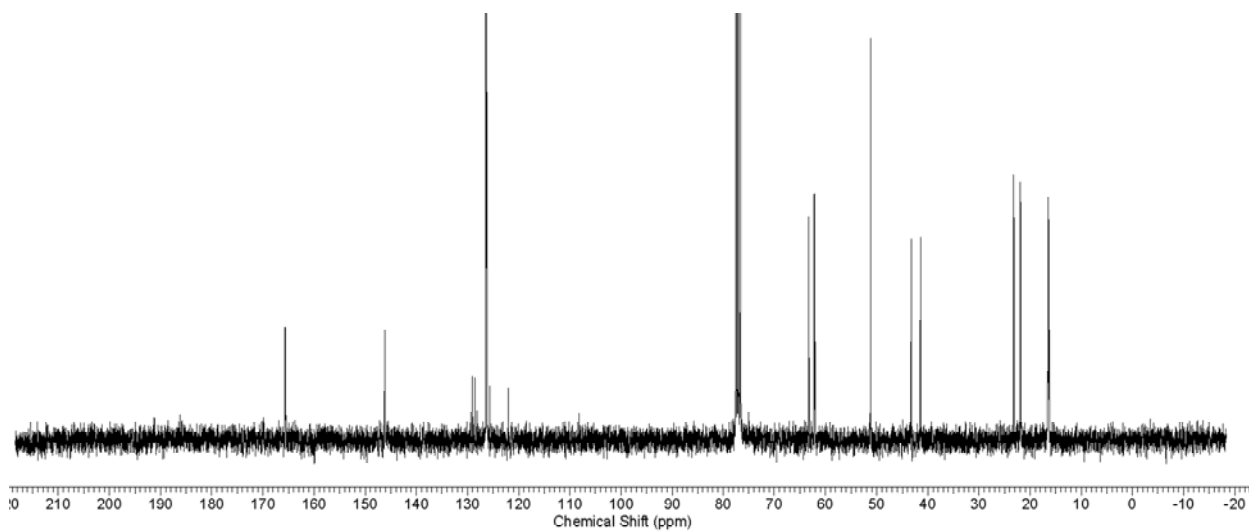

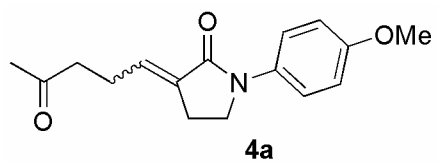

**E isomer**

**400 MHz, CDCl<sub>3</sub>**

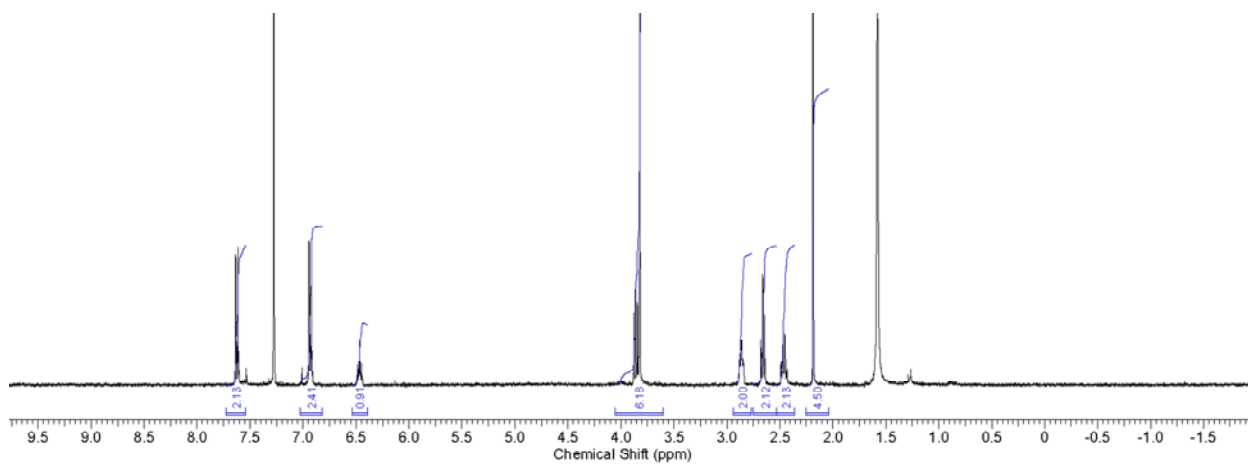

**100 MHz, CDCl<sub>3</sub>**

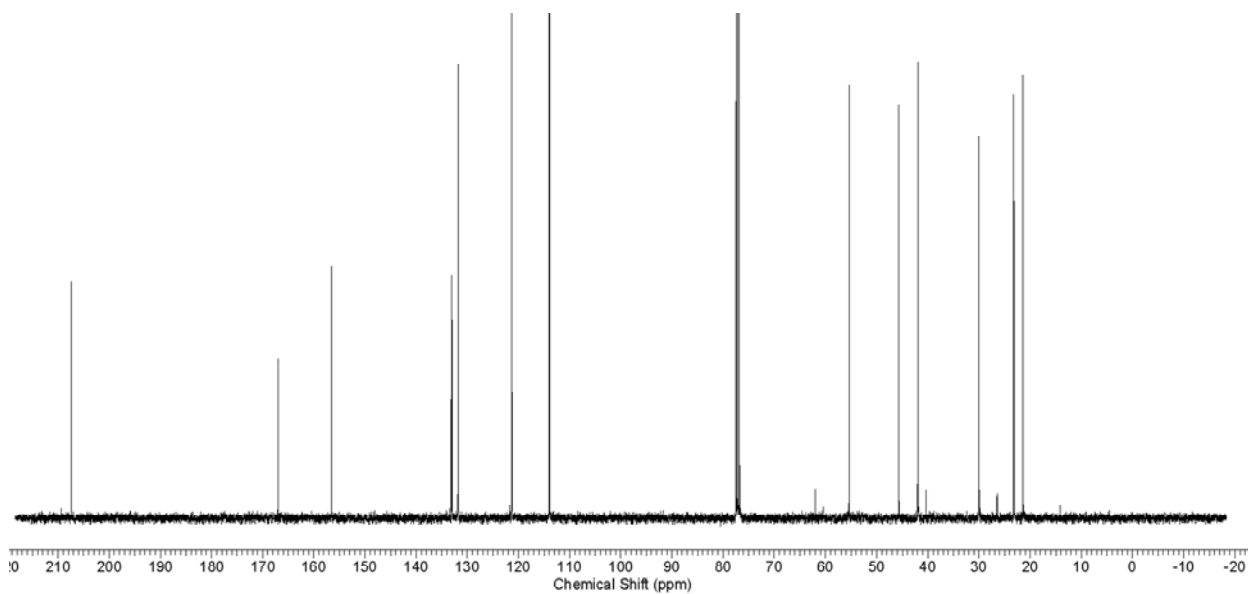

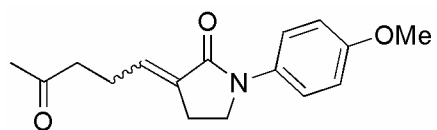

**4a**

**Z isomer**

**400 MHz, CDCl<sub>3</sub>**

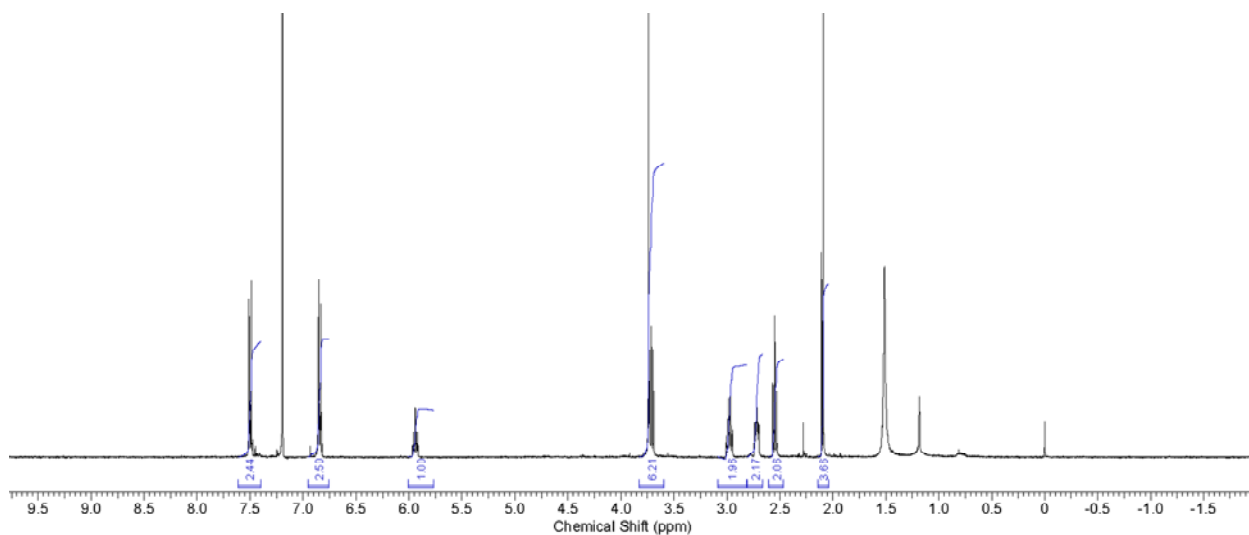

**100 MHz, CDCl<sub>3</sub>**

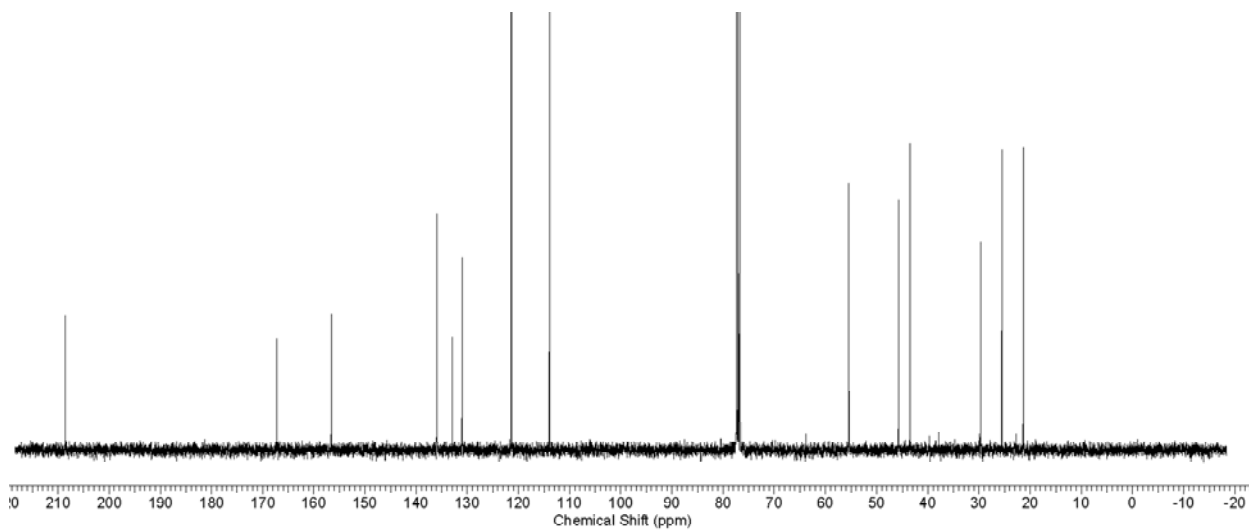

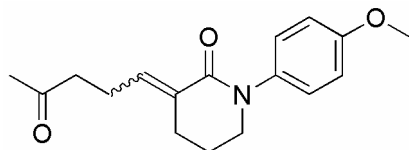

**4g**

**Z isomer**

**500 MHz, CDCl<sub>3</sub>**

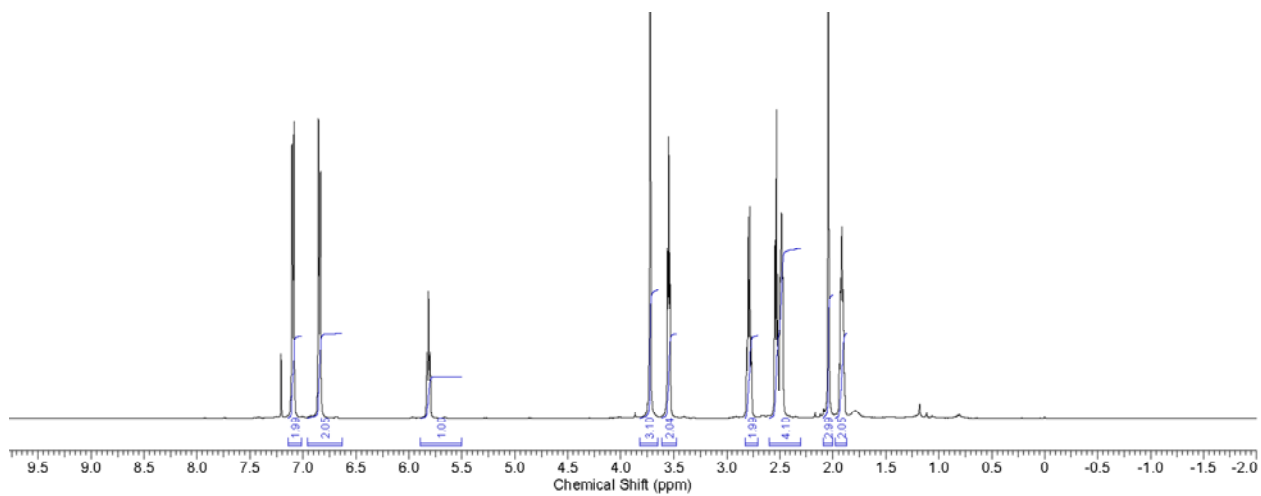

**125 MHz, CDCl<sub>3</sub>**

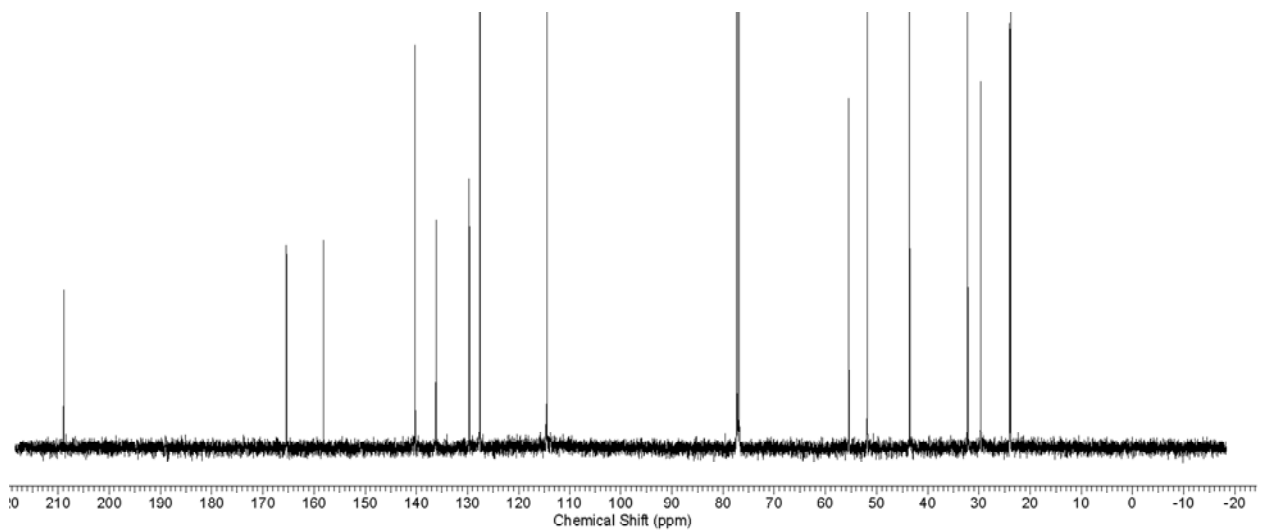

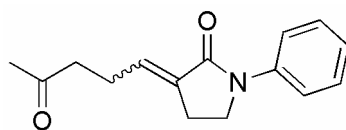

**4b**      **E isomer**

**400 MHz, CDCl<sub>3</sub>**

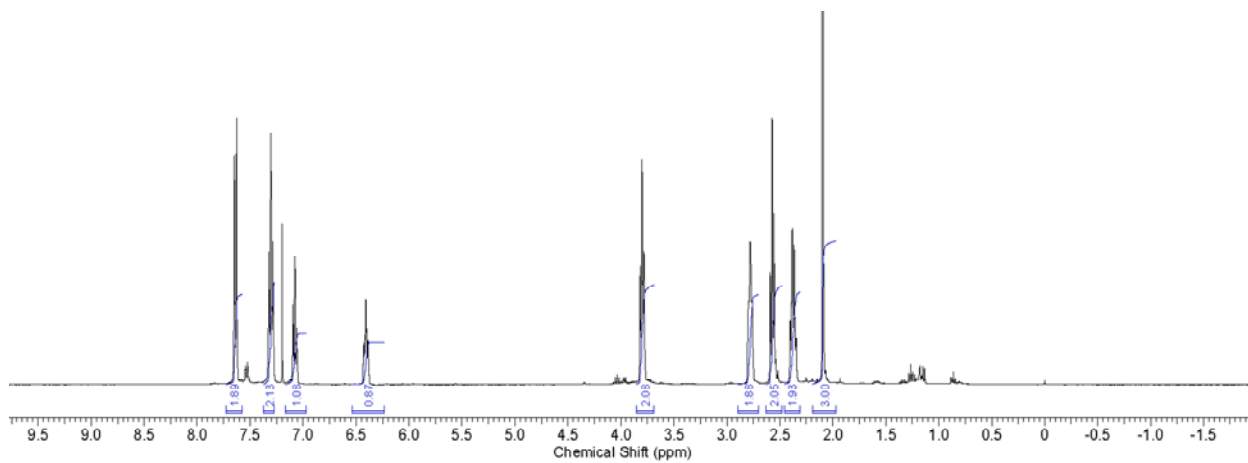

**100 MHz, CDCl<sub>3</sub>**

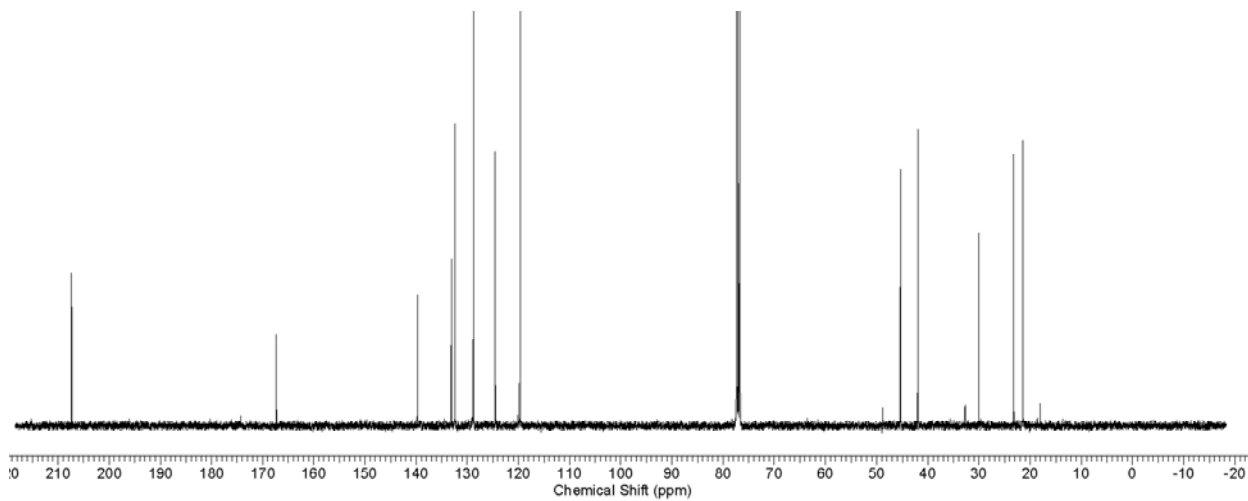



**4b**

**Z isomer**

**400 MHz, CDCl<sub>3</sub>**

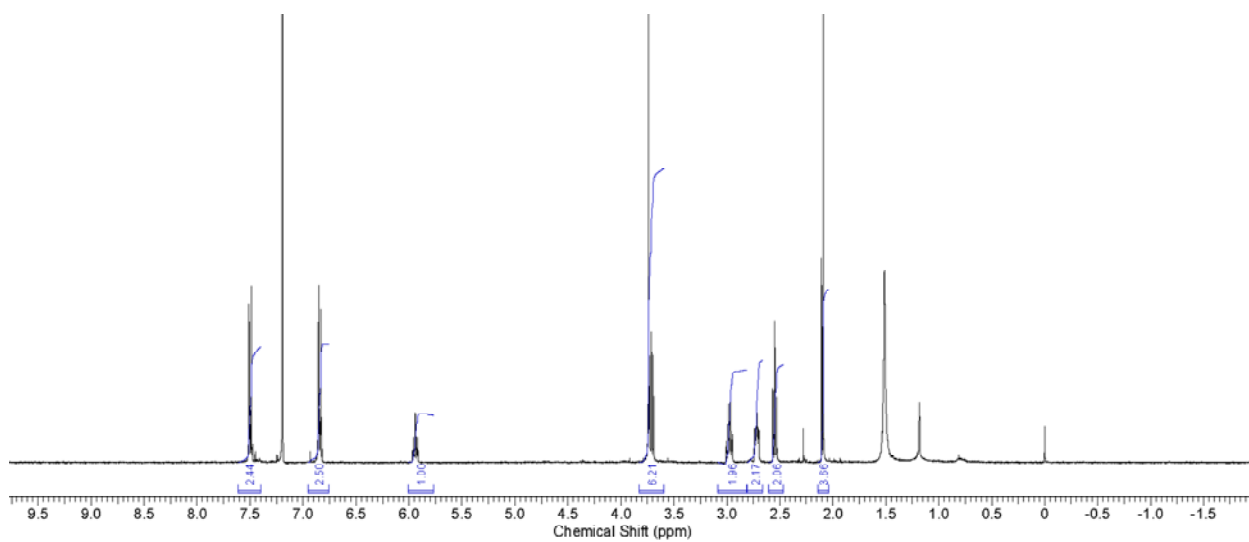

**100 MHz, CDCl<sub>3</sub>**

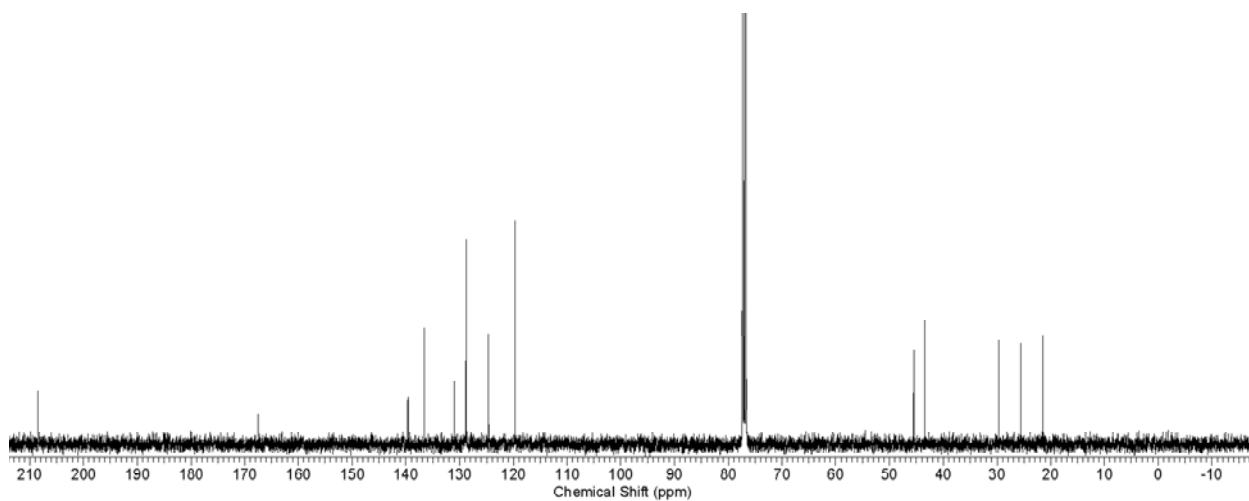

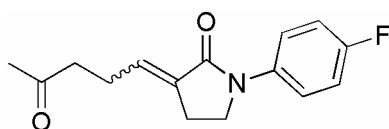

**4c**

**E isomer**

**400 MHz, CDCl<sub>3</sub>**

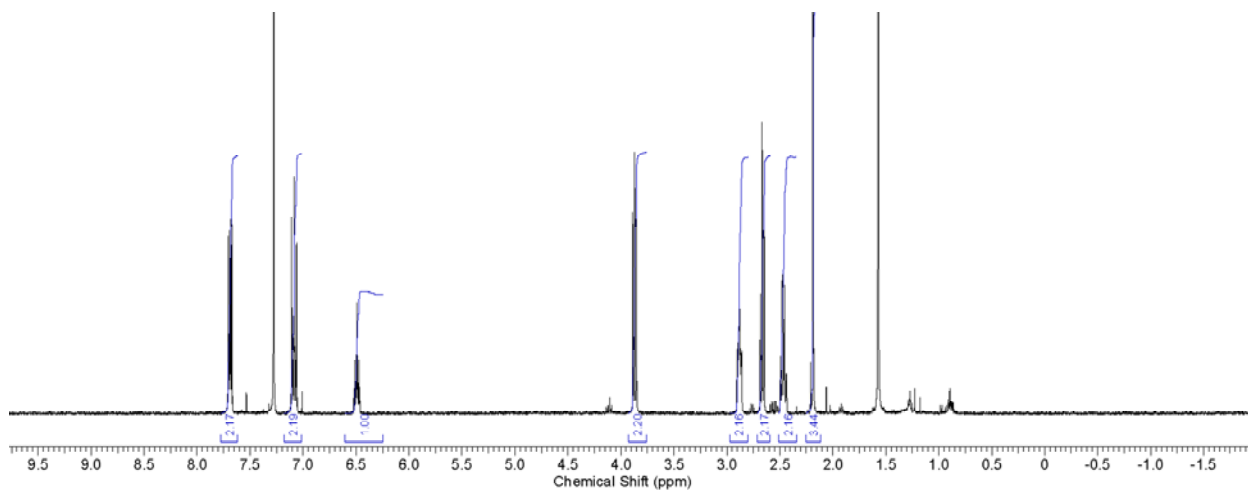

**100 MHz, CDCl<sub>3</sub>**

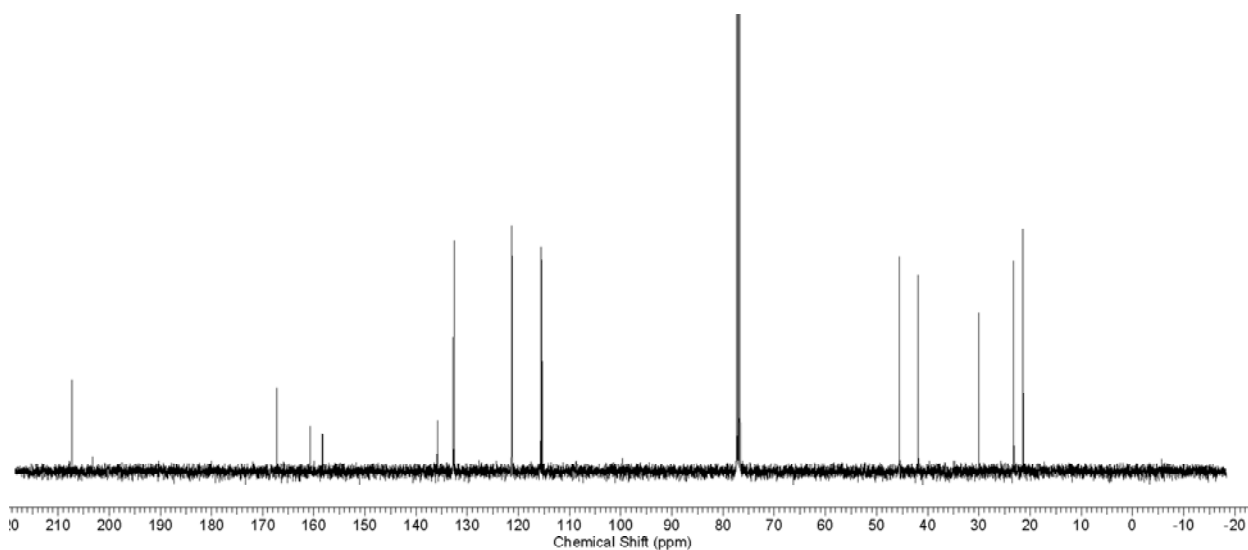



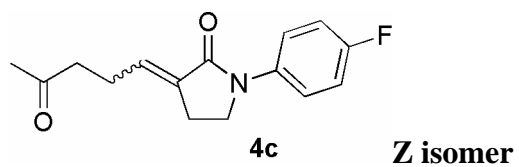

**400 MHz, CDCl<sub>3</sub>**

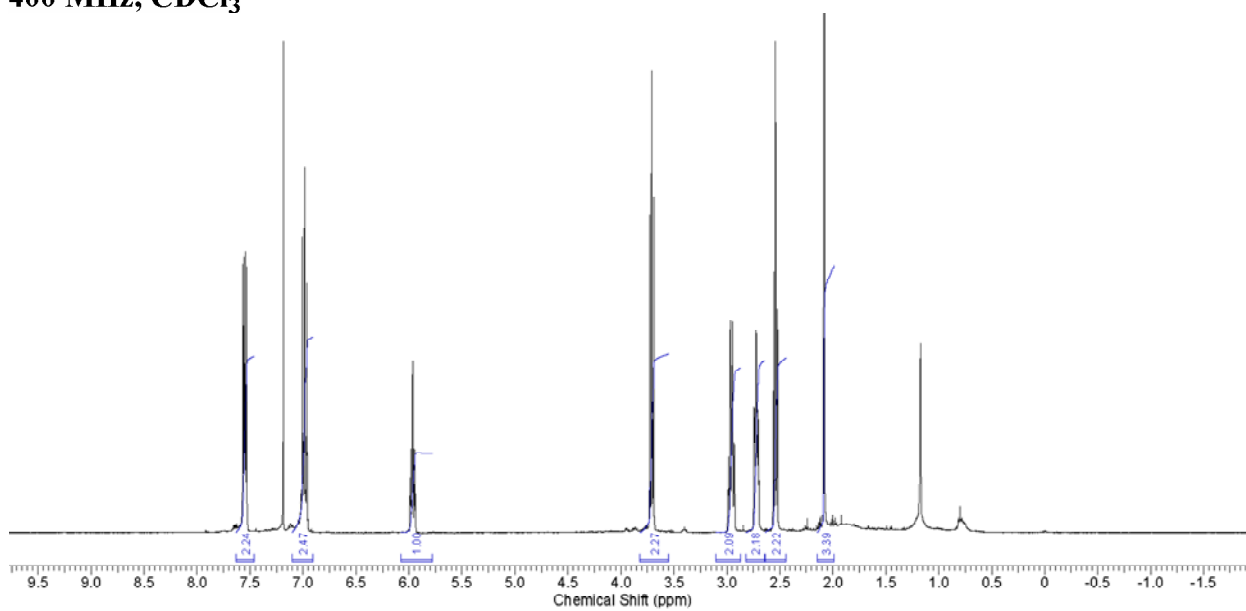

**100 MHz, CDCl<sub>3</sub>**

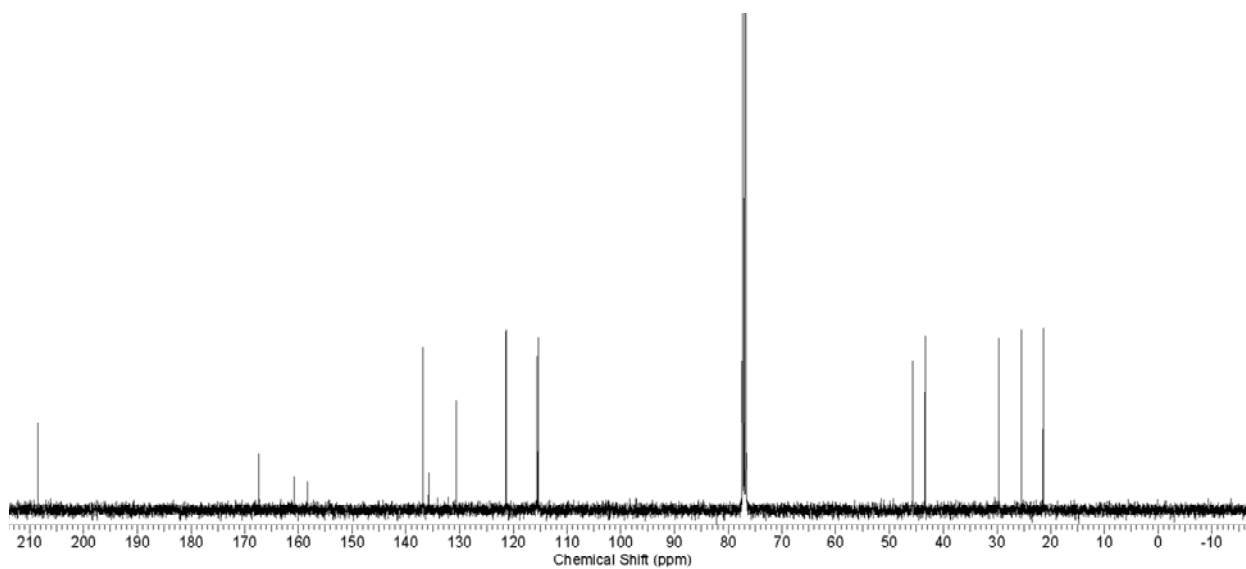

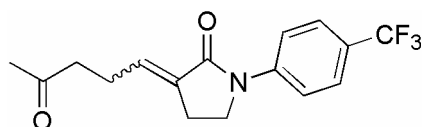

**4d**

**E isomer**

**400 MHz, CDCl<sub>3</sub>**

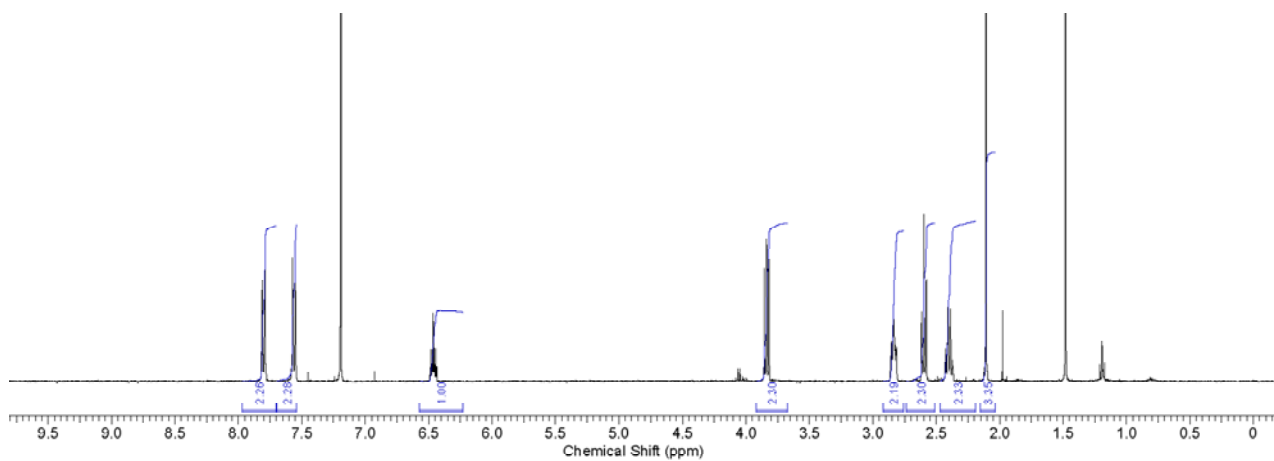

**100 MHz, CDCl<sub>3</sub>**

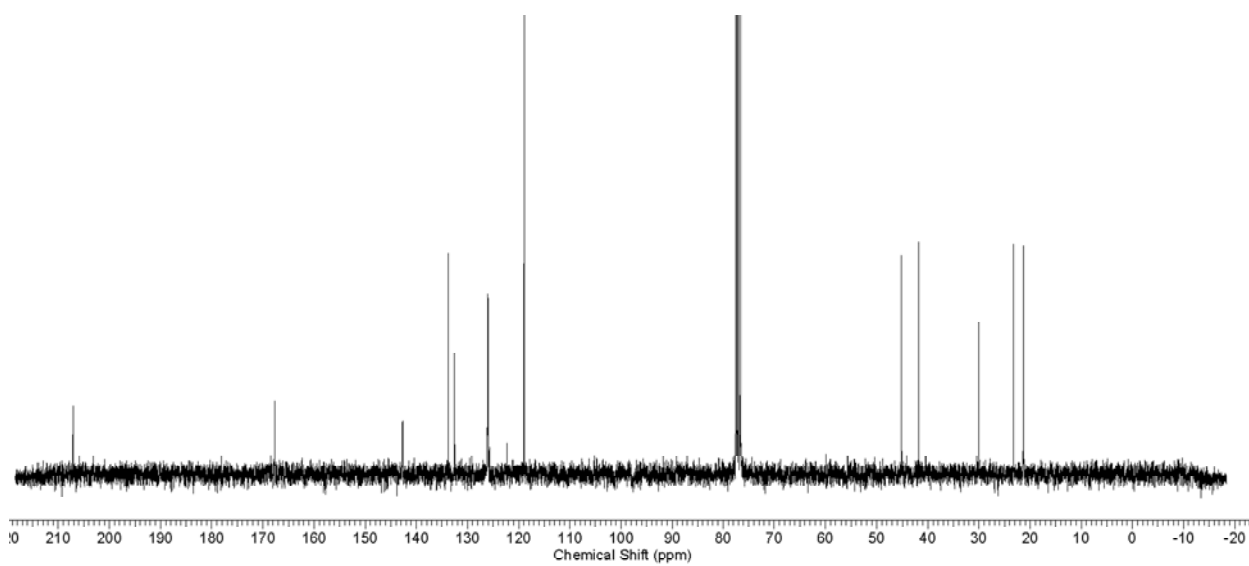

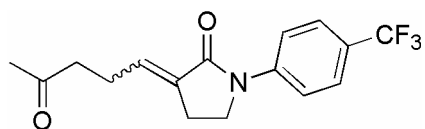

**4d**

**Z isomer**

**400 MHz, CDCl<sub>3</sub>**

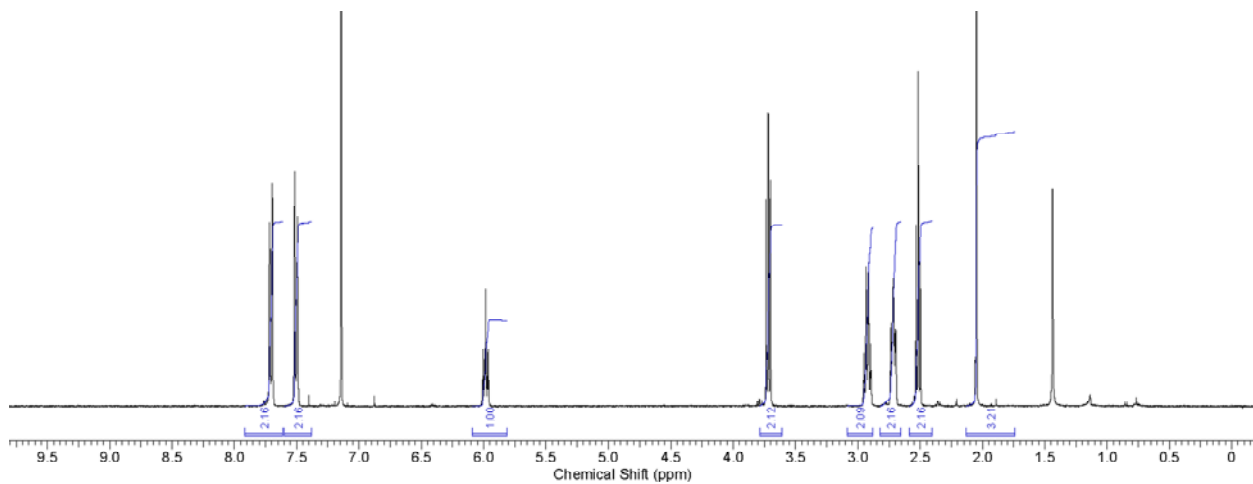

**100 MHz, CDCl<sub>3</sub>**

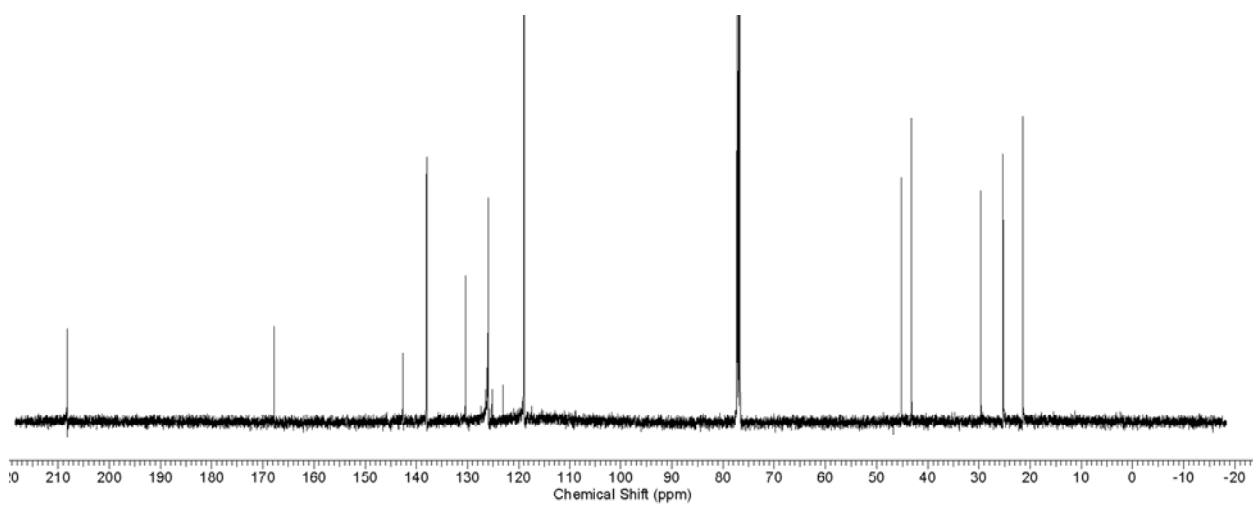

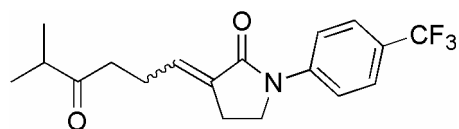

**4e**

**mixture of diastereomers**

**400 MHz, CDCl<sub>3</sub>**

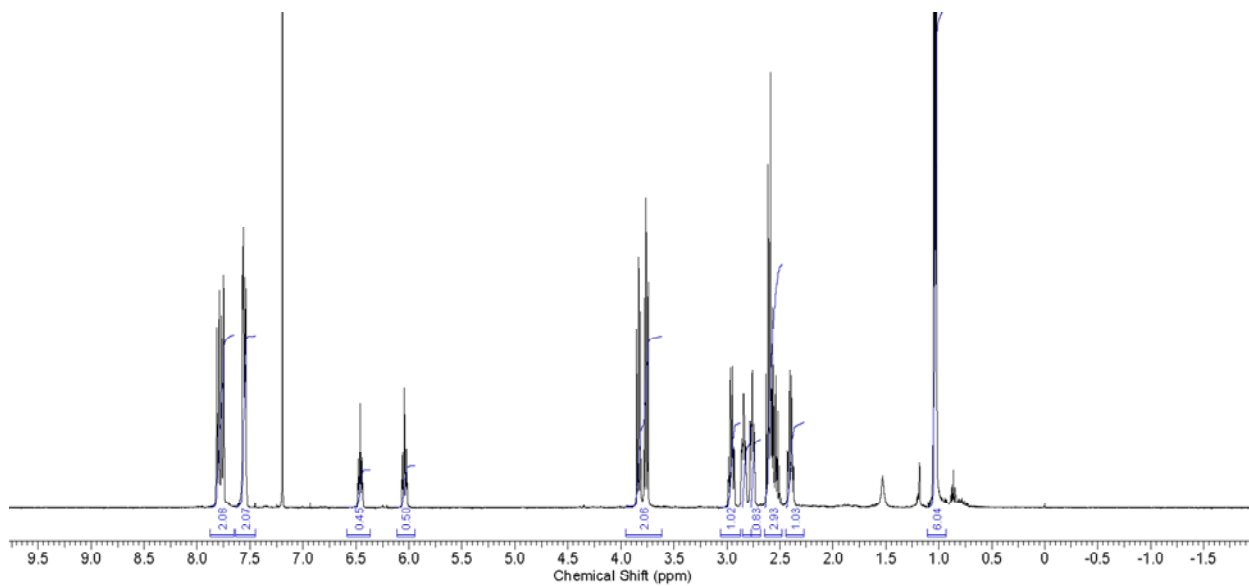

**100 MHz, CDCl<sub>3</sub>**

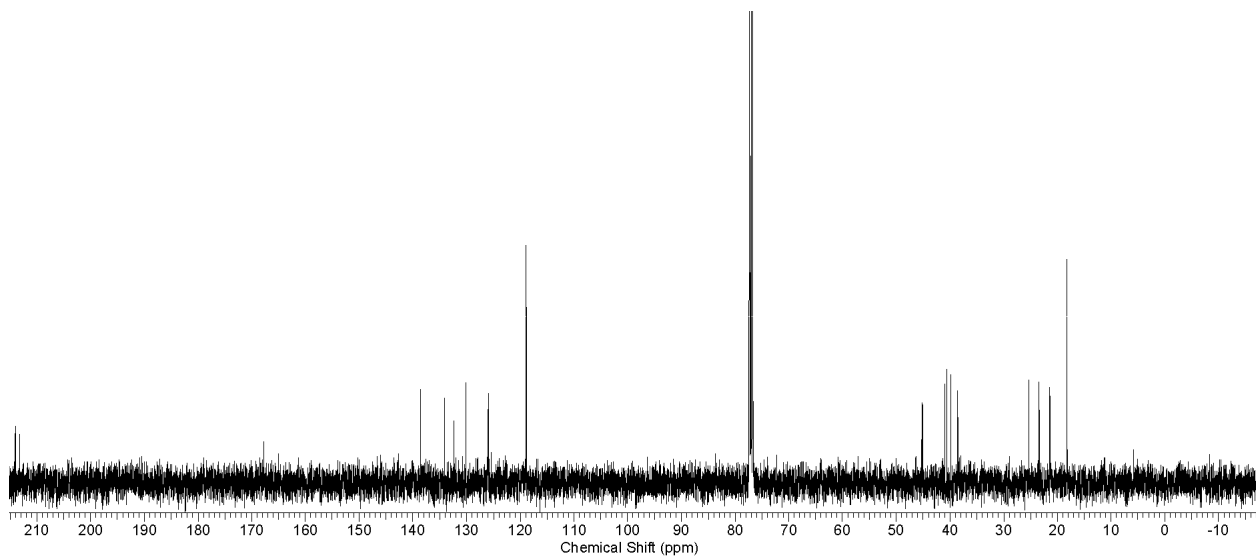

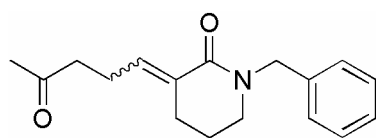

**4f**      **E isomer**

**400 MHz, CDCl<sub>3</sub>**

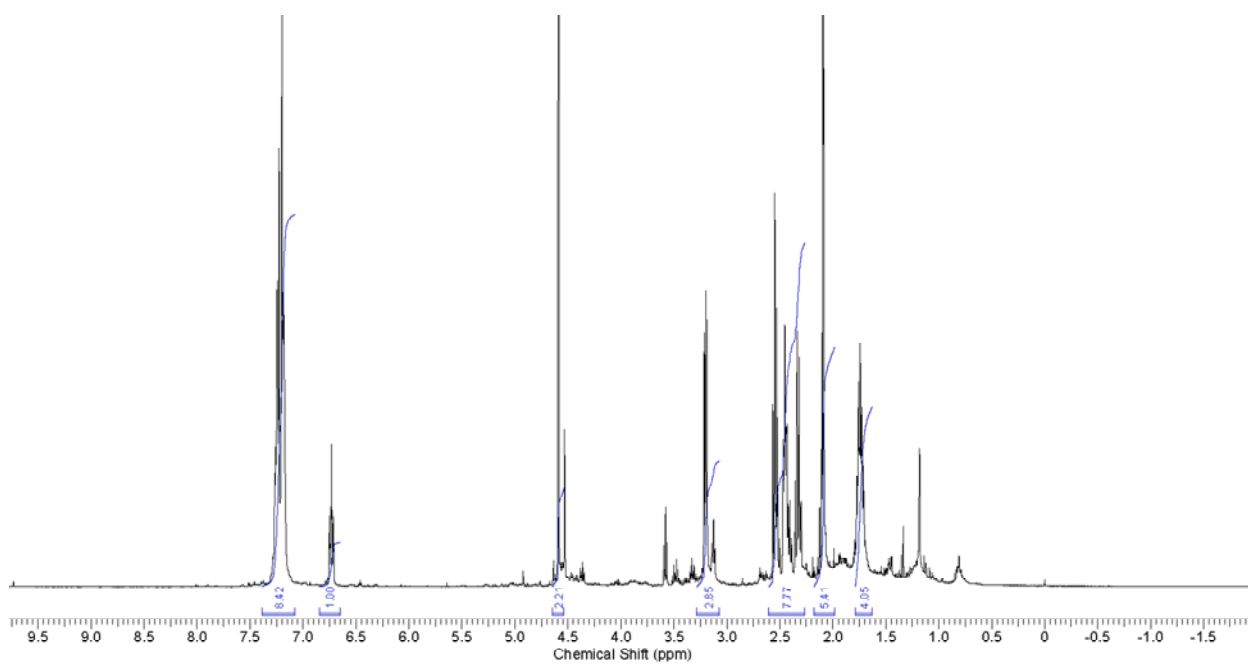

**100 MHz, CDCl<sub>3</sub>**

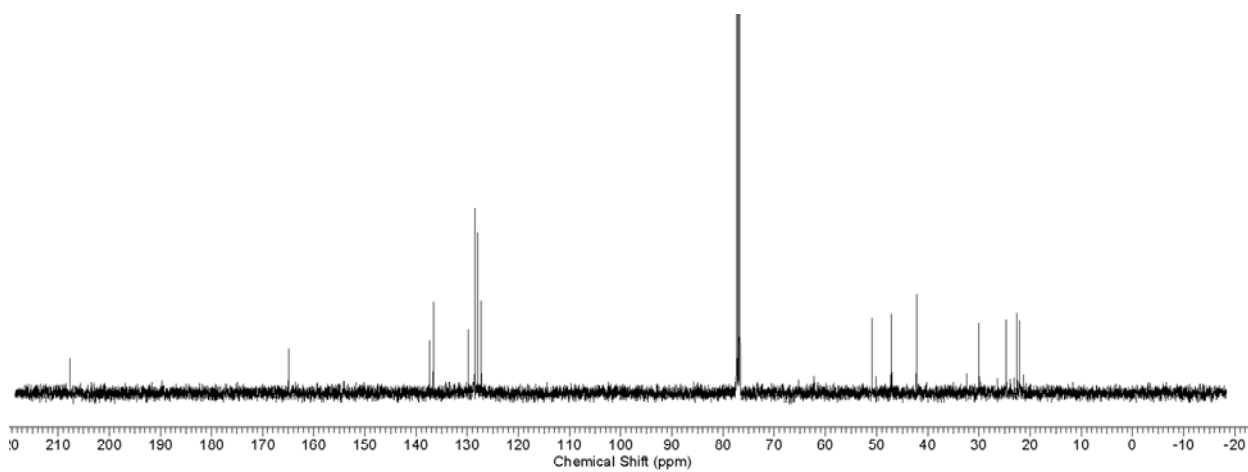

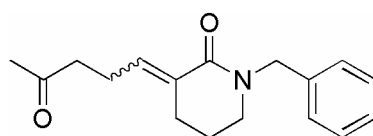

**4f** **Z isomer**

**400 MHz, CDCl<sub>3</sub>**

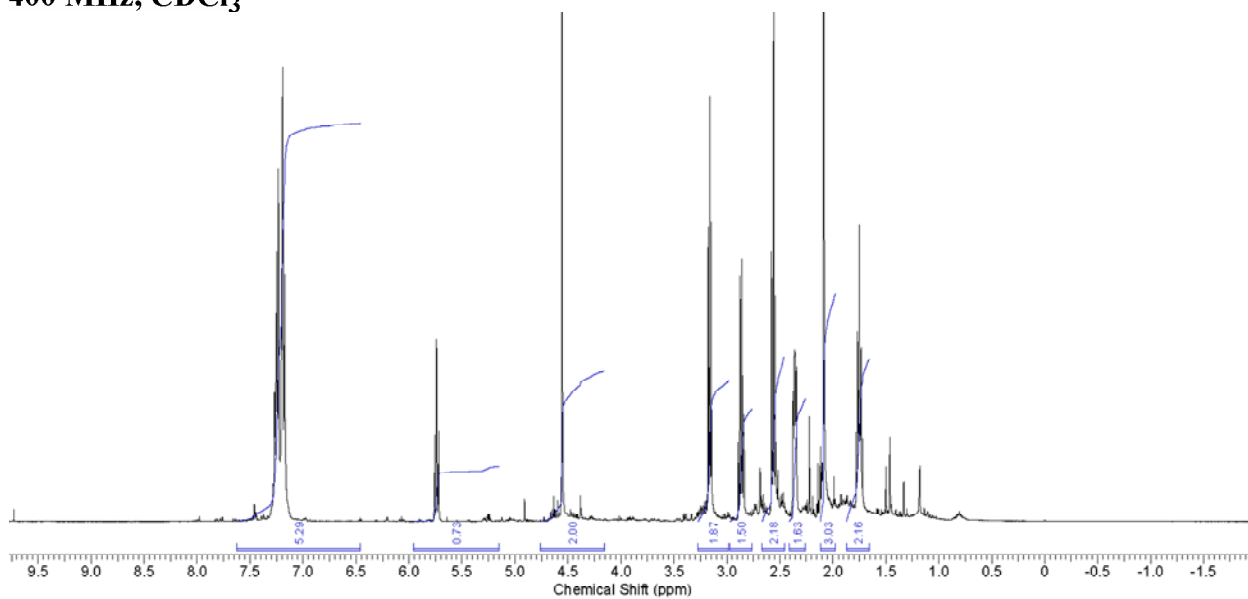

**100 MHz, CDCl<sub>3</sub>**

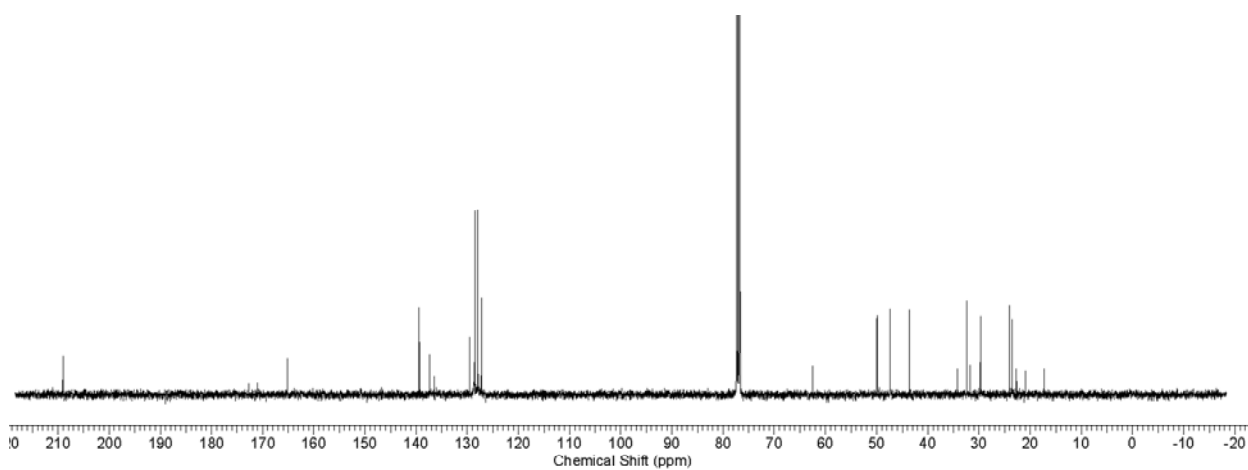

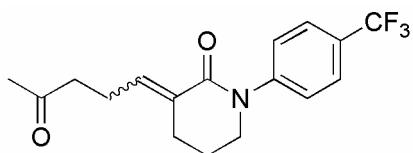

4h

E isomer

400 MHz, CDCl<sub>3</sub>

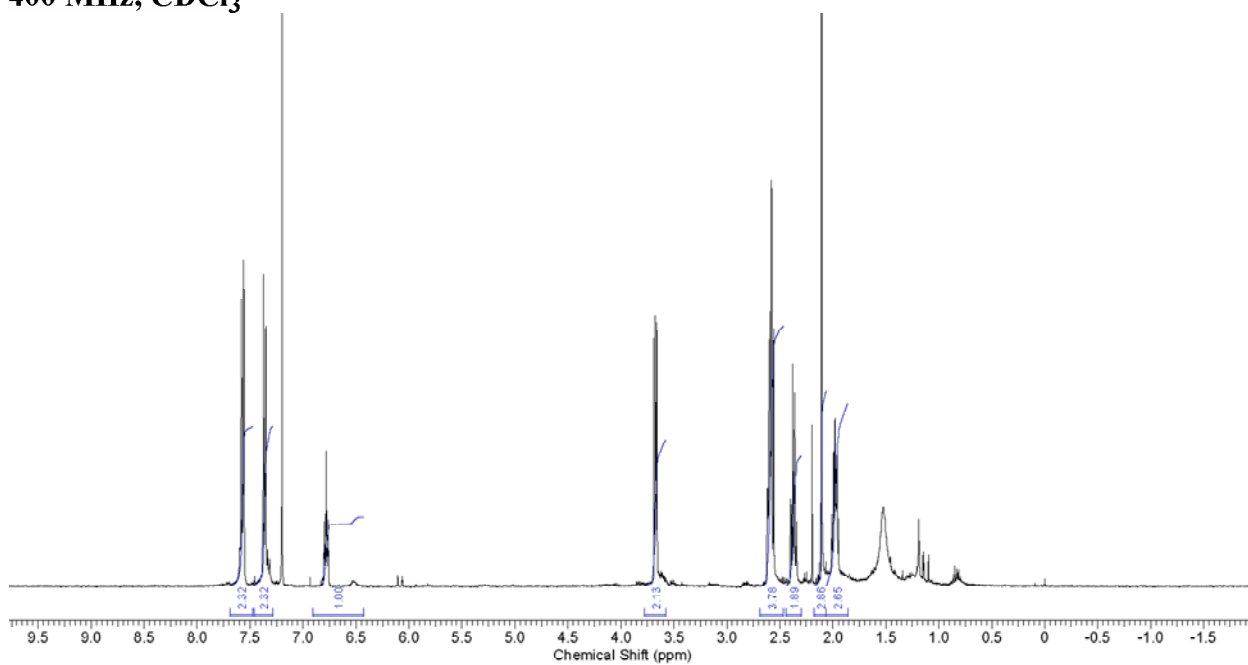

100 MHz, CDCl<sub>3</sub>

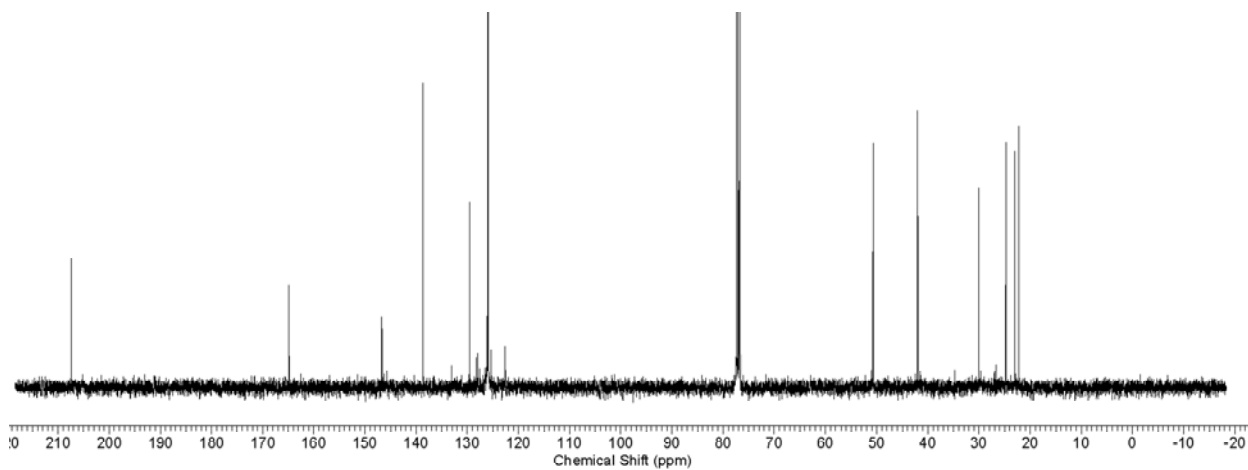

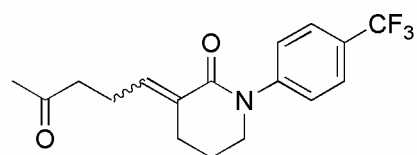

**4h**

**Z isomer**

**400 MHz, CDCl<sub>3</sub>**

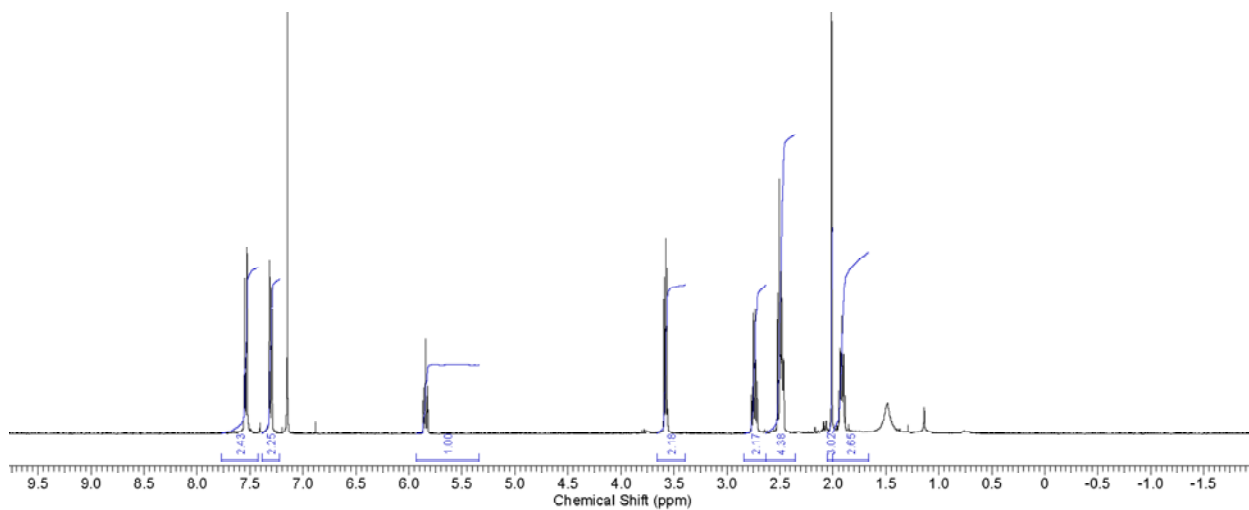

**100 MHz, CDCl<sub>3</sub>**

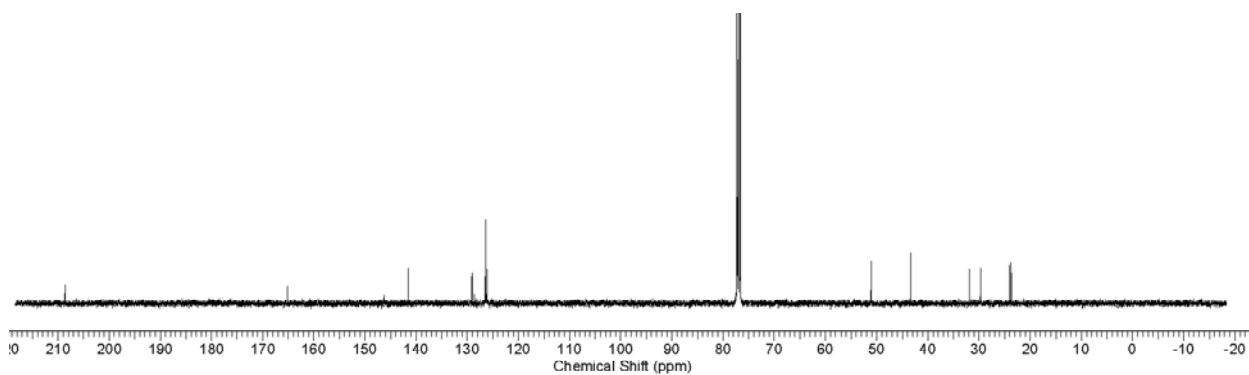



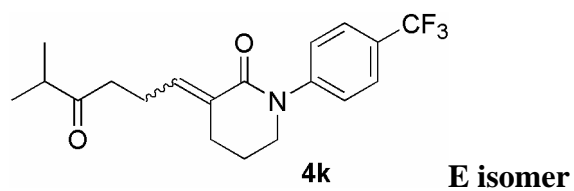

**500 MHz, CDCl<sub>3</sub>**

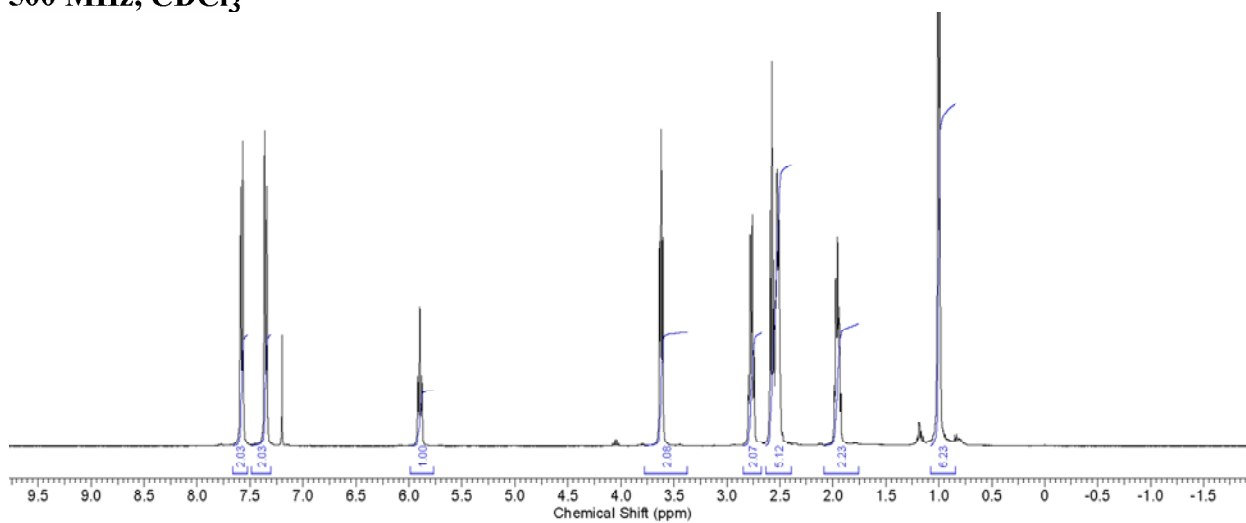

**125 MHz, CDCl<sub>3</sub>**

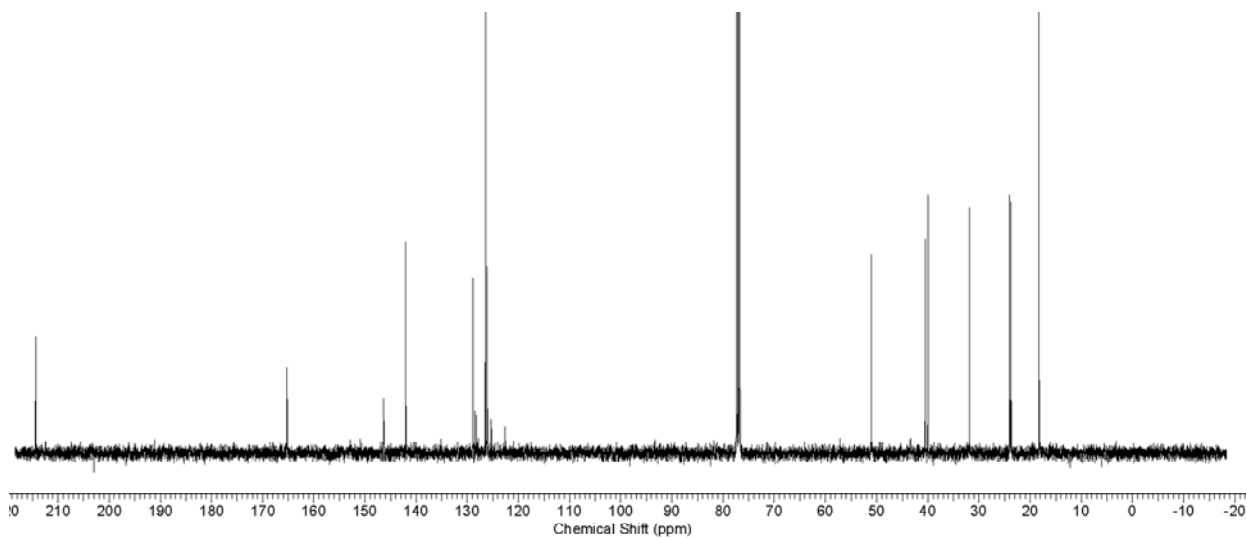

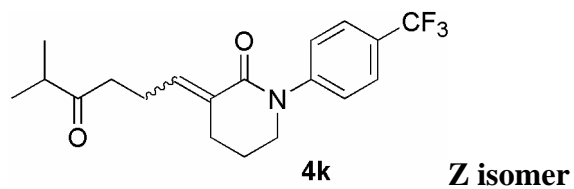

**400 MHz, CDCl<sub>3</sub> 100 MHz, CDCl<sub>3</sub>**

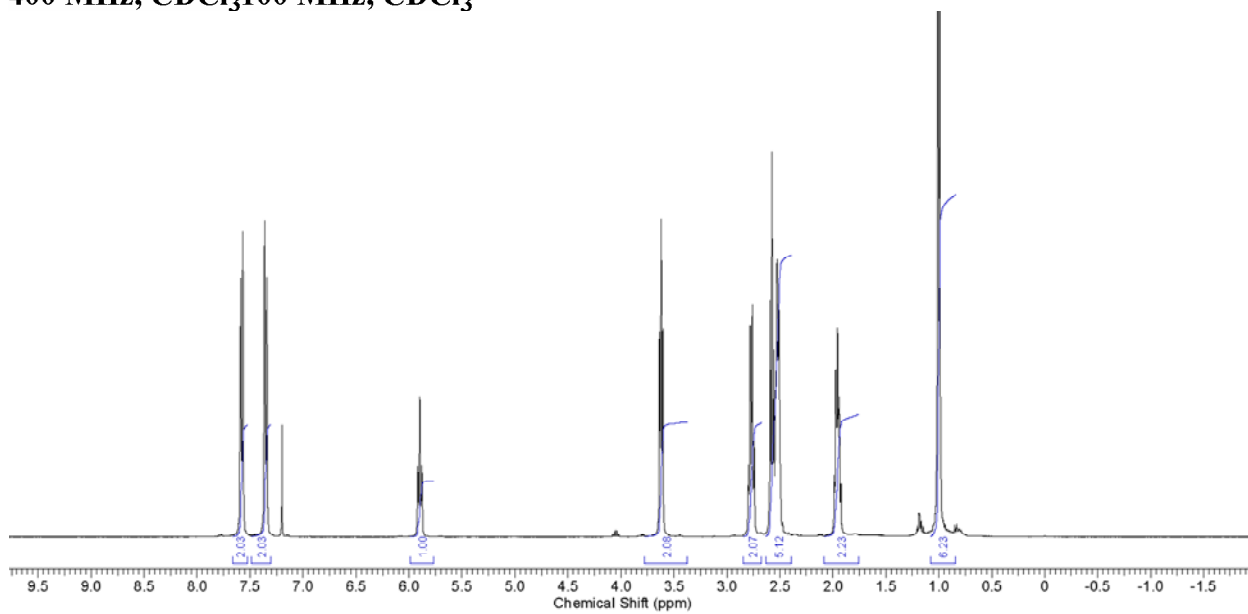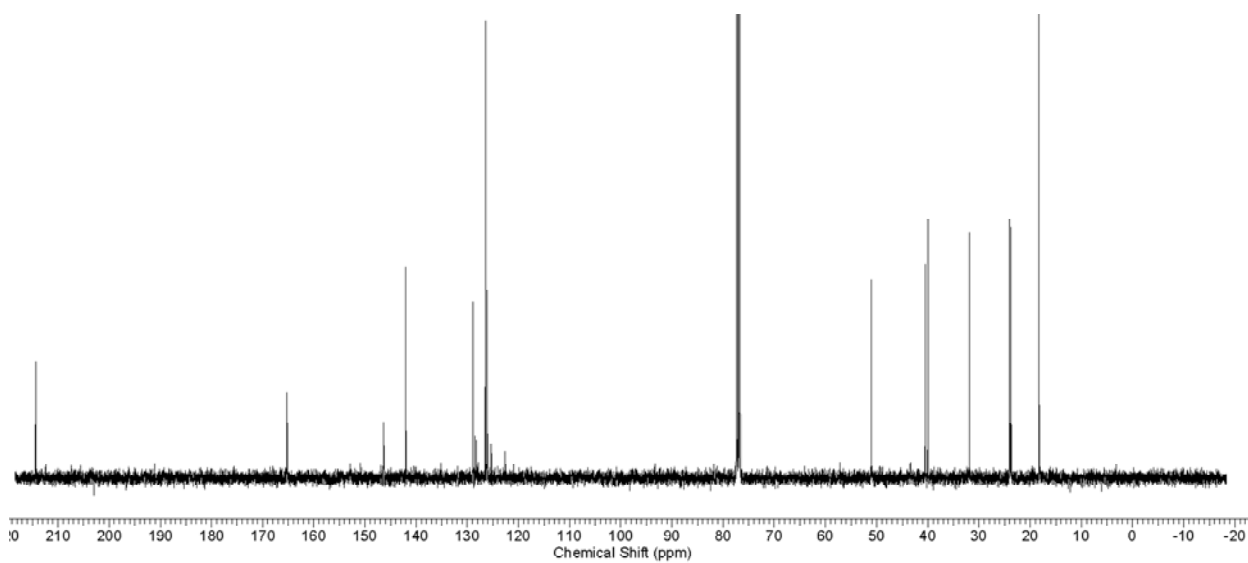

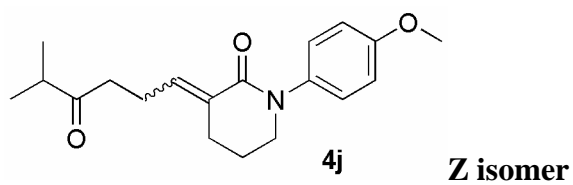

**400 MHz, CDCl<sub>3</sub>**

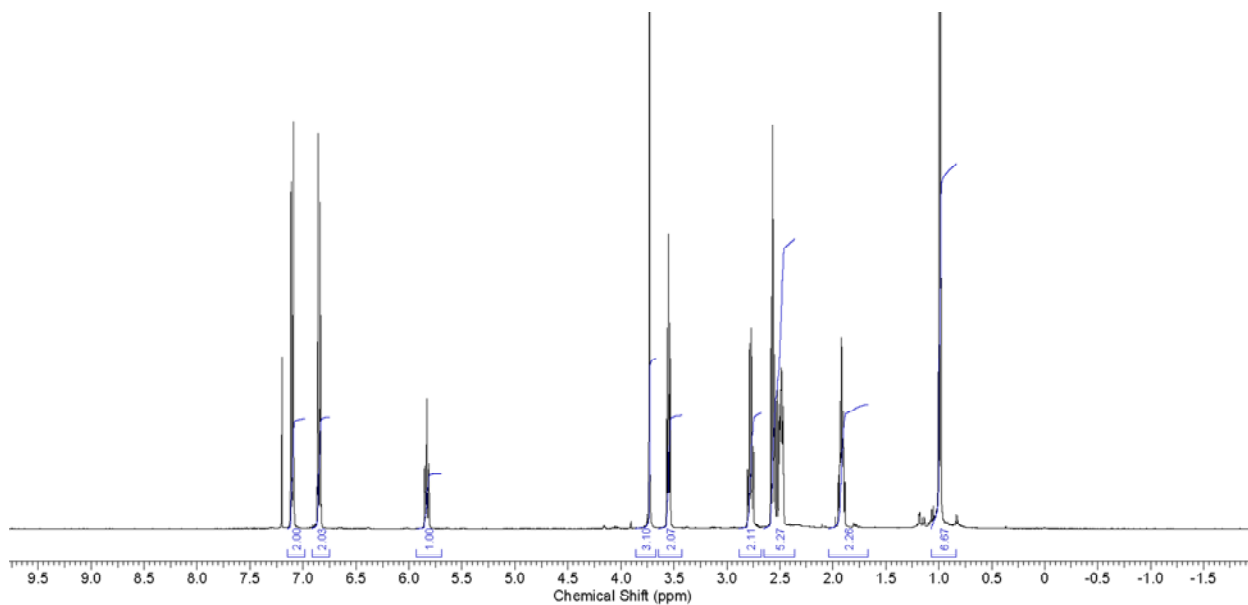

**100 MHz, CDCl<sub>3</sub>**

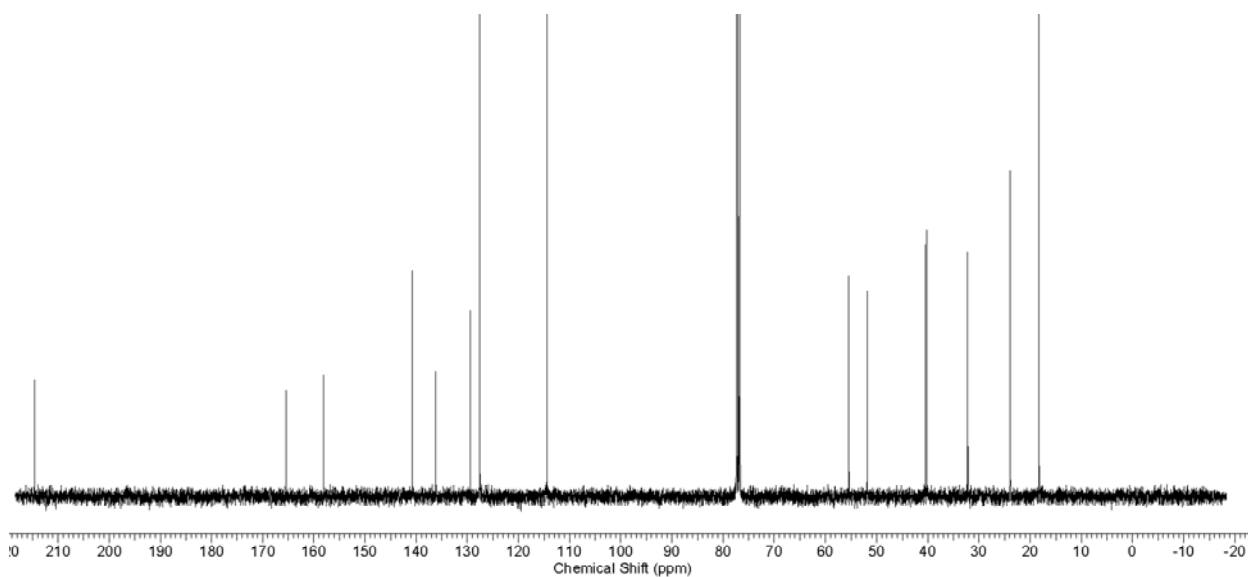

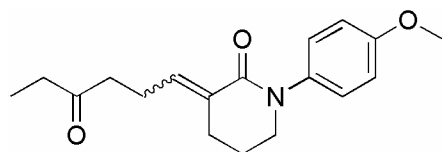

4i

E isomer

400 MHz, CDCl<sub>3</sub>

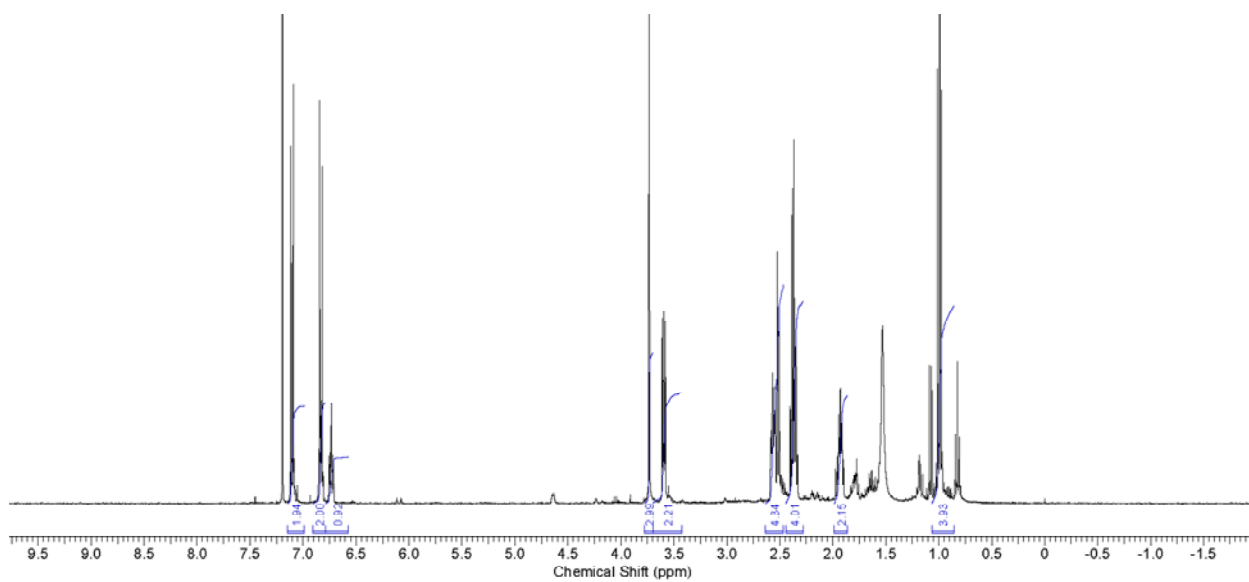

100 MHz, CDCl<sub>3</sub>

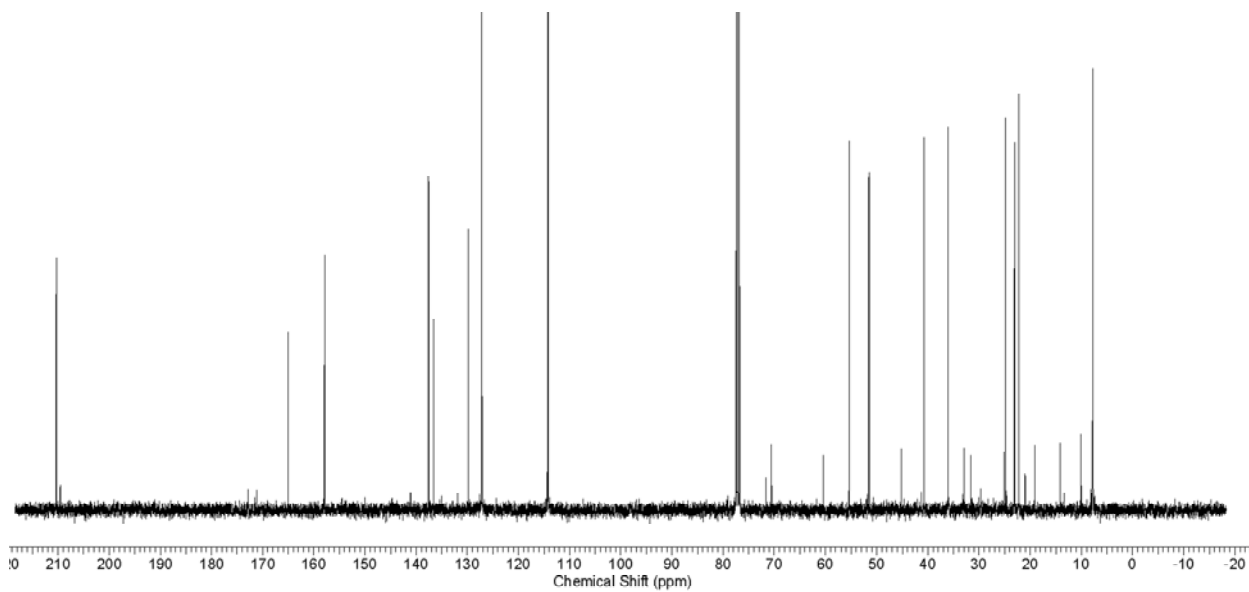

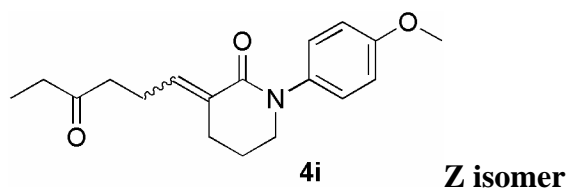

**400 MHz, CDCl<sub>3</sub>**

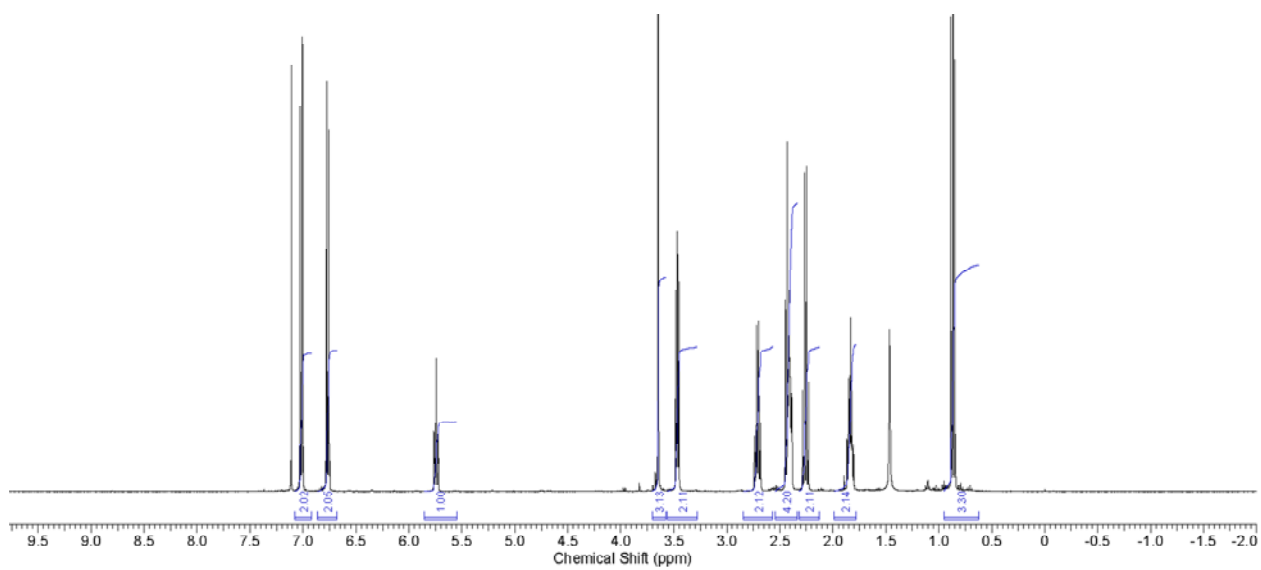

**100 MHz, CDCl<sub>3</sub>**

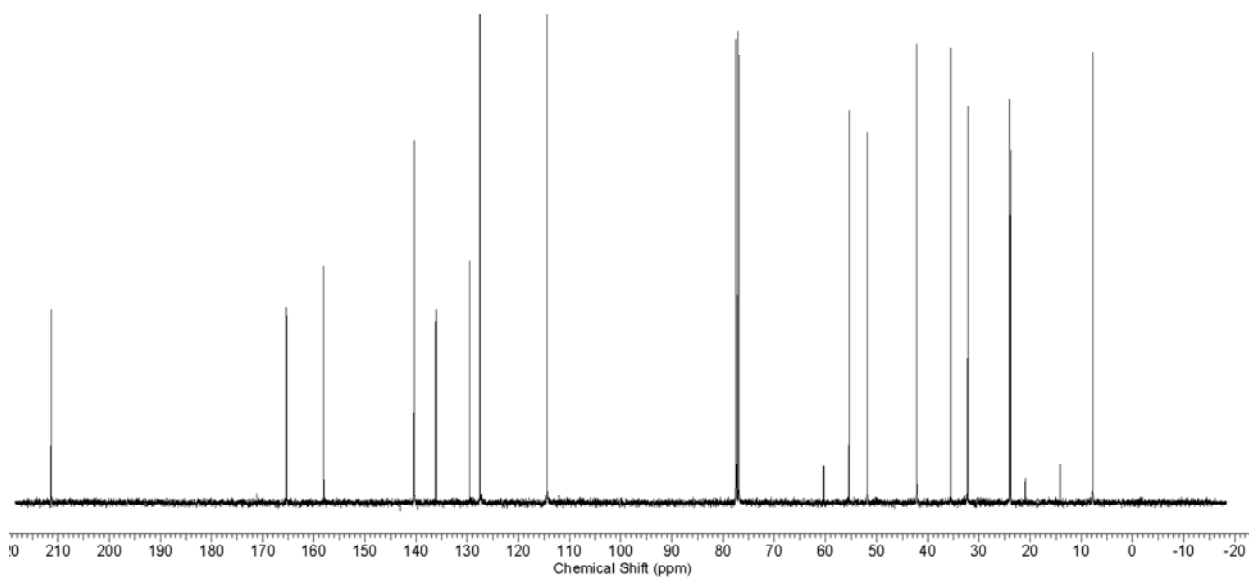

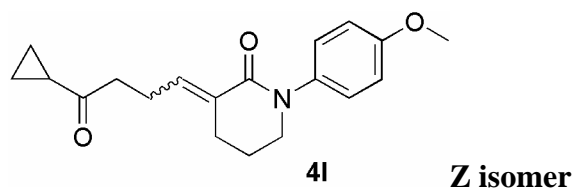

**400 MHz, CDCl<sub>3</sub>**

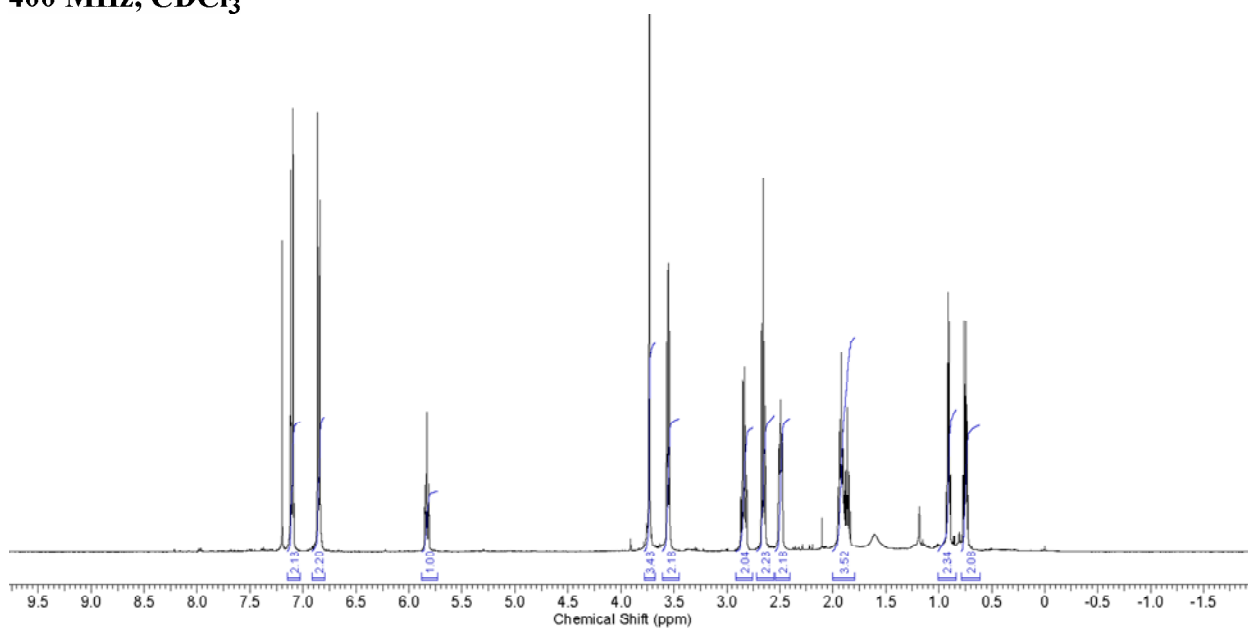

**100 MHz, CDCl<sub>3</sub>**

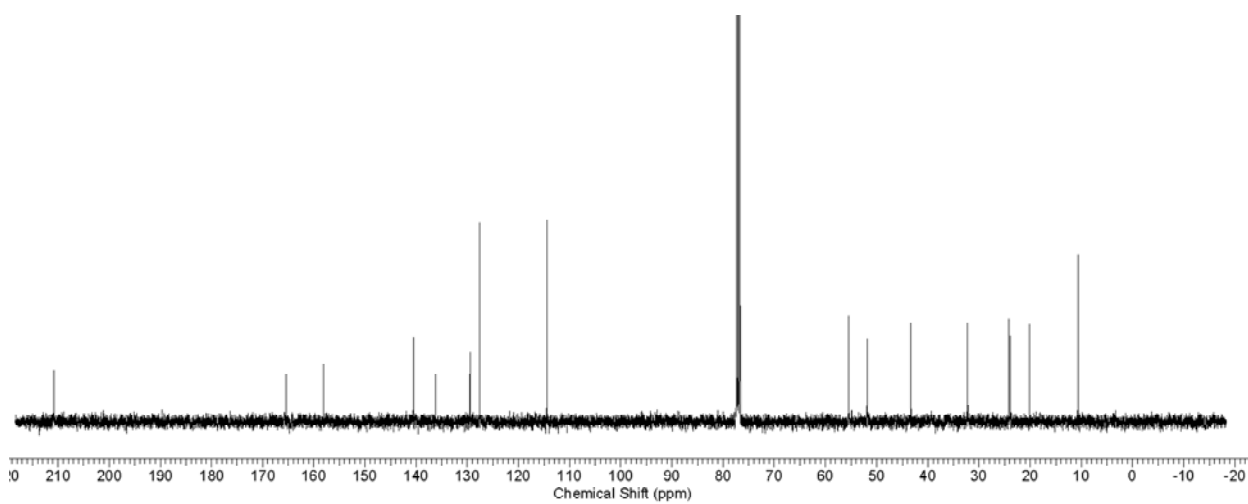

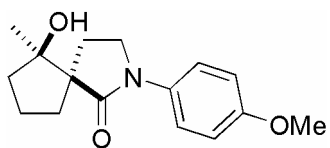

**7a**

**400 MHz, CDCl<sub>3</sub>**

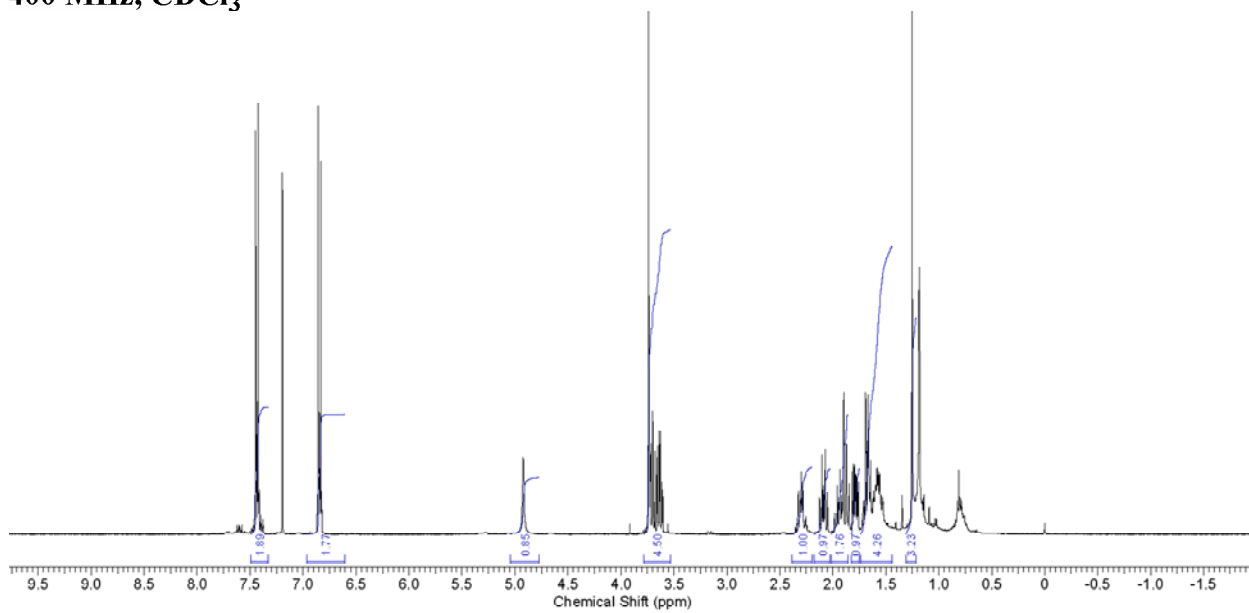

**100 MHz, CDCl<sub>3</sub>**

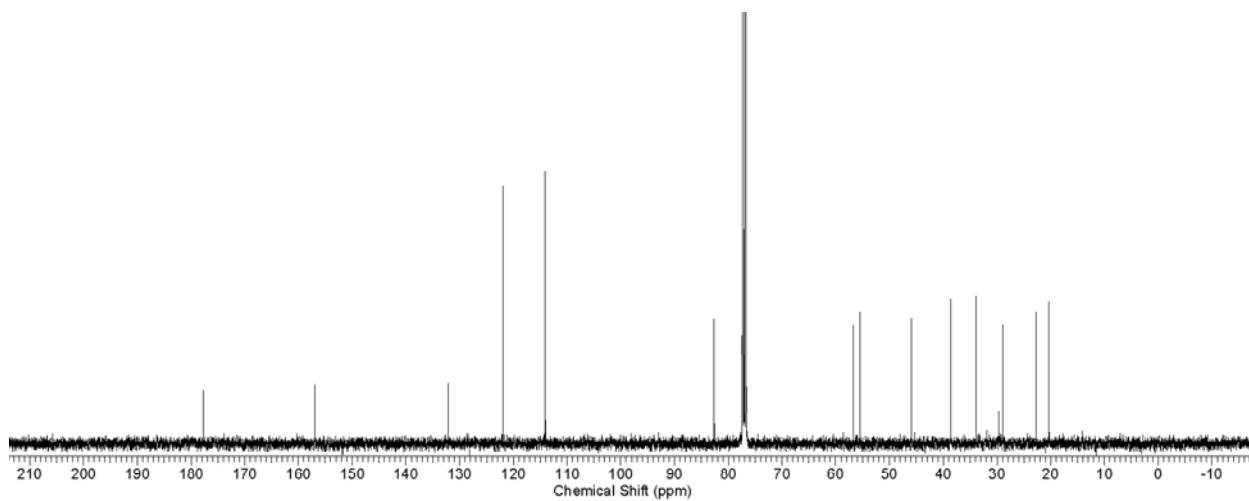

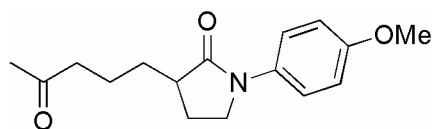

**8a**

**400 MHz, CDCl<sub>3</sub>**

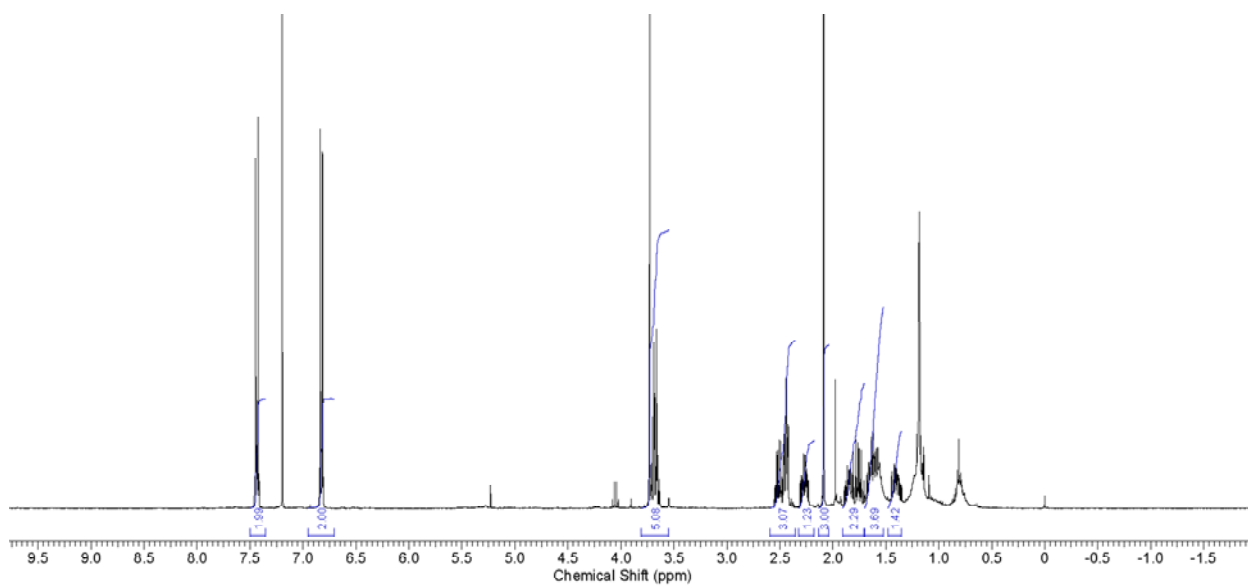

**100 MHz, CDCl<sub>3</sub>**

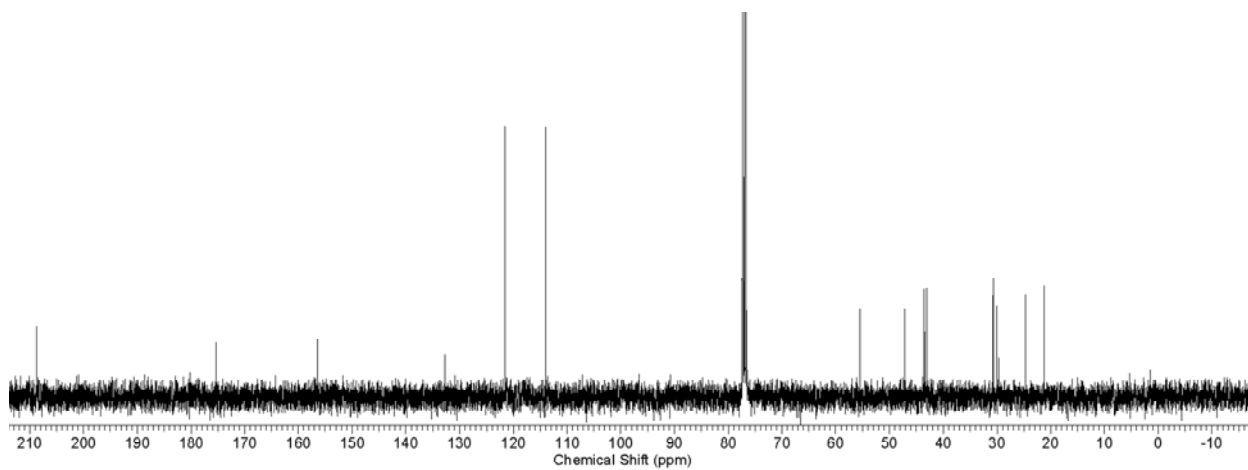



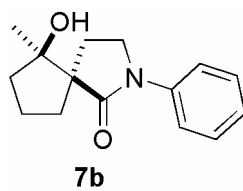

**400 MHz, CDCl<sub>3</sub>**

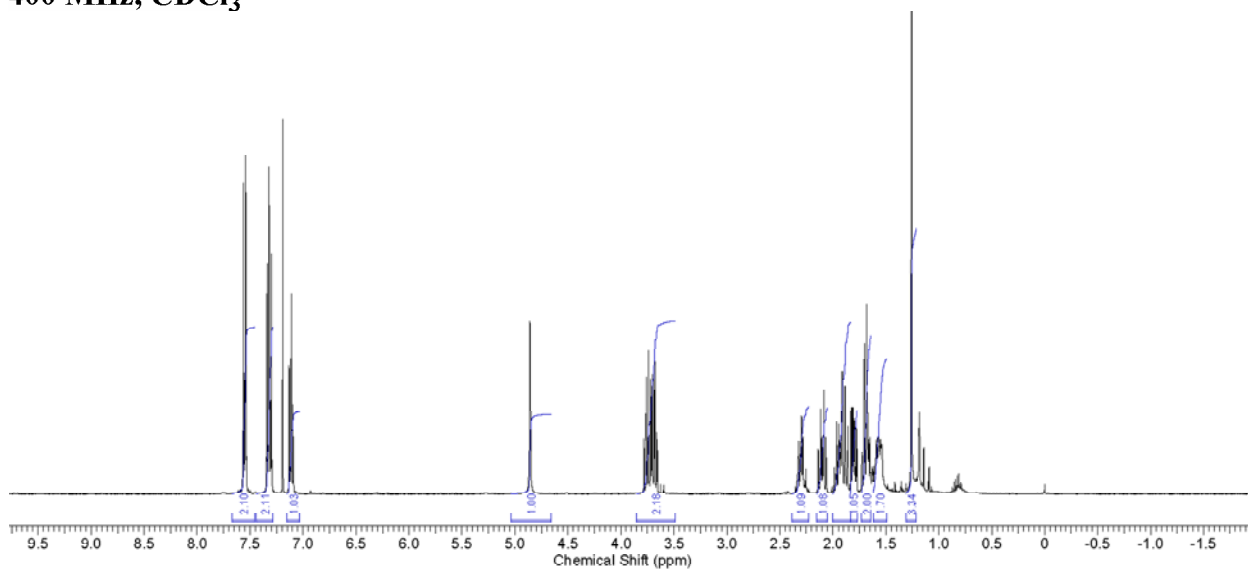

**100 MHz, CDCl<sub>3</sub>**

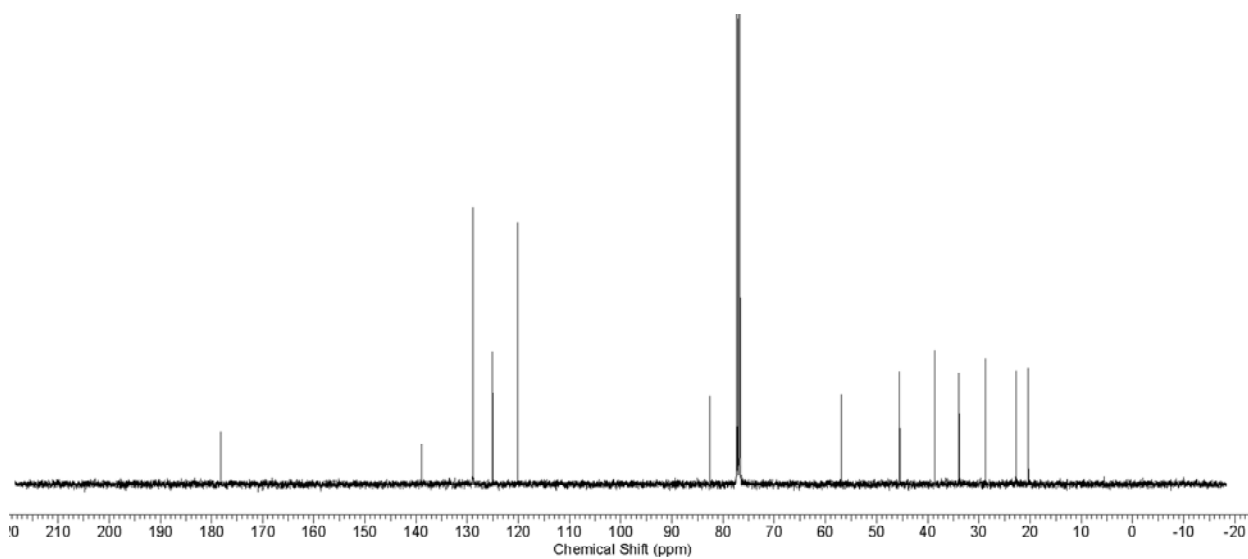

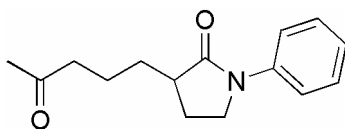

**8b**

**500 MHz, CDCl<sub>3</sub>**

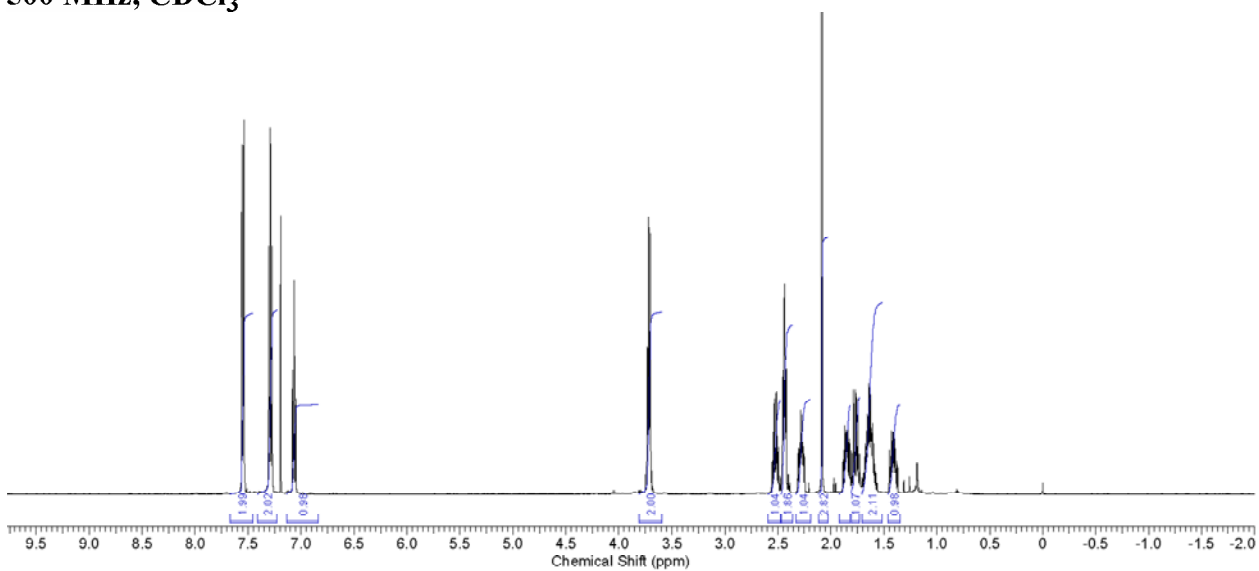

**125 MHz, CDCl<sub>3</sub>**

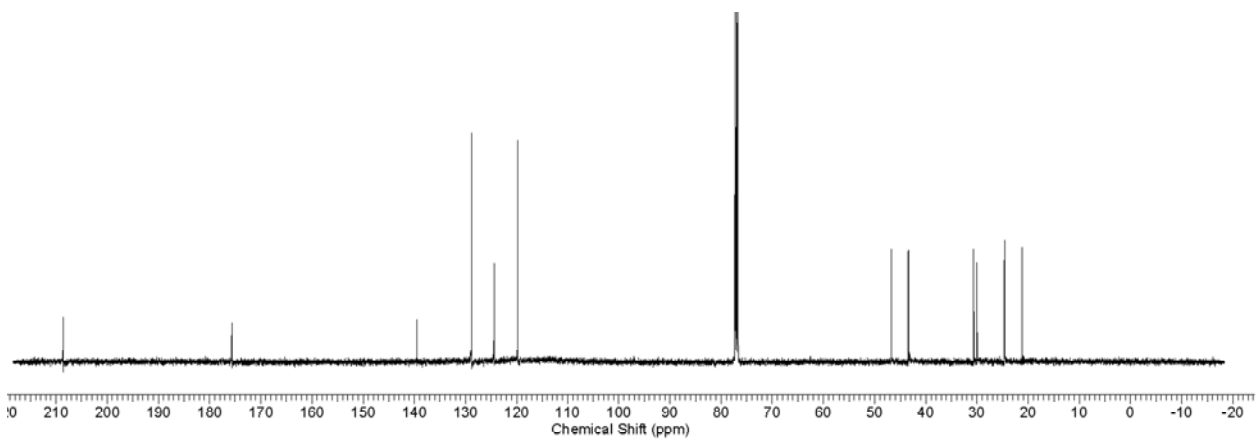

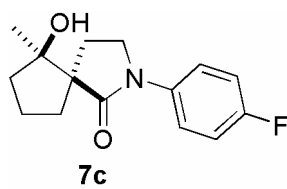

**500 MHz, CDCl<sub>3</sub>**

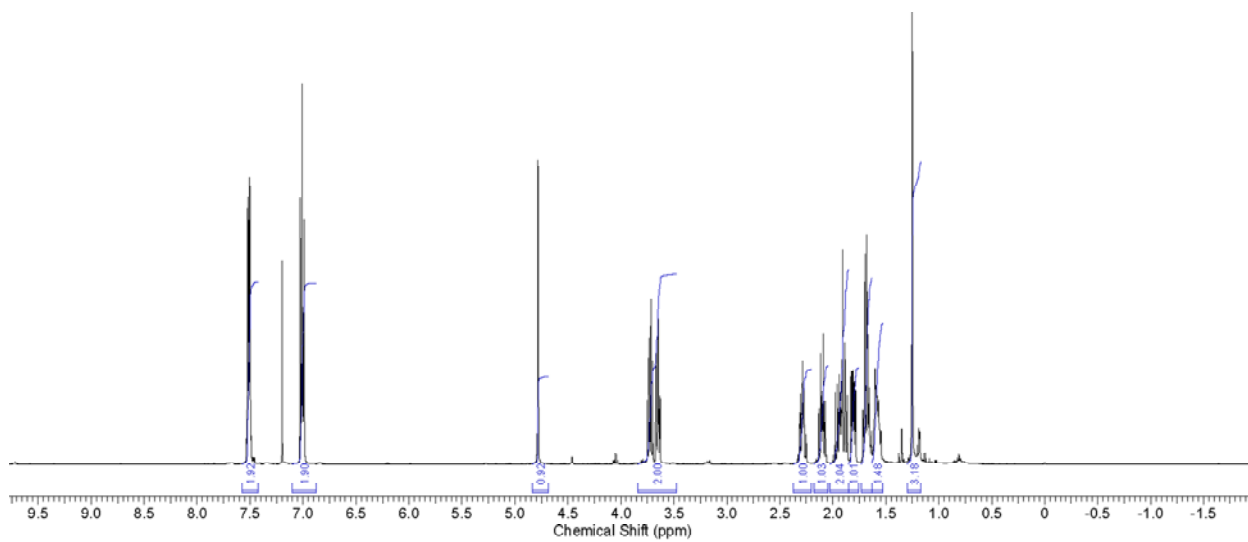

**125 MHz, CDCl<sub>3</sub>**

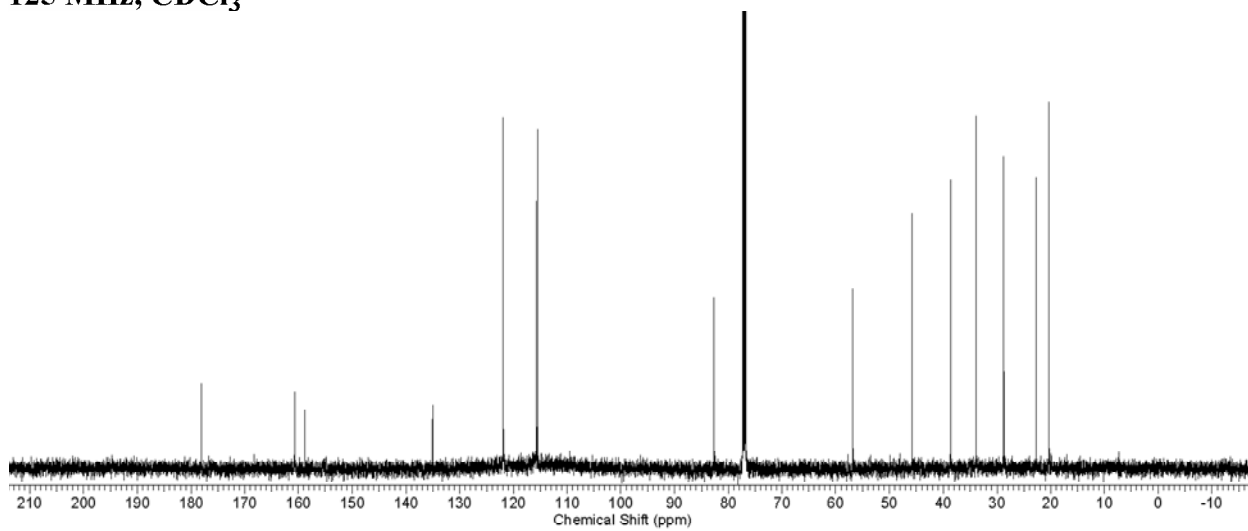

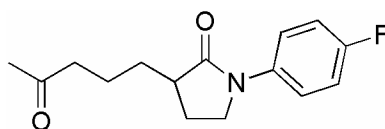

**8c**

**400 MHz, CDCl<sub>3</sub>**

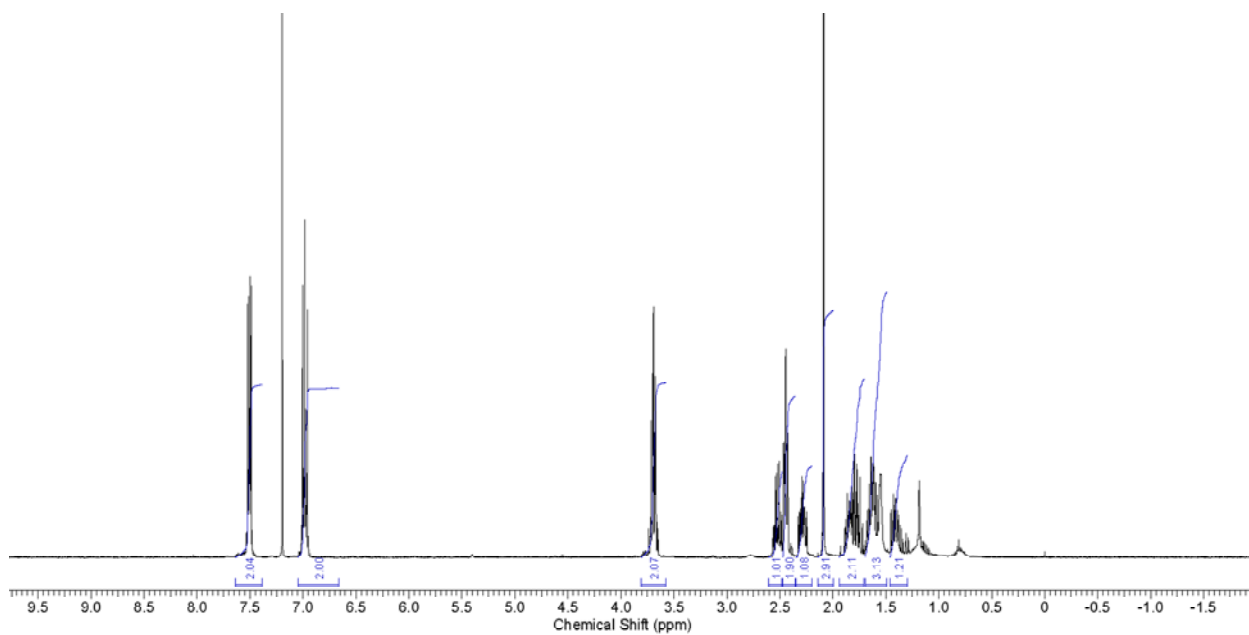

**125 MHz, CDCl<sub>3</sub>**

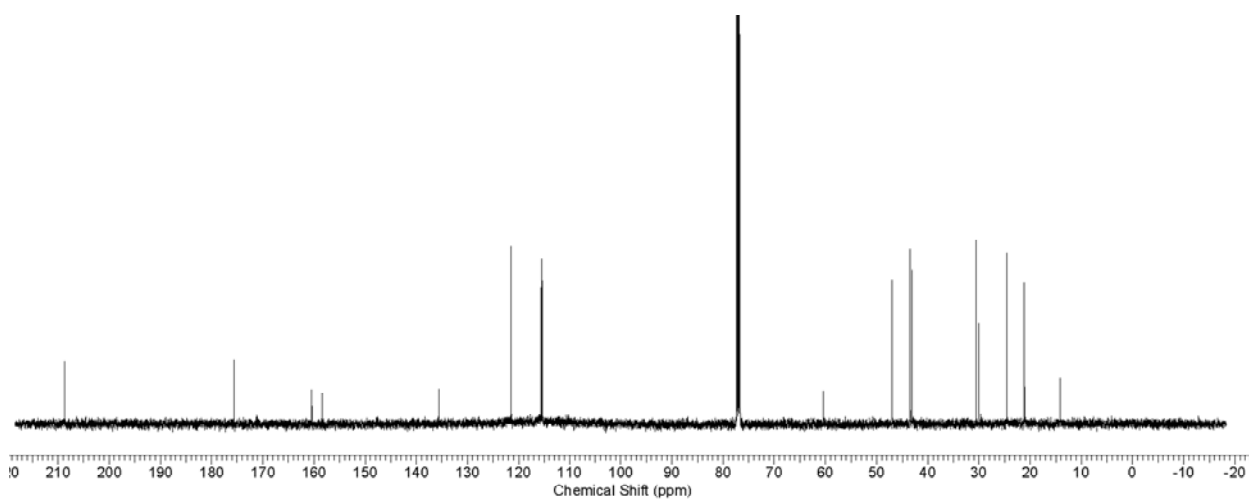

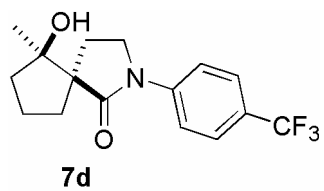

**400 MHz, CDCl<sub>3</sub>**

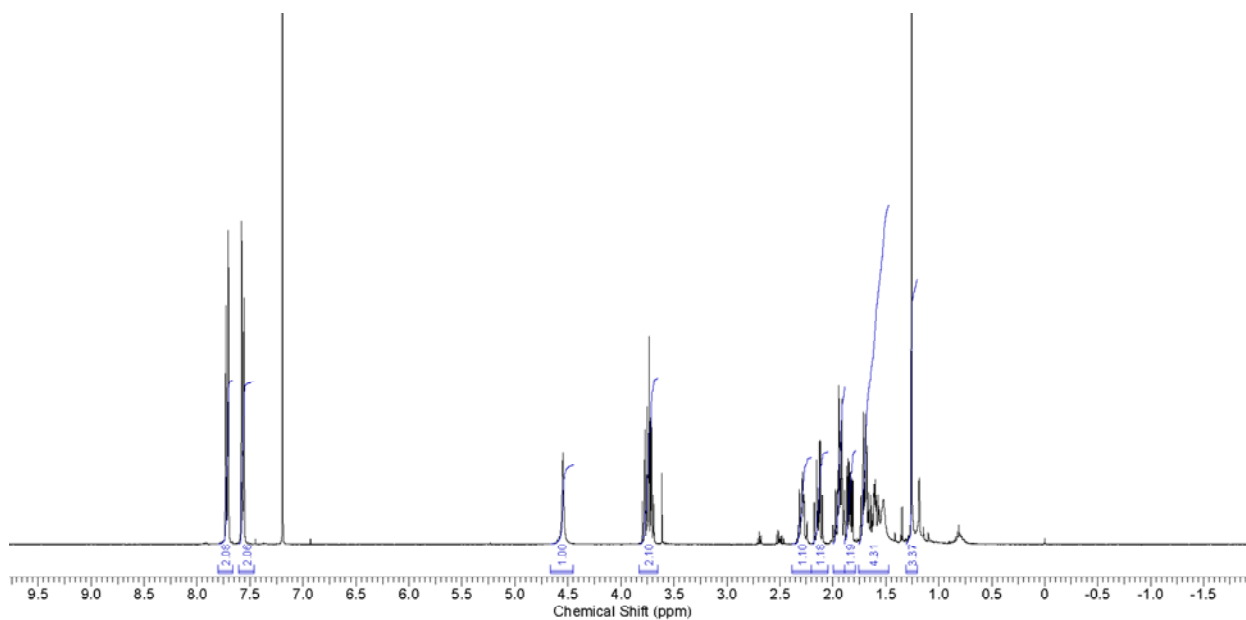

**125 MHz, CDCl<sub>3</sub>**

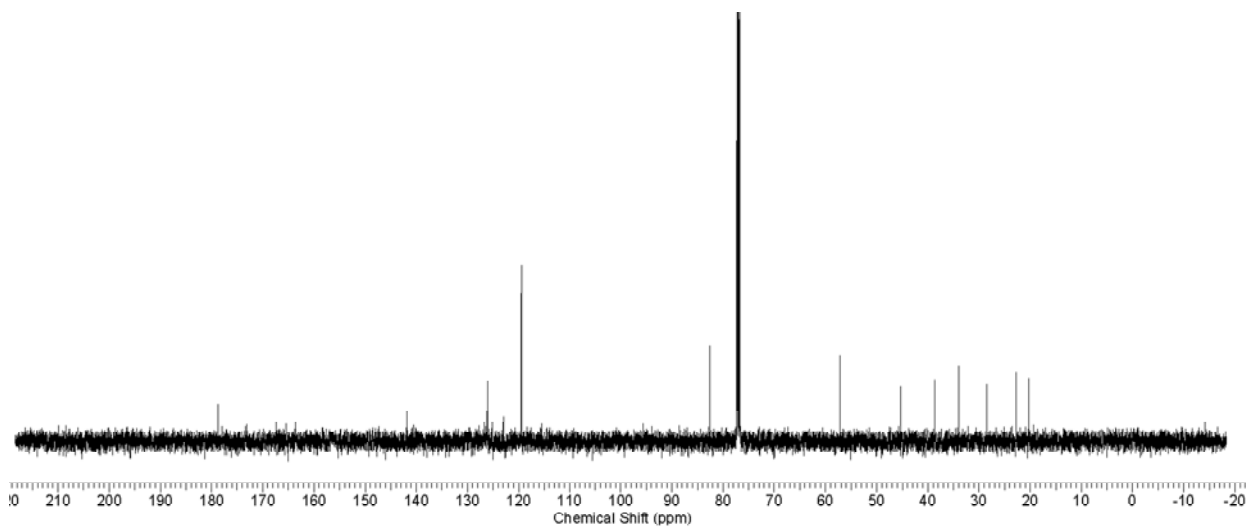

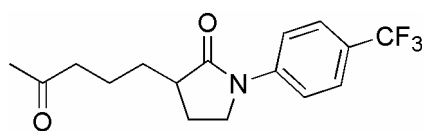

**8d**

**400 MHz, CDCl<sub>3</sub>**

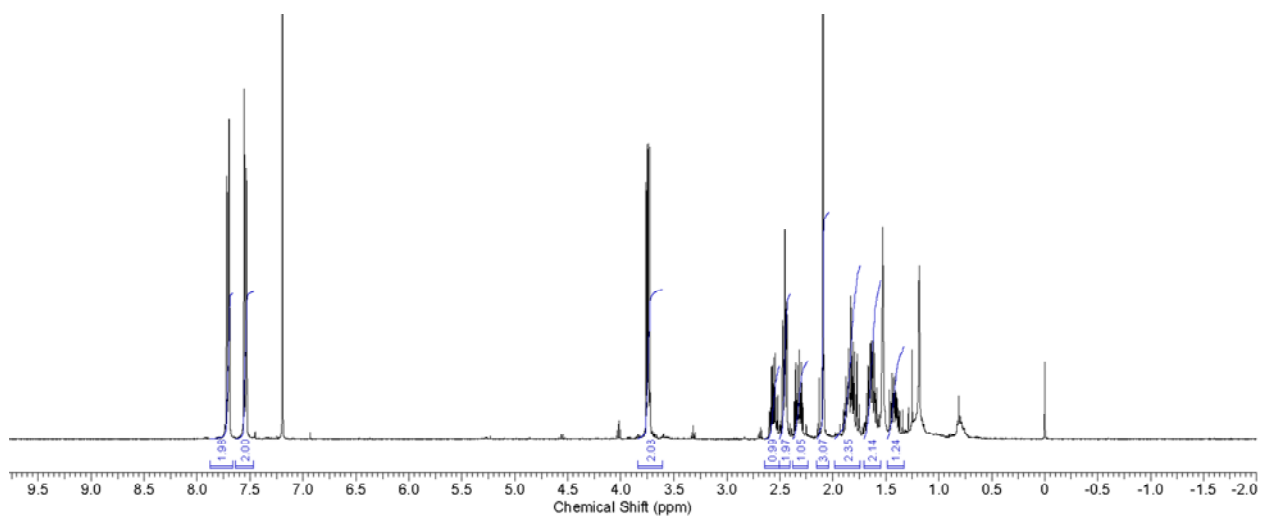

**100 MHz, CDCl<sub>3</sub>**

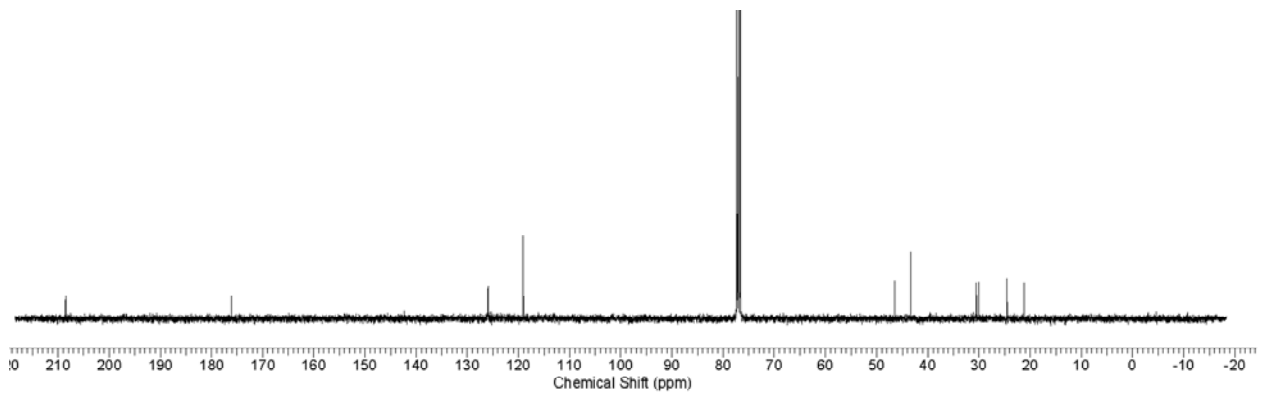

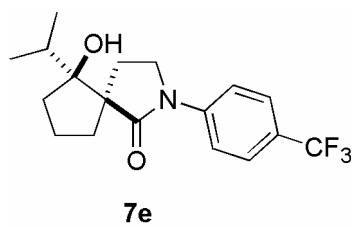

**400 MHz, CDCl<sub>3</sub>**

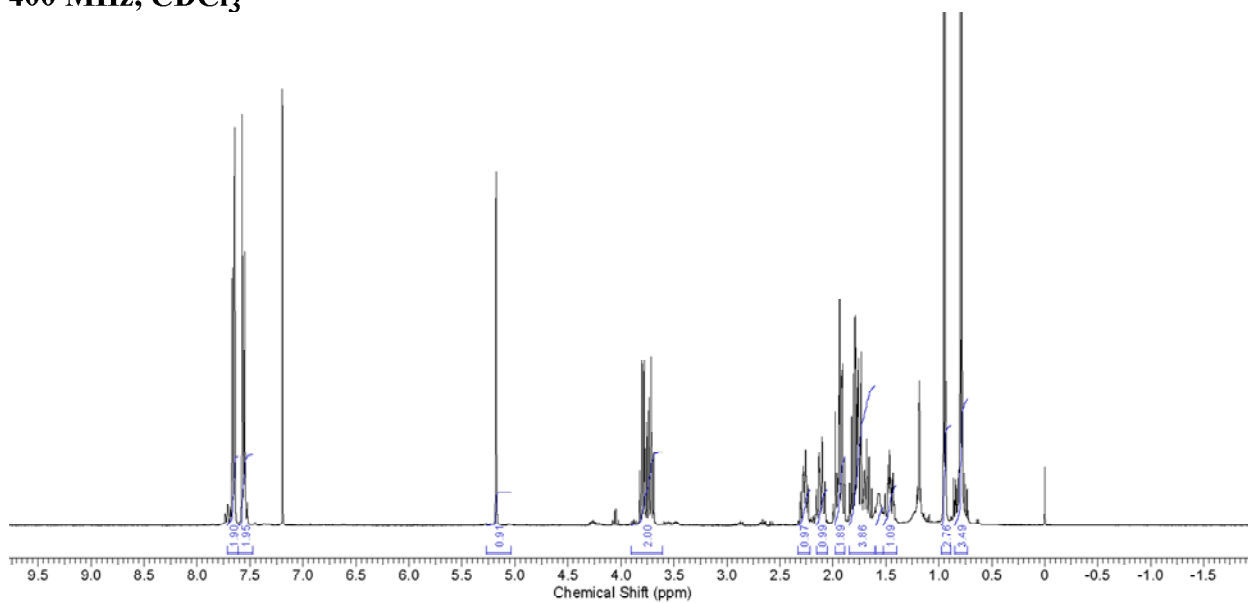

**100 MHz, CDCl<sub>3</sub>**

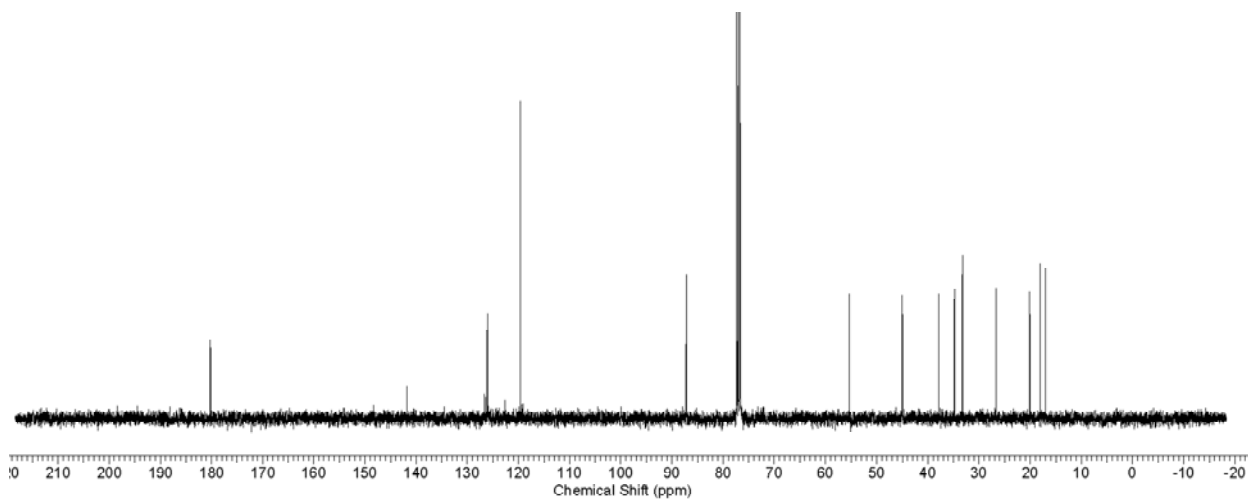

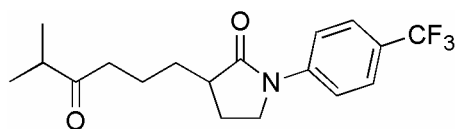

**8e**

**300 MHz, CDCl<sub>3</sub>**

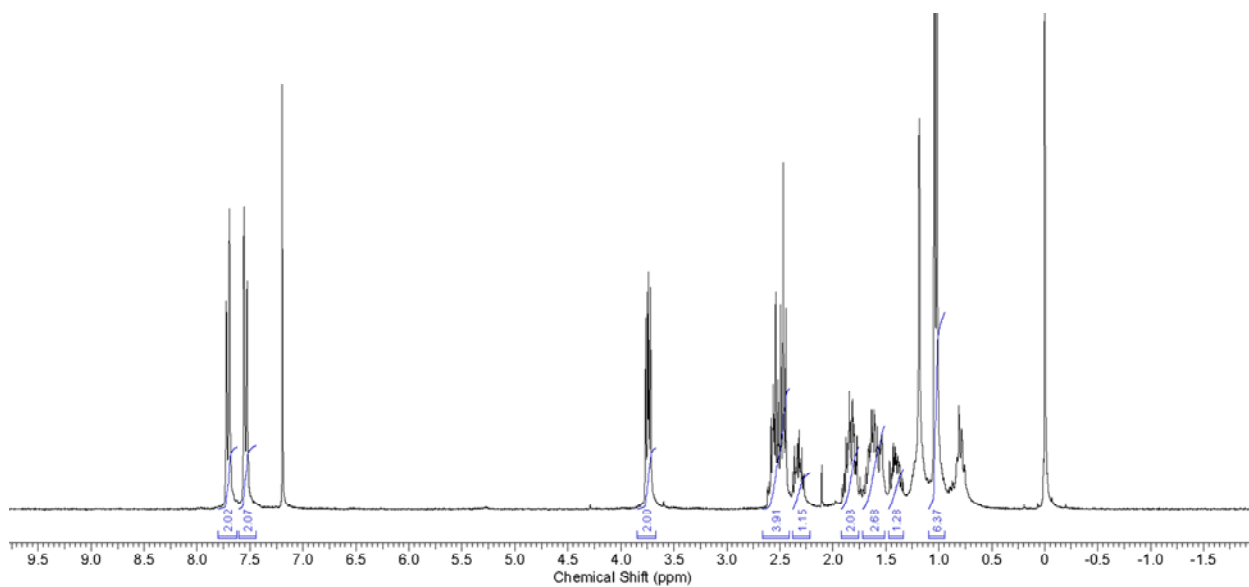

**100 MHz, CDCl<sub>3</sub>**

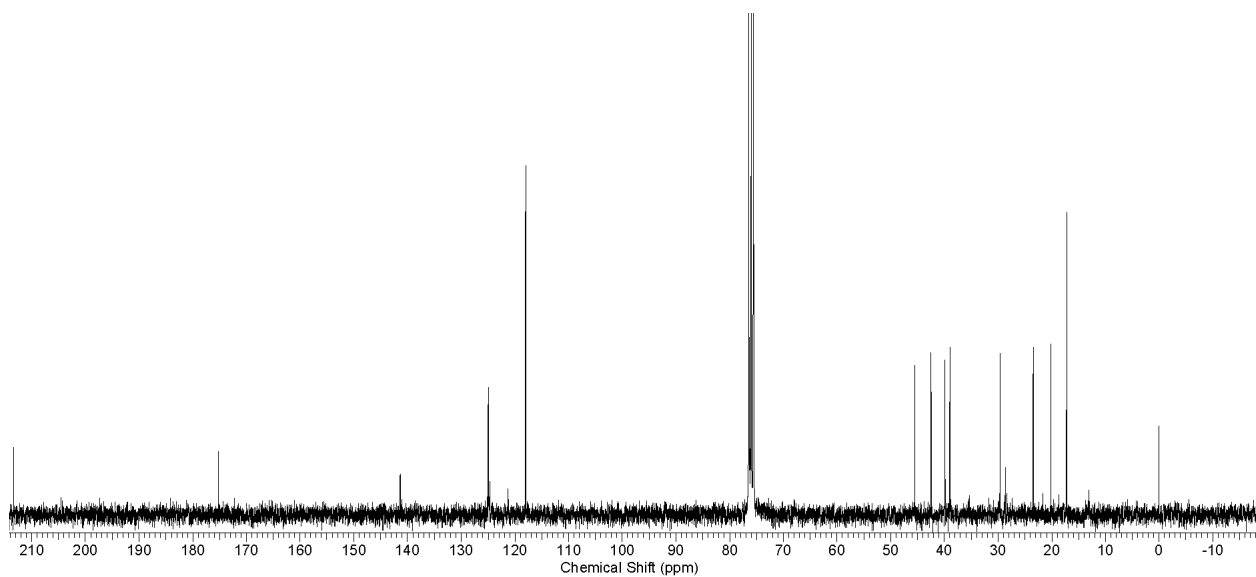



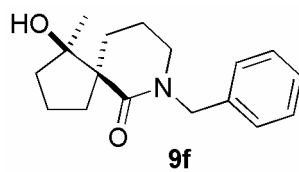

**400 MHz, CDCl<sub>3</sub>**

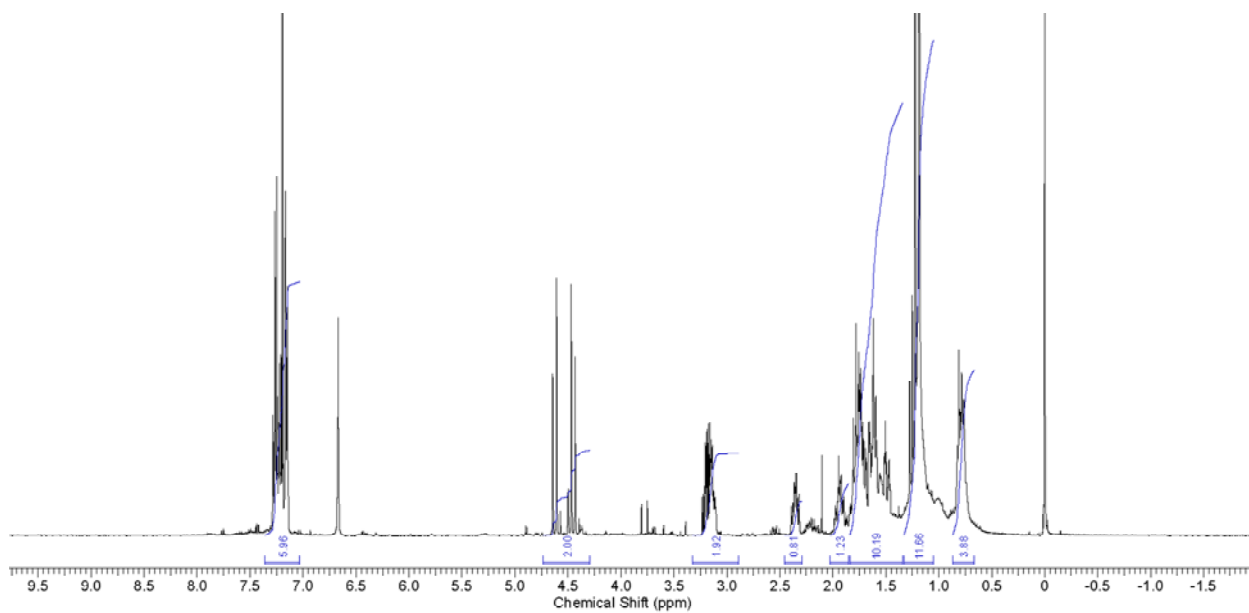

**100 MHz, CDCl<sub>3</sub>**

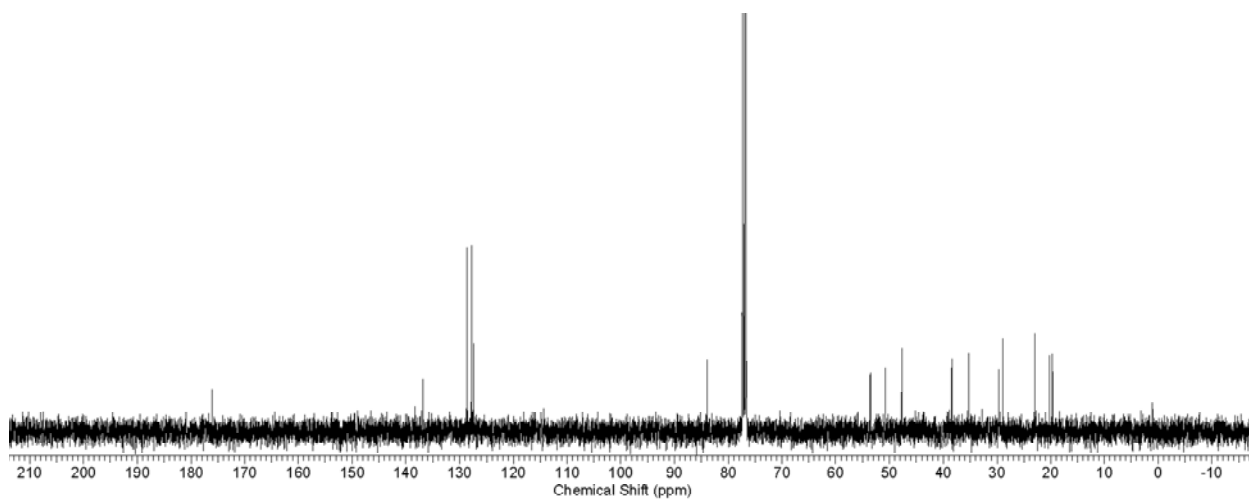

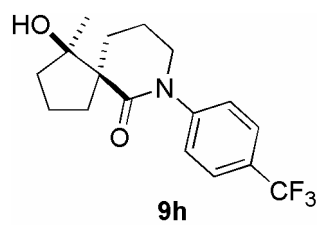

**300 MHz, CDCl<sub>3</sub>**

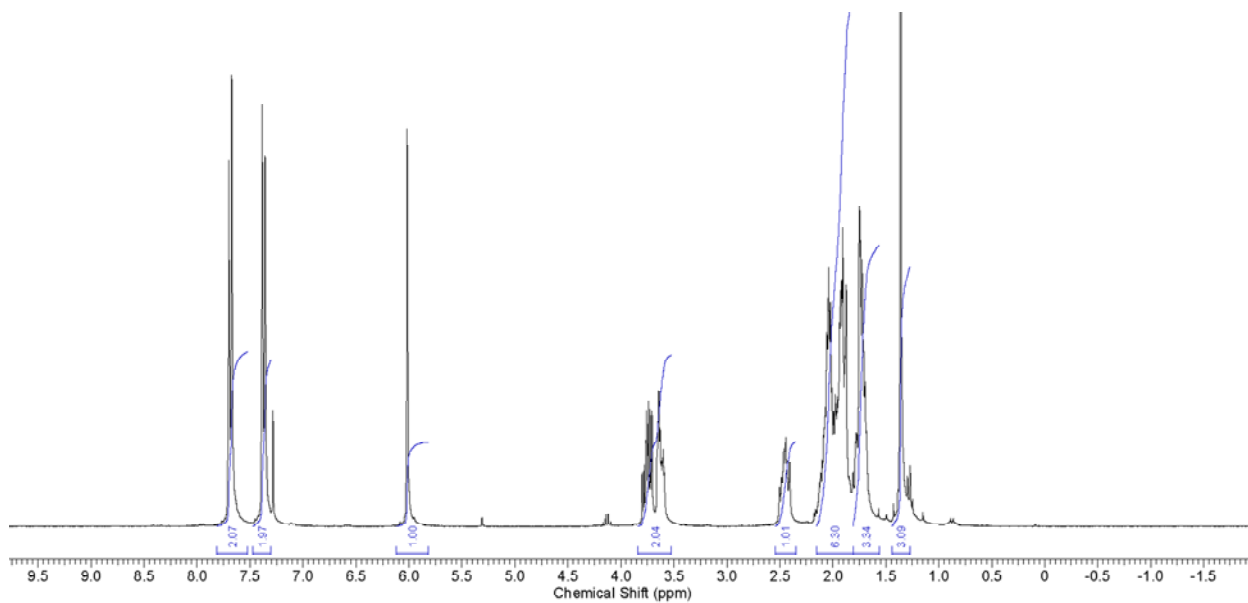

**75 MHz, CDCl<sub>3</sub>**

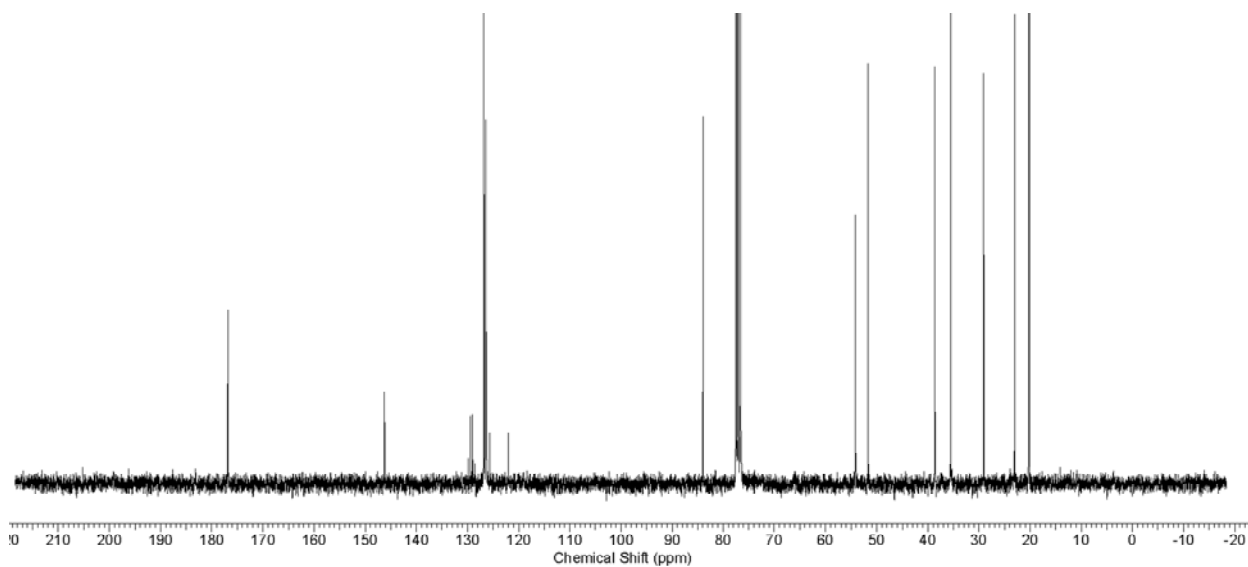

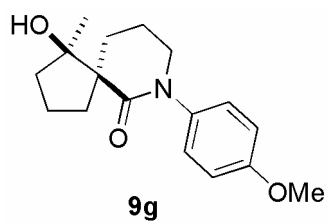

500 MHz, CDCl<sub>3</sub>

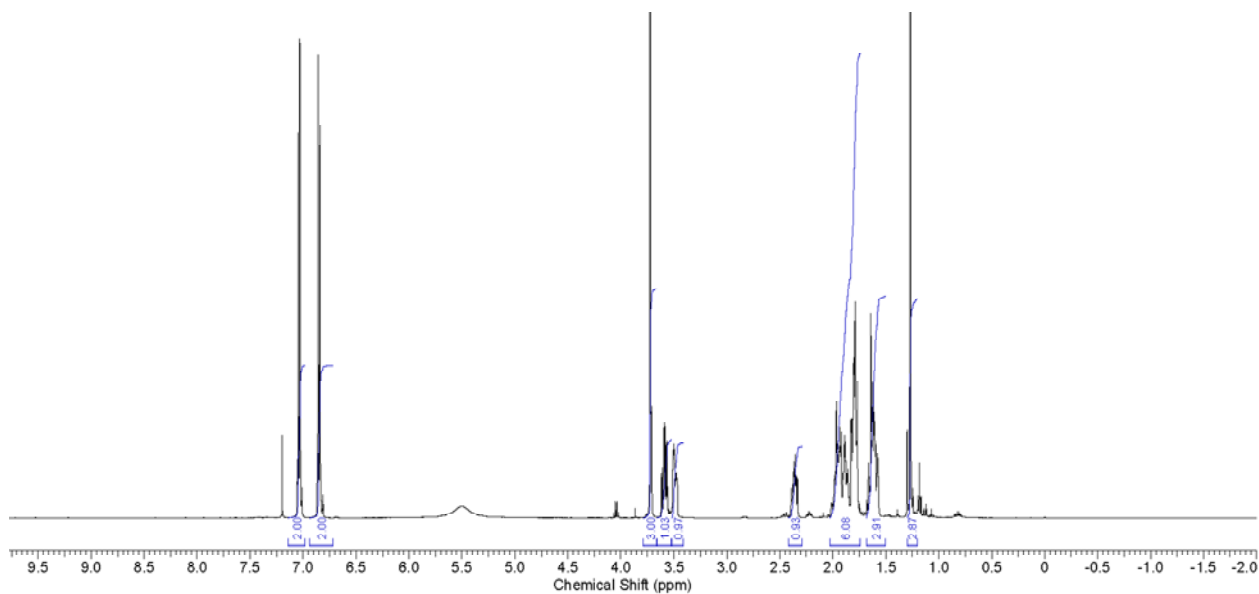

125 MHz, CDCl<sub>3</sub>

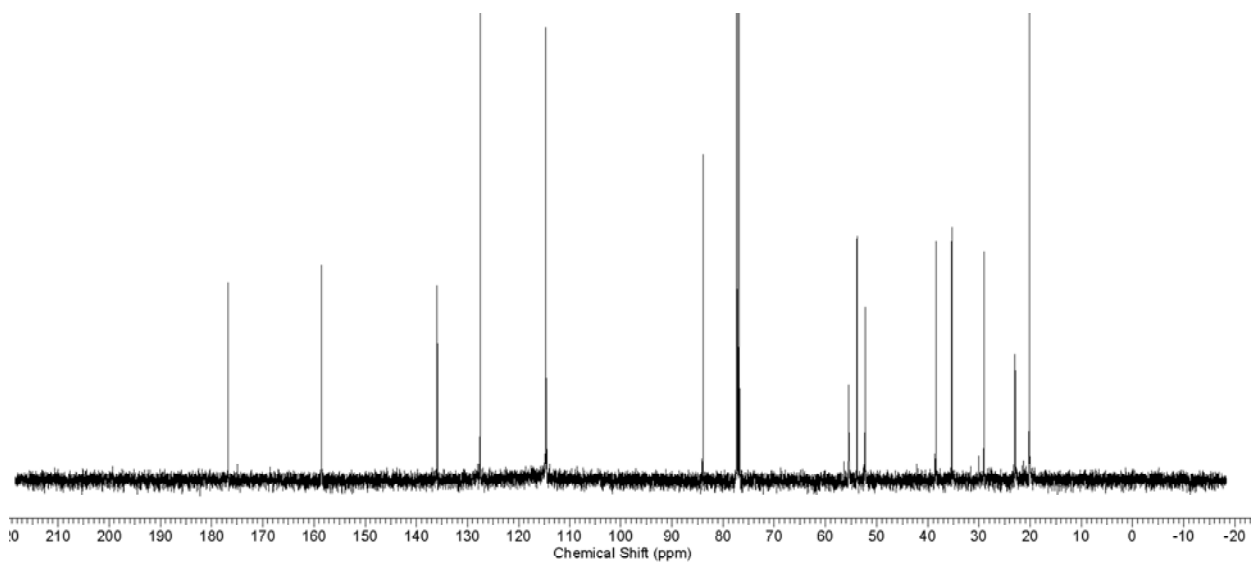

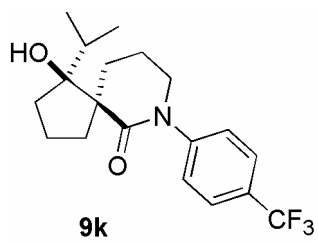

500 MHz, CDCl<sub>3</sub>

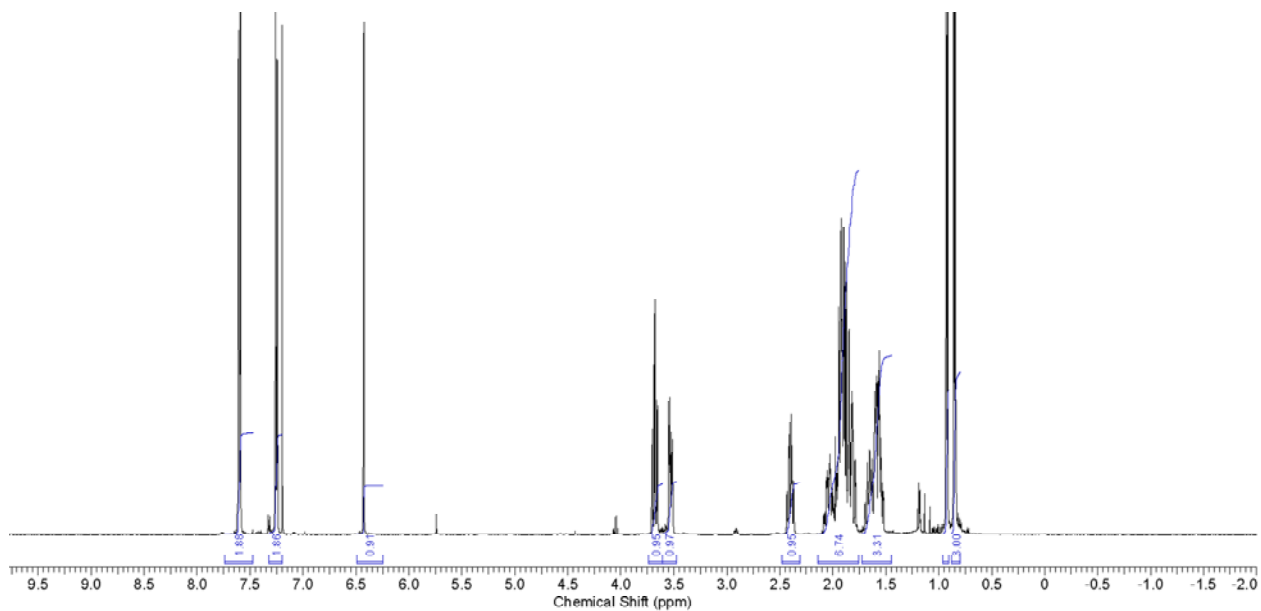

125 MHz, CDCl<sub>3</sub>

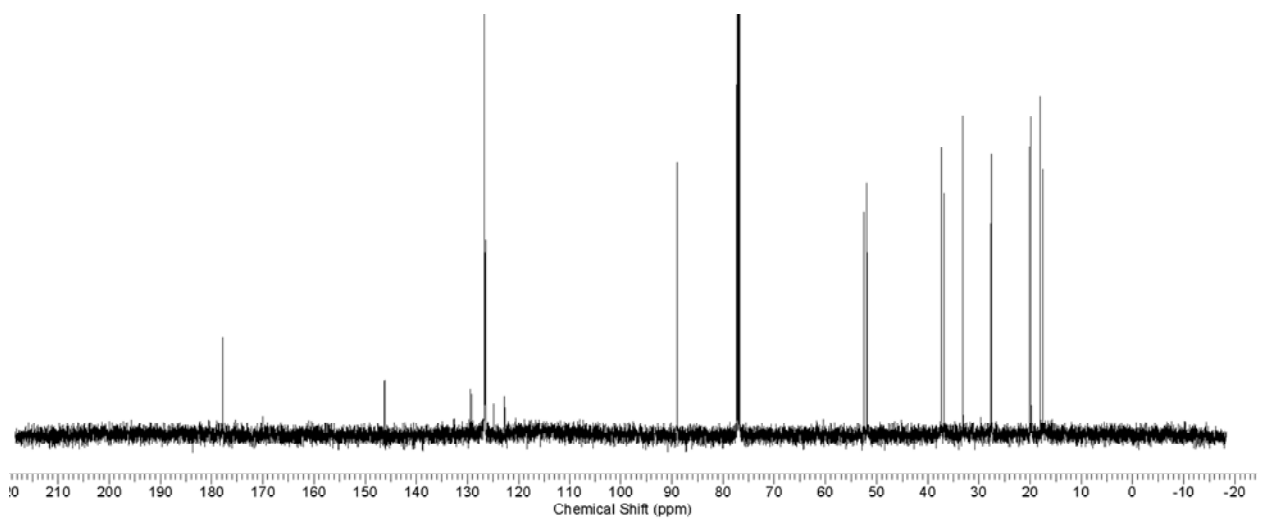

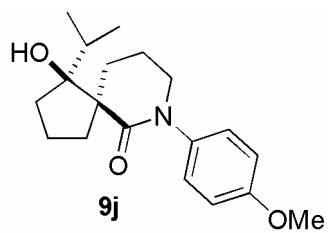

]

**400 MHz, CDCl<sub>3</sub>**

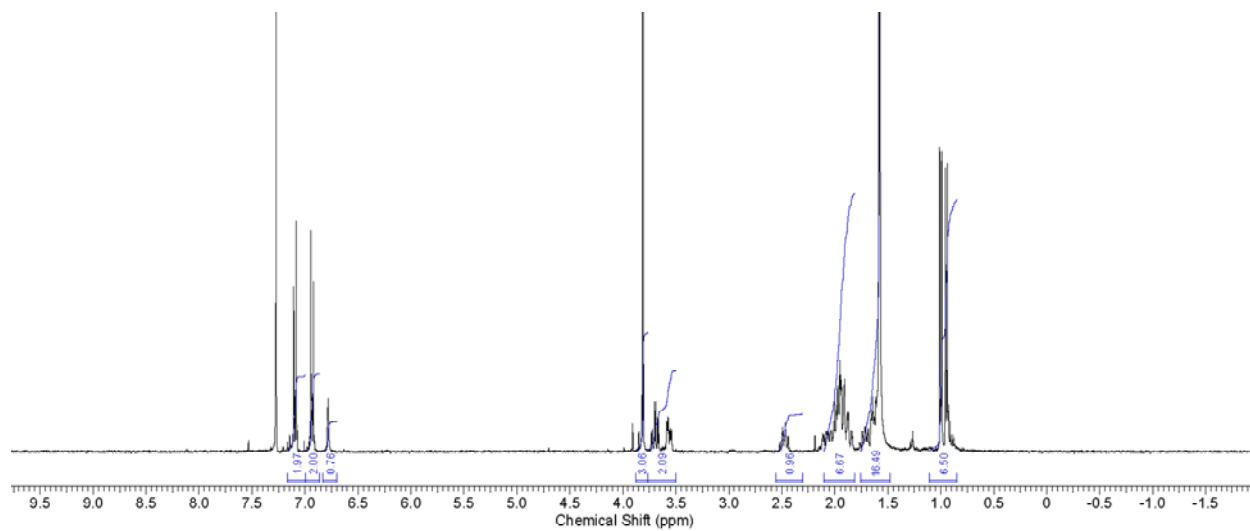

**100 MHz, CDCl<sub>3</sub>**

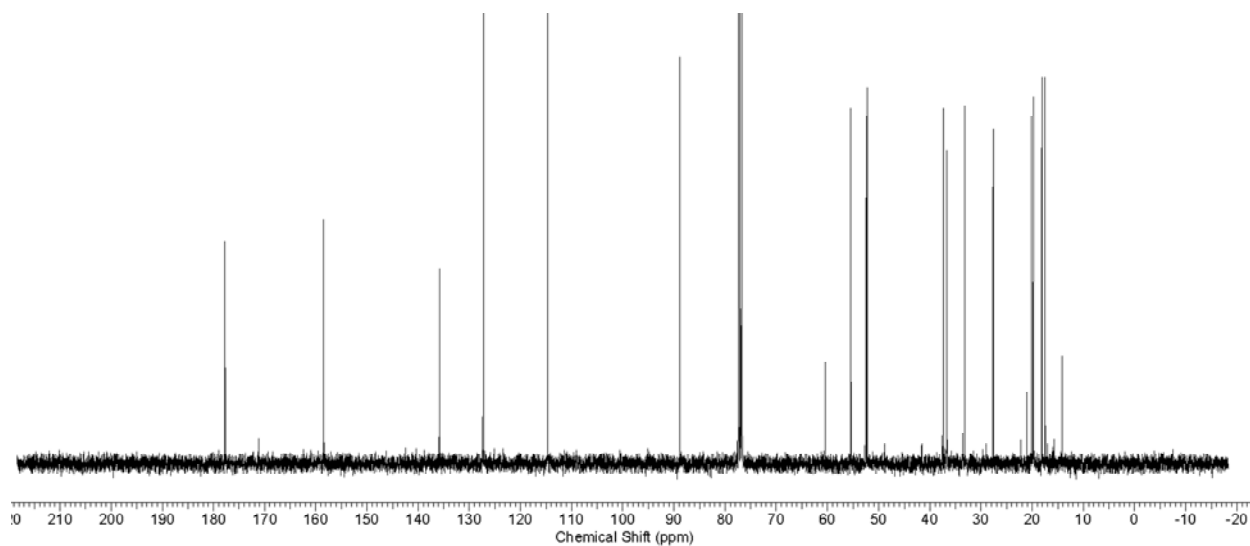

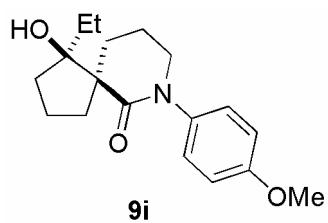

500 MHz, CDCl<sub>3</sub>

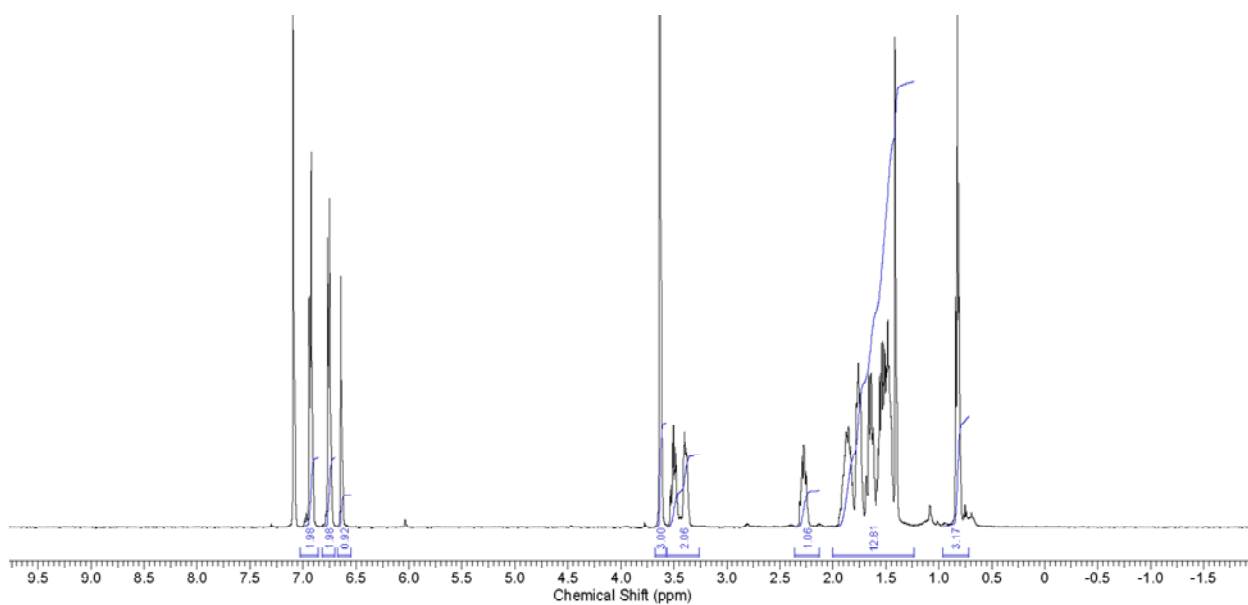

100 MHz, CDCl<sub>3</sub>

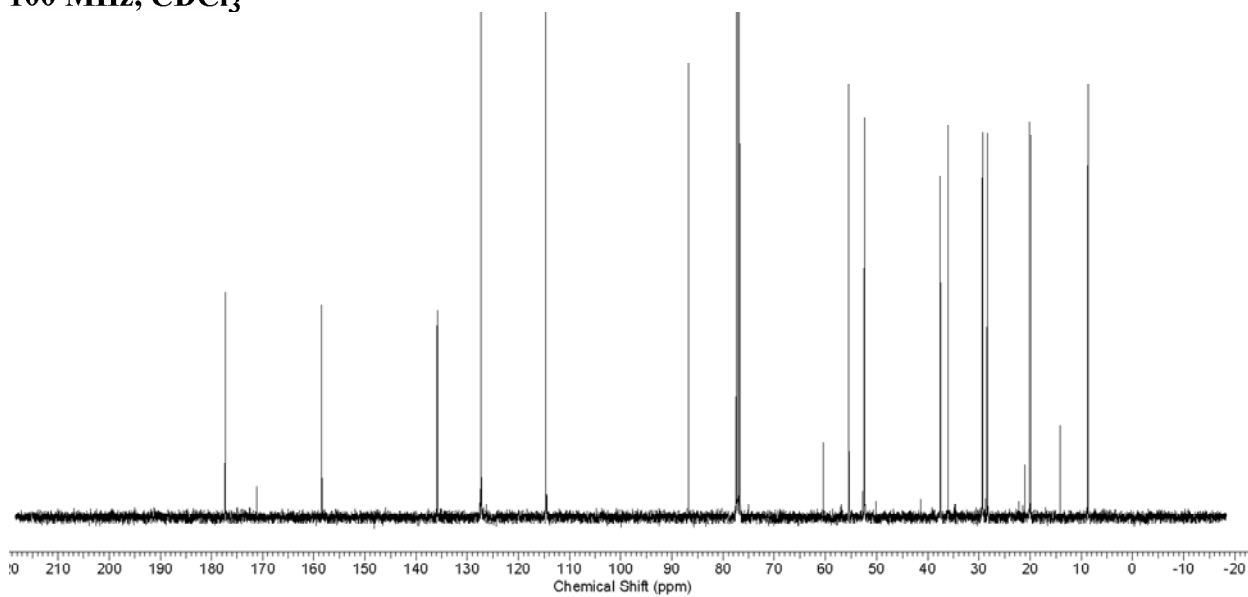

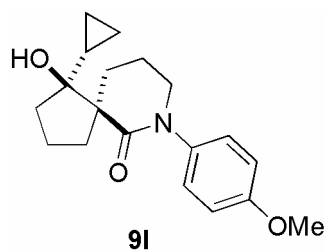

**400 MHz, CDCl<sub>3</sub>**

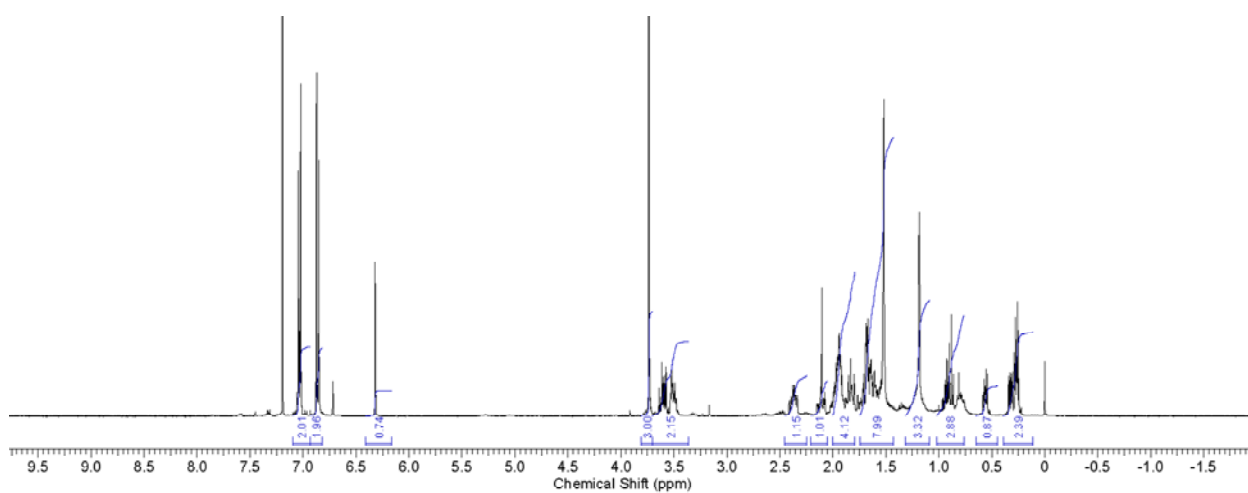

**100 MHz, CDCl<sub>3</sub>**

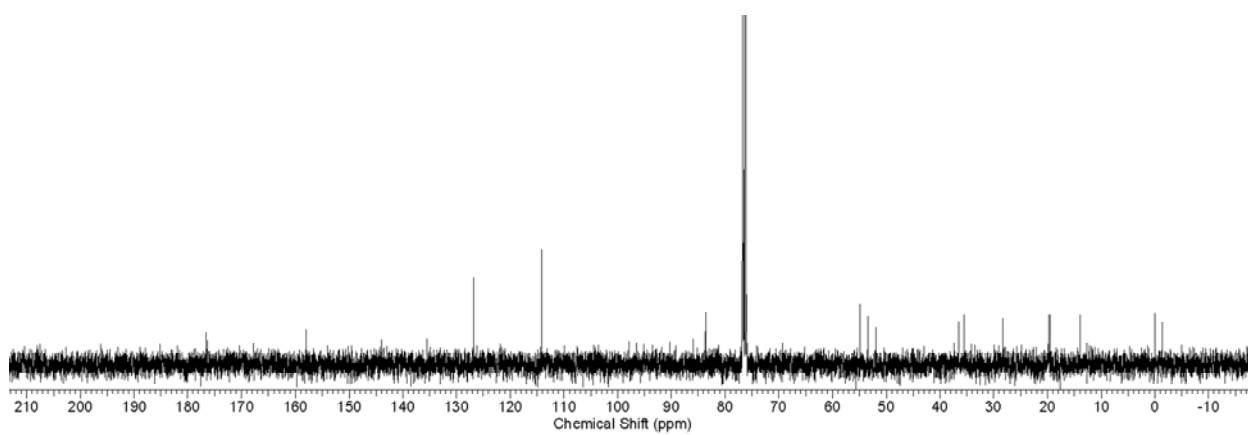

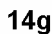



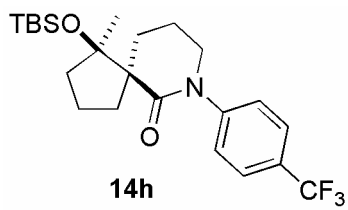

**400 MHz, CDCl<sub>3</sub>**

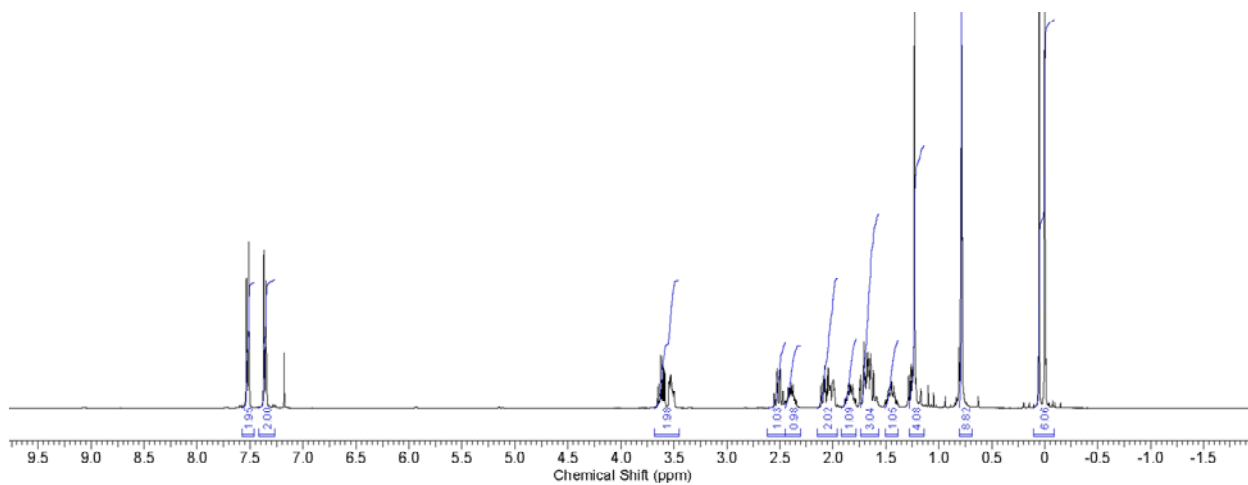

**100 MHz, CDCl<sub>3</sub>**

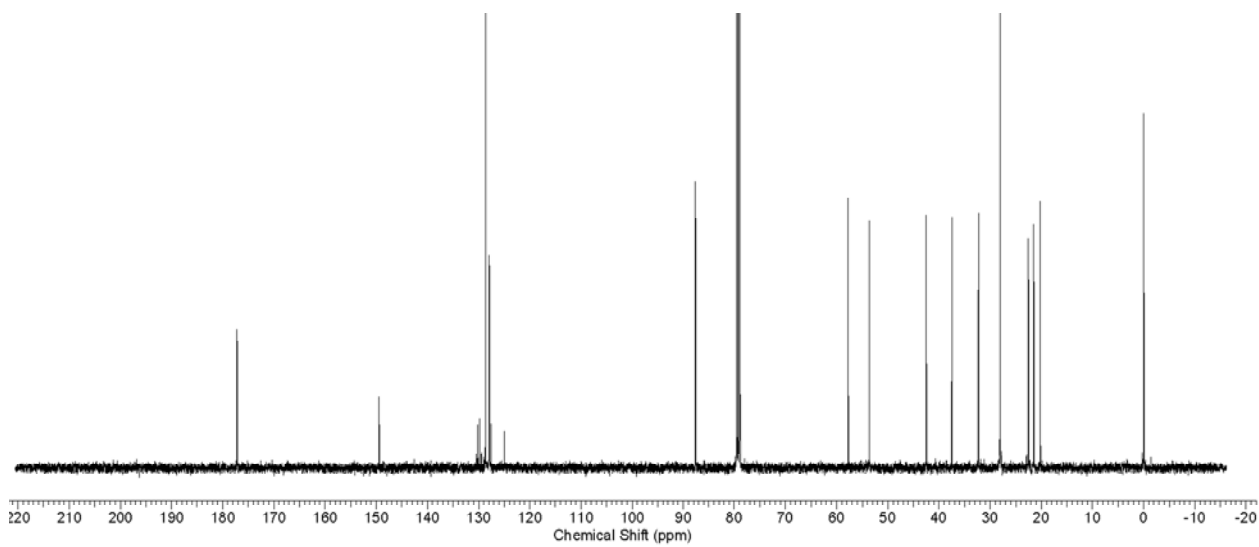

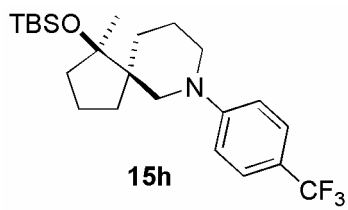

500 MHz, CDCl<sub>3</sub>

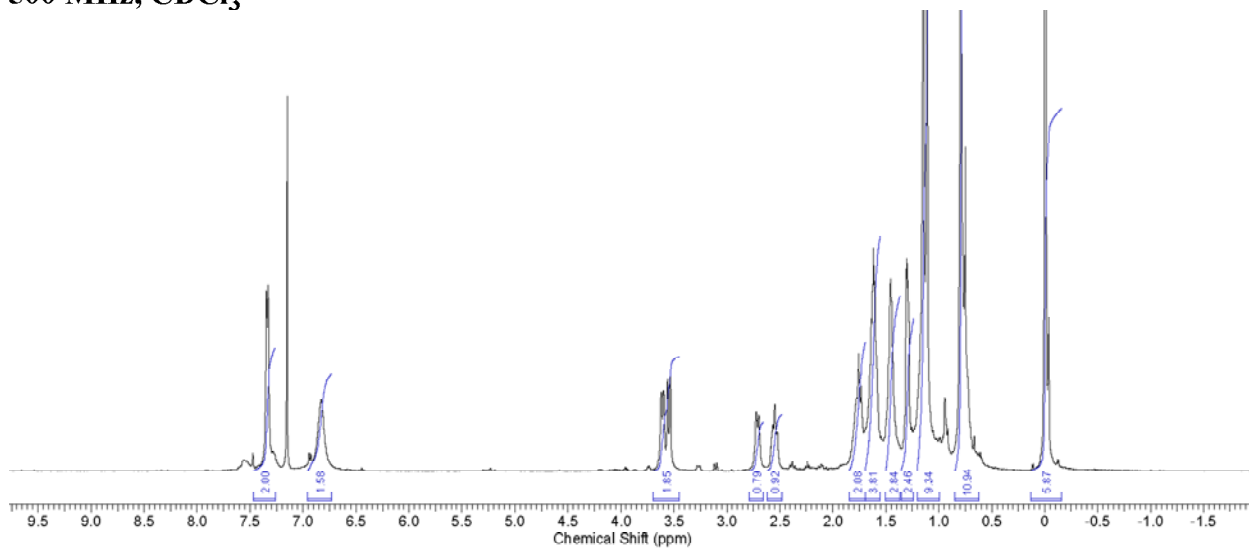

125 MHz, CDCl<sub>3</sub>

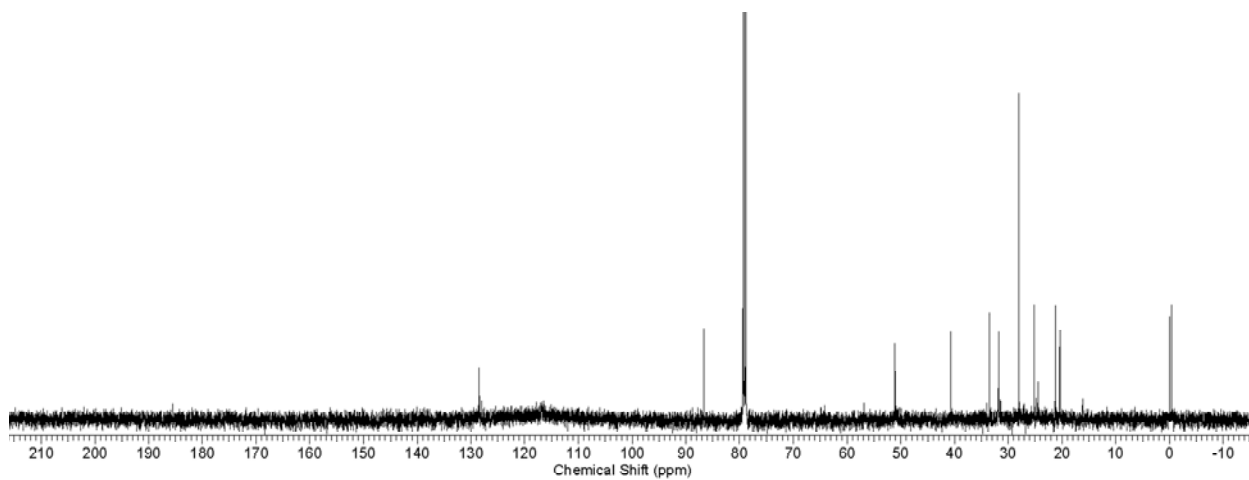

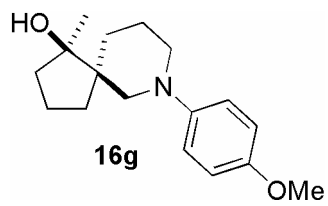

500 MHz, CDCl<sub>3</sub>

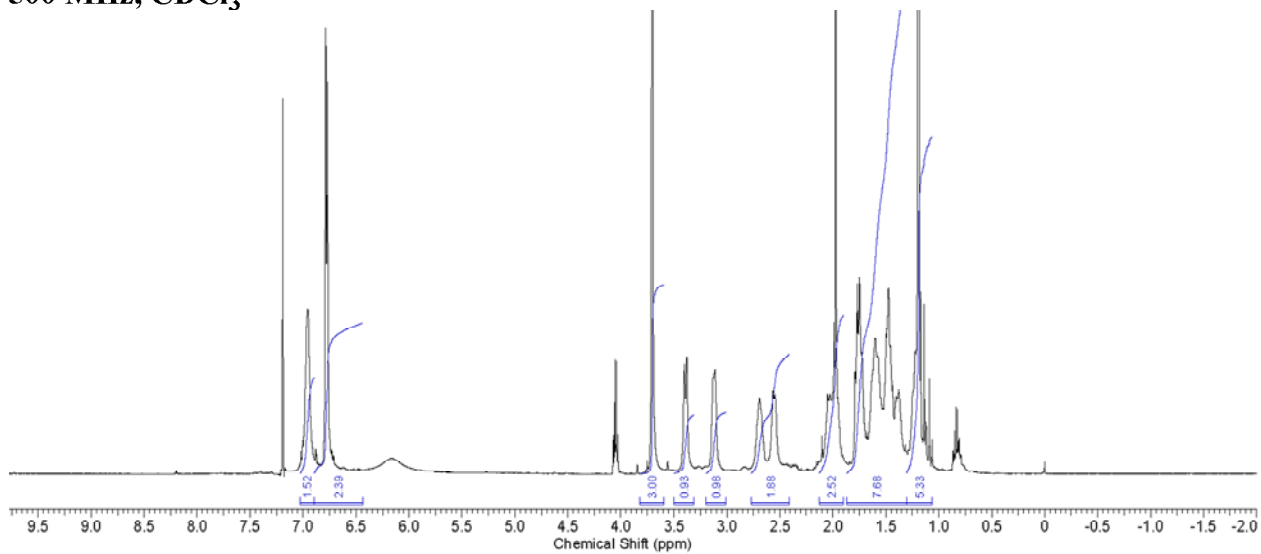

125 MHz, CDCl<sub>3</sub>

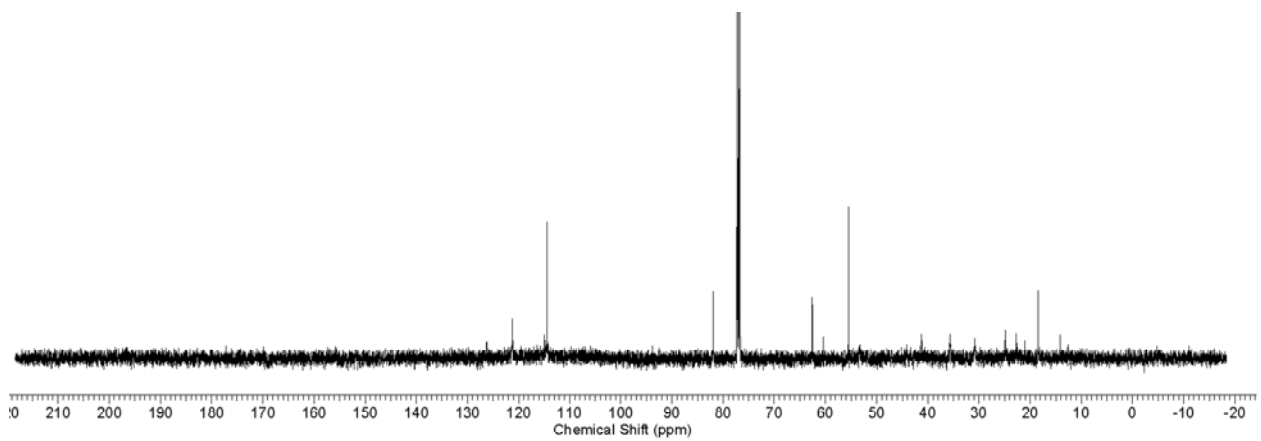

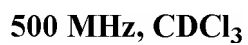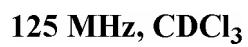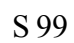

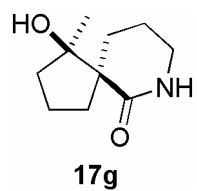

**400 MHz, CDCl<sub>3</sub>**

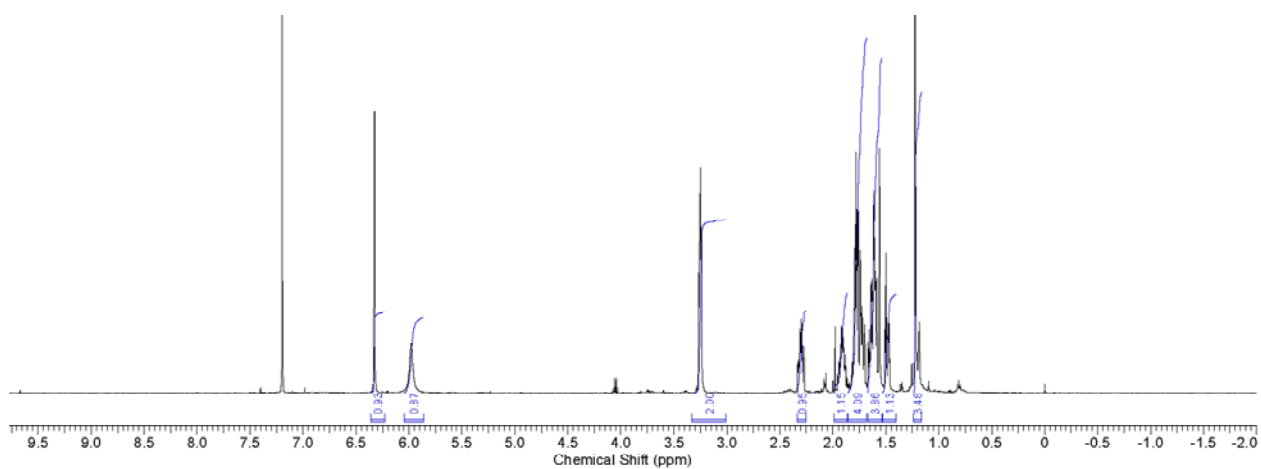

**100 MHz, CDCl<sub>3</sub>**

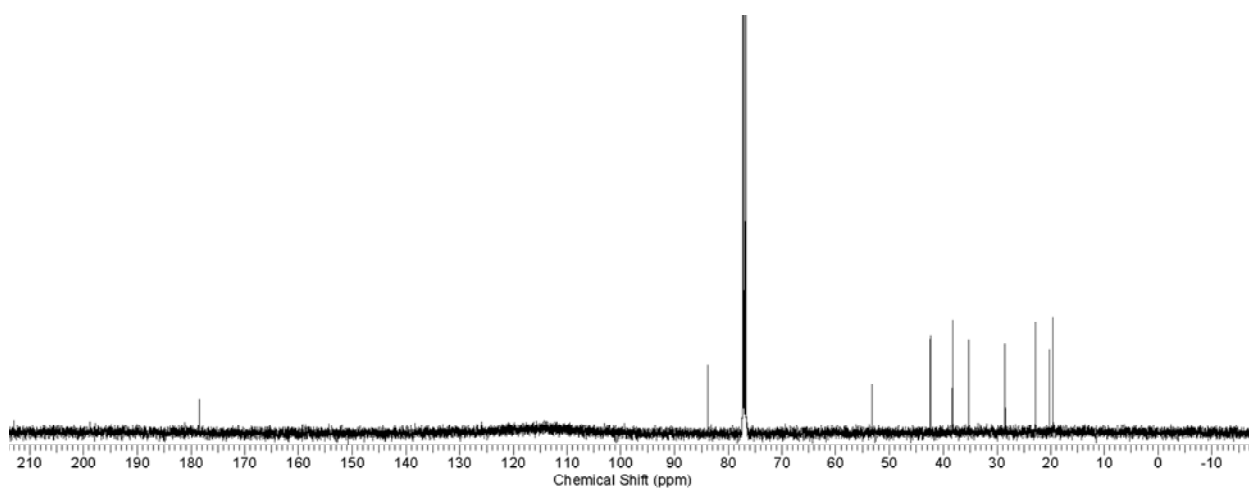

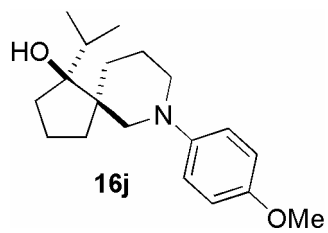

400 MHz, CDCl<sub>3</sub>

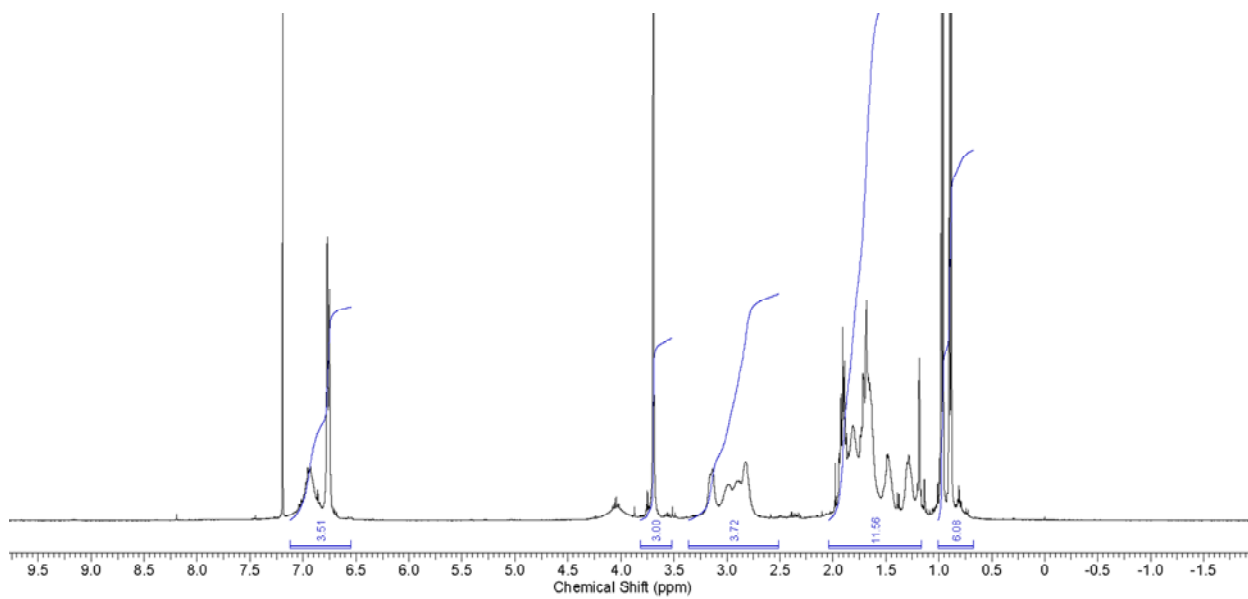

100 MHz, CDCl<sub>3</sub>

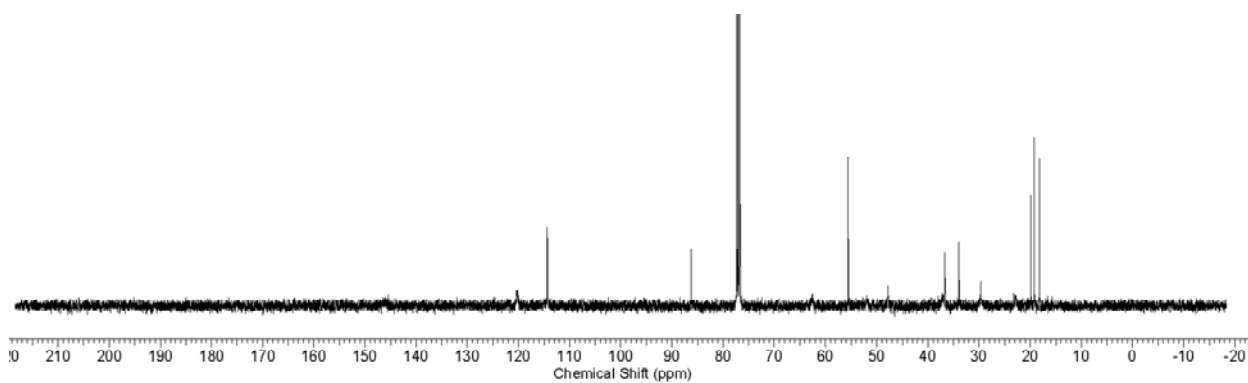

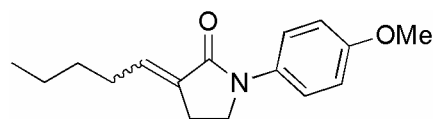

**11**

**E isomer**

**400 MHz, CDCl<sub>3</sub>**

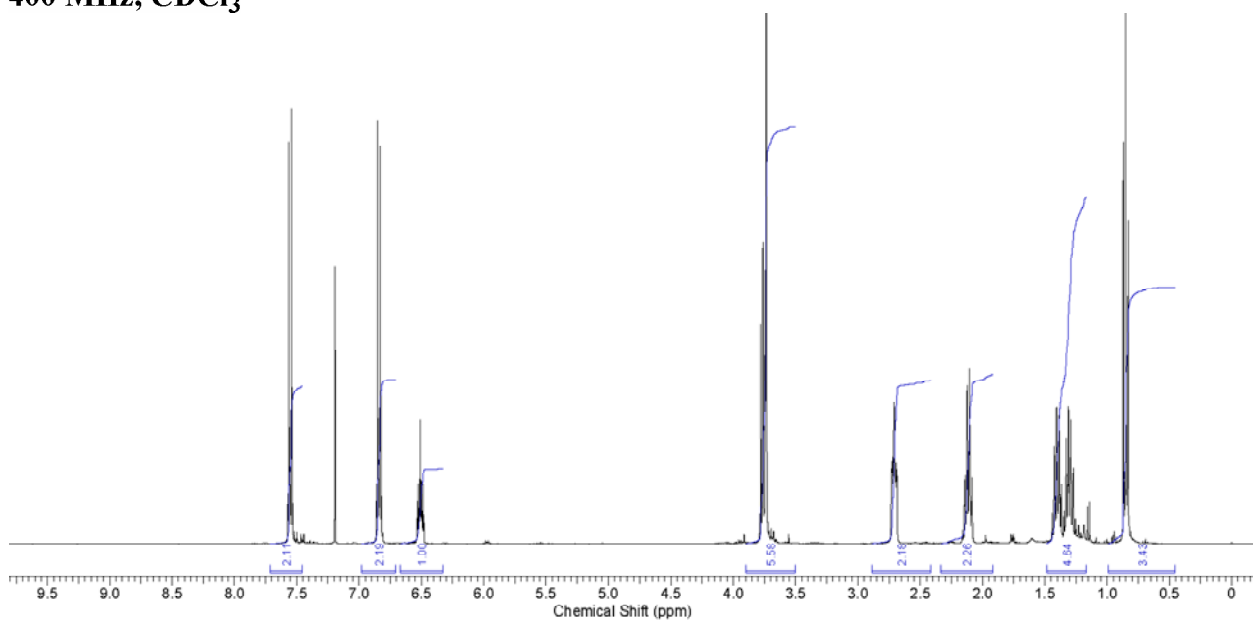

**75 MHz, CDCl<sub>3</sub>**

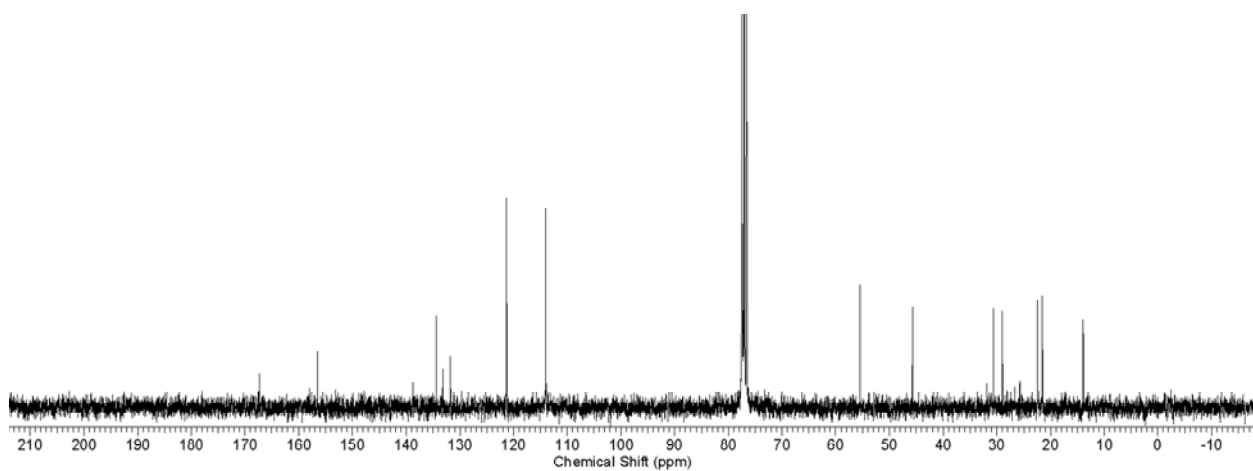



**11**

**Z isomer**

**400 MHz, CDCl<sub>3</sub>**

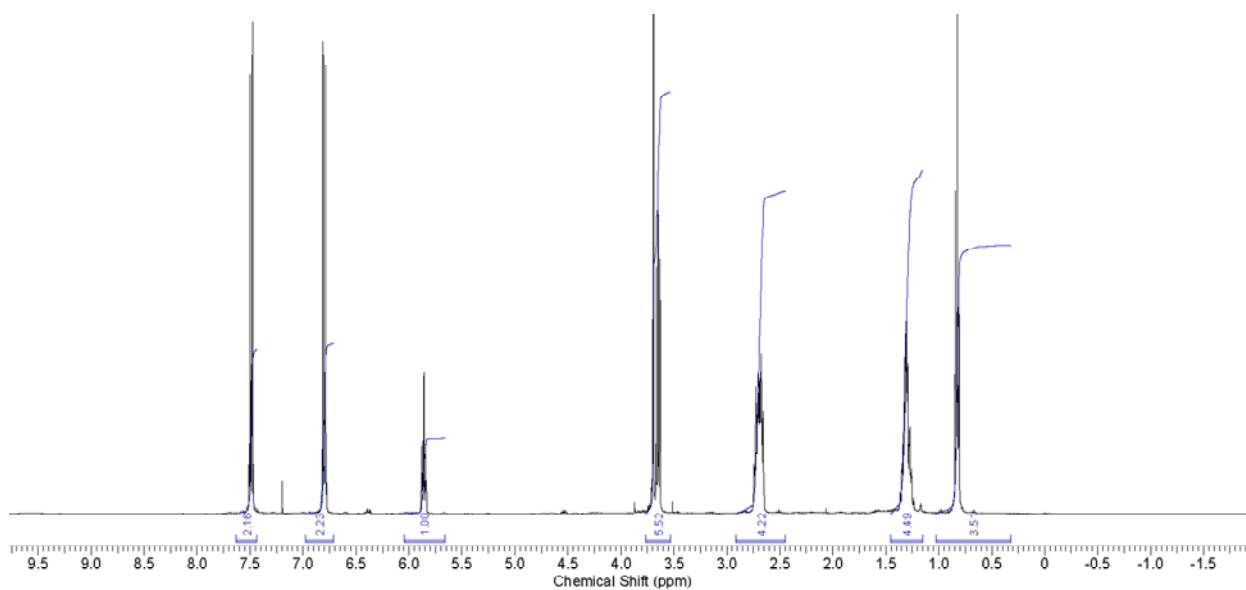

**75 MHz, CDCl<sub>3</sub>**

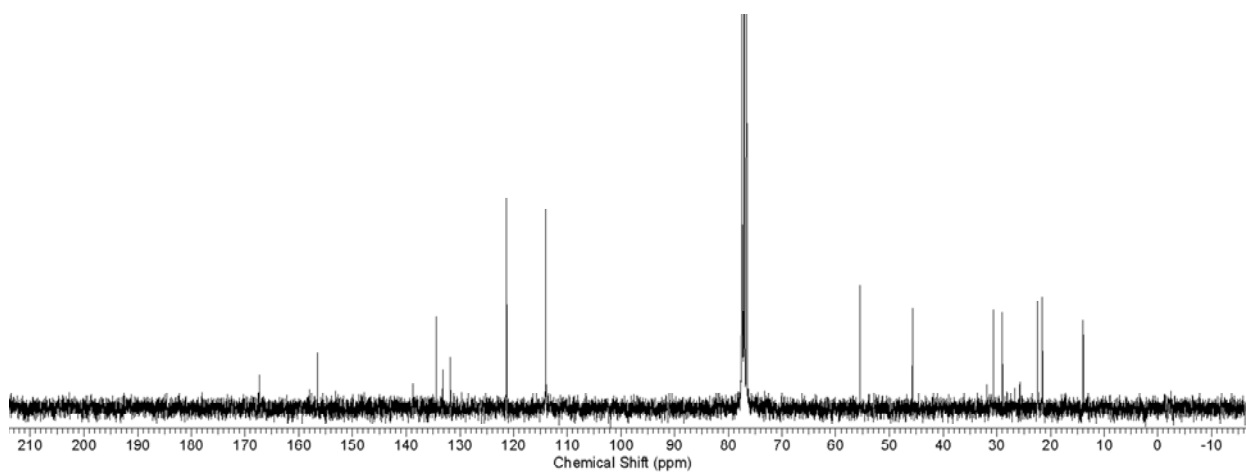



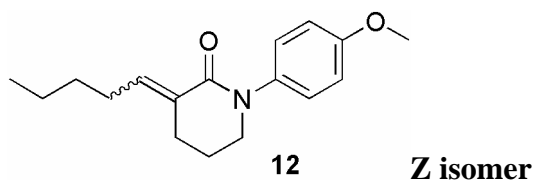

**400 MHz, CDCl<sub>3</sub>**

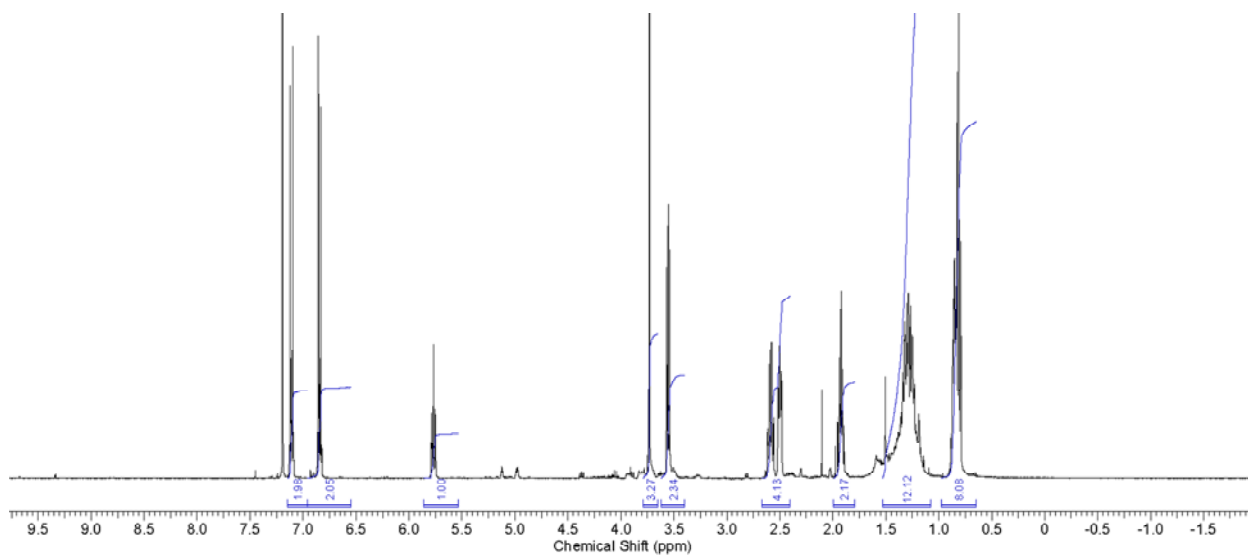

**75 MHz, CDCl<sub>3</sub>**

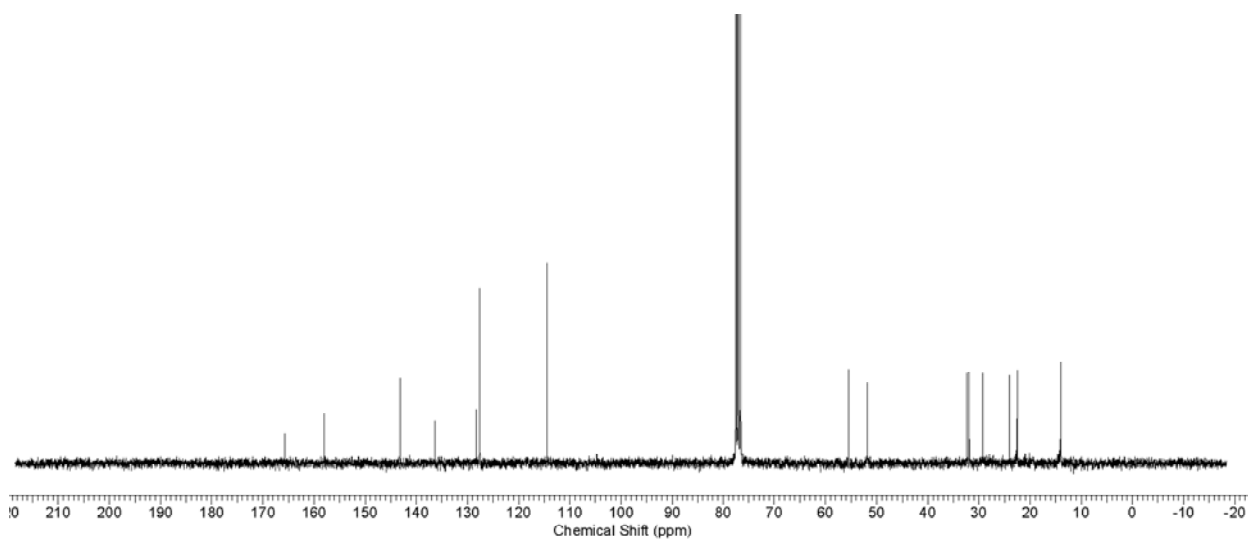

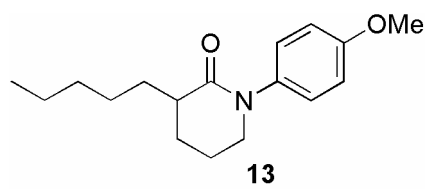

**400 MHz, CDCl<sub>3</sub>**

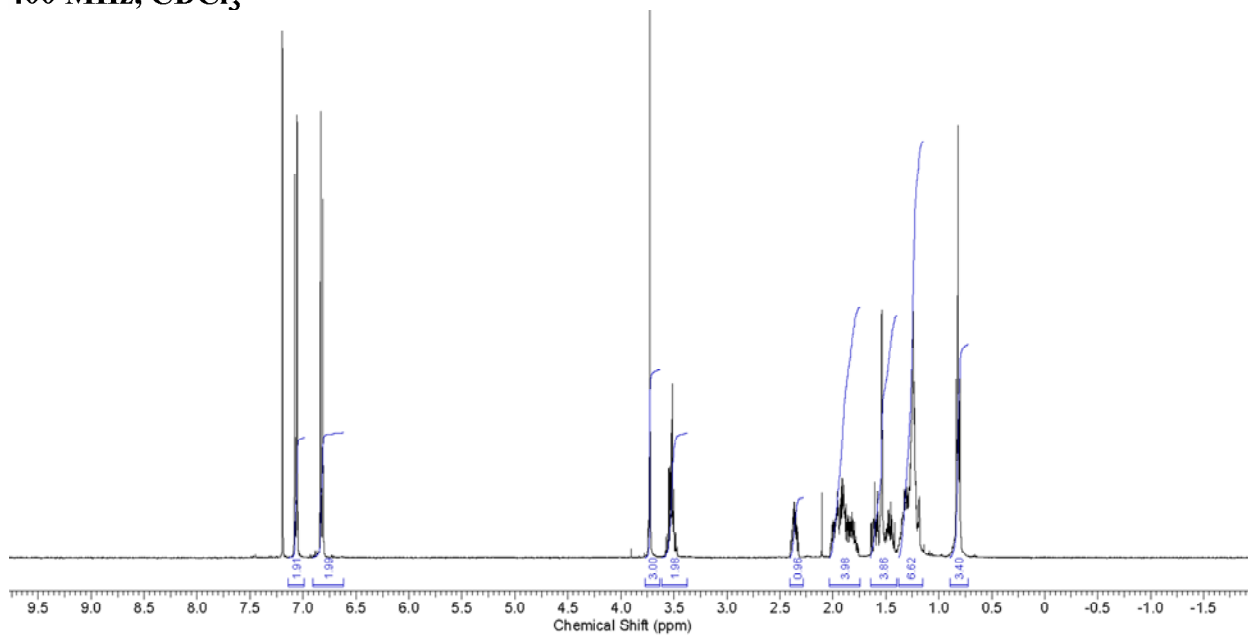

**100 MHz, CDCl<sub>3</sub>**

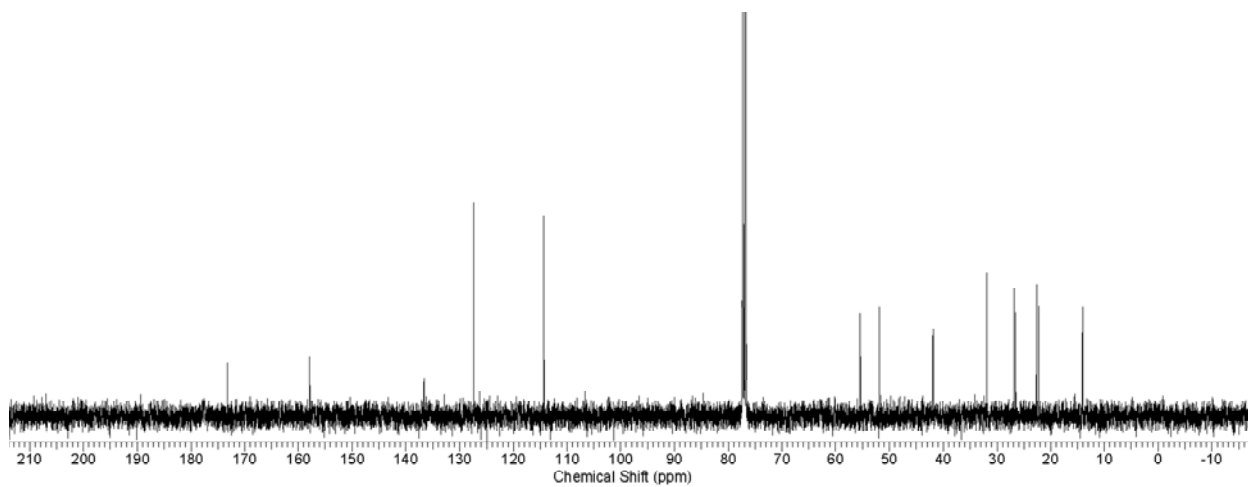

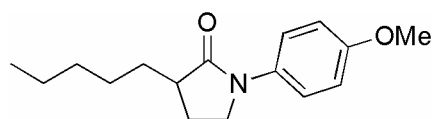

400 MHz, CDCl<sub>3</sub>

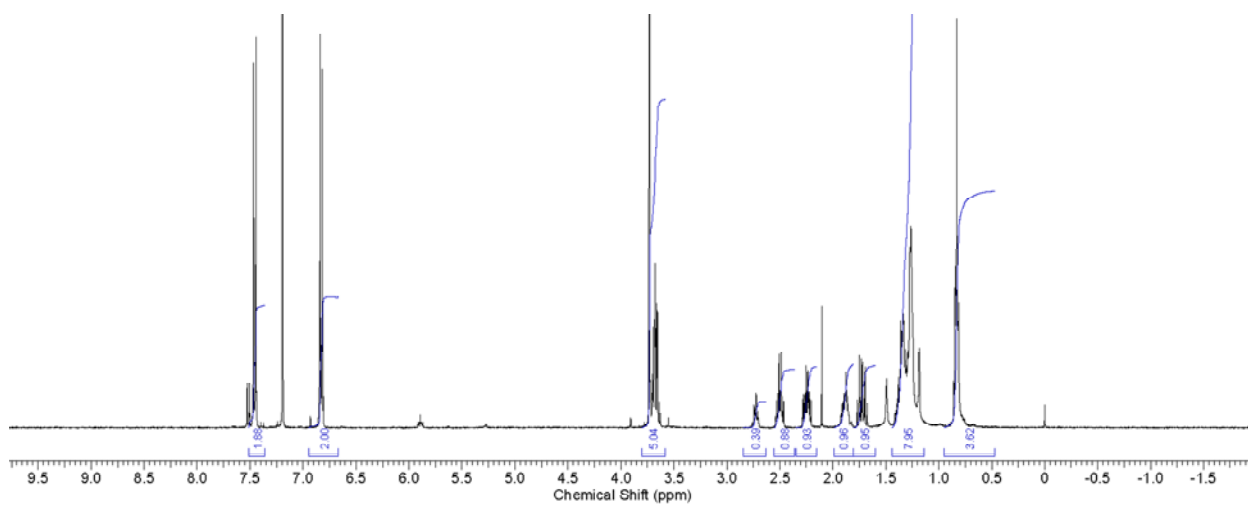

100 MHz, CDCl<sub>3</sub>

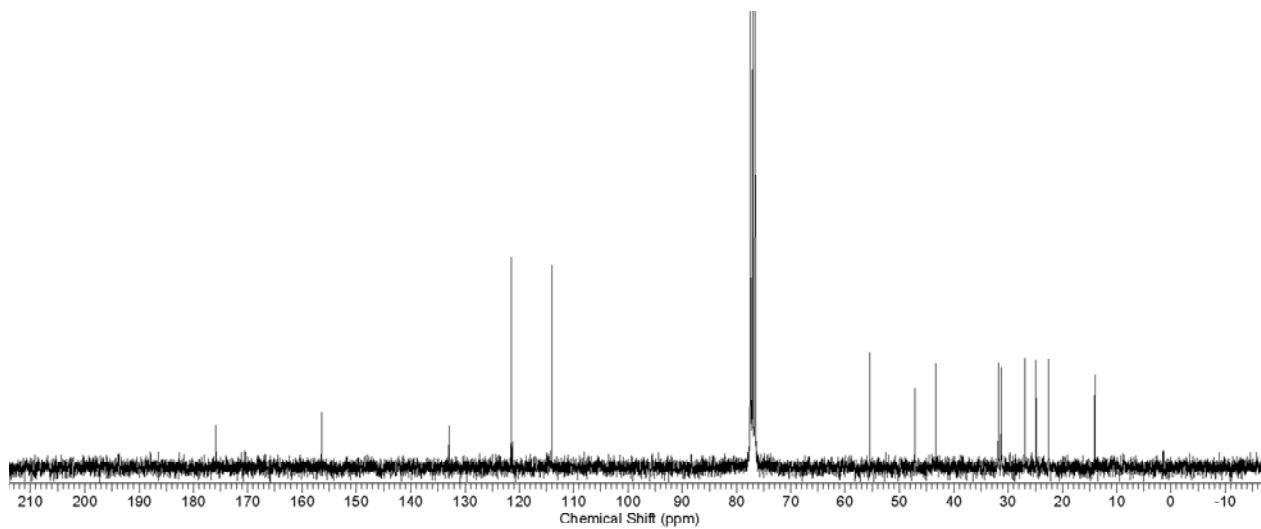

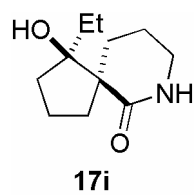

**400 MHz, CDCl<sub>3</sub>**

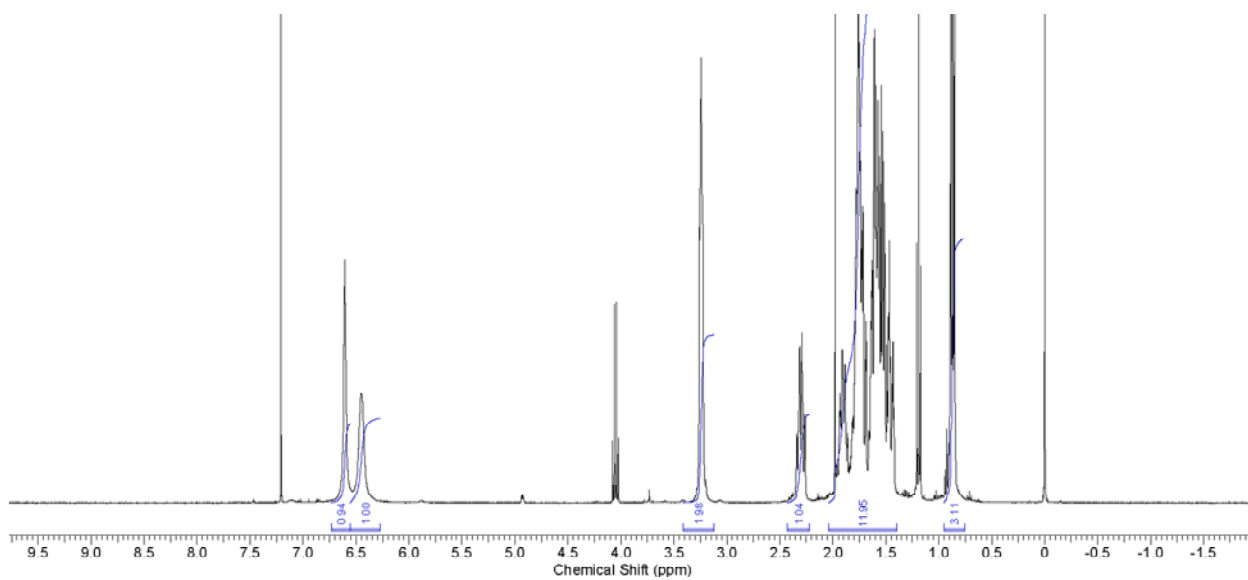

**100 MHz, CDCl<sub>3</sub>**

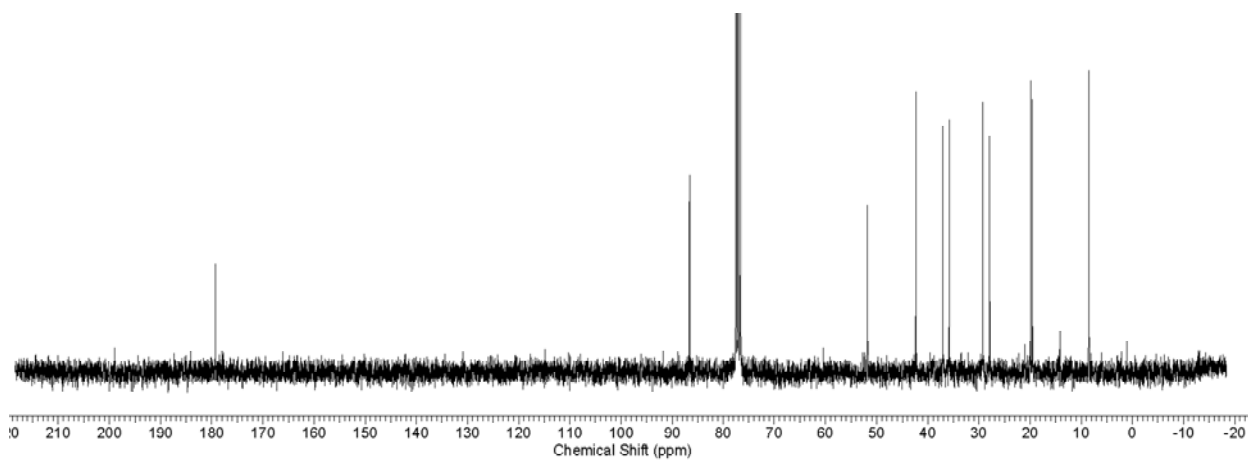

**X ray crystal of structure 9k**

**CCDC 694542**

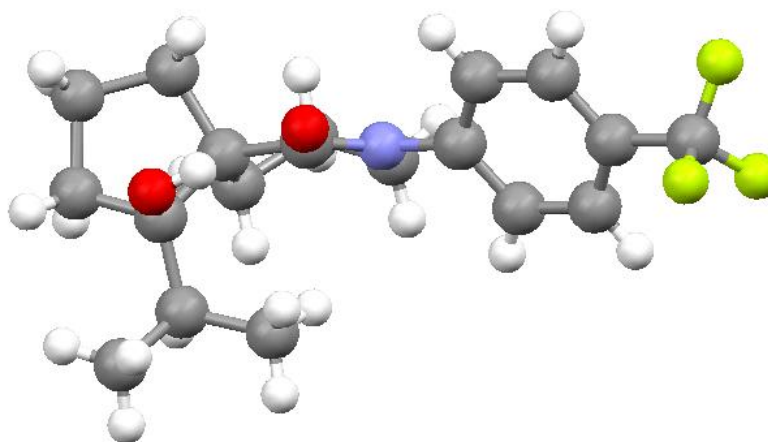

**X ray crystal of structure 7d**

**CCDC 694541**

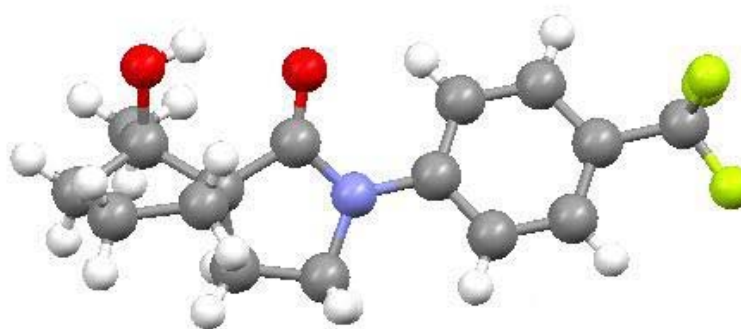

Supplement: Supplementary file 1 [file 4608733]
